# Supplementary material for: Association between religiosity and depression varies with age and sex among adults in South America: Evidence from the CESCAS I study
Source: PLoS One. 2019 Dec 16;14(12):e0226622. doi: 10.1371/journal.pone.0226622 (PMC6913958; doi:10.1371/journal.pone.0226622)
Supplement: S1 Table — Database and Codebook. (XLSX) [file pone.0226622.s001.xlsx]

## Sheet: database
id	weight	Male	AgeGroup	education	marital	cv1	alcohol	cv16a	cv16b	cv16c	cv16d	cv16e	cv16f	cv16g	cv16h	cv16i	City	sp1	sp3	score_phq9	mde
4900	11	0	1	1	1	4	0	1	1	1	1	1	1	1	1	1	1 MP	1	4	0	0
4901	12	1	2	1	1	3	1	1	1	1	1	1	1	1	1	1	1 MP	1	2	11	1
4902	11	0	1	2	1	3	0	1	1	1	1	1	1	2	1	1	1 MP	1	3	1	0
4904	6	0	3	1	1	2	0	1	1	1	1	1	1	1	1	1	1 MP	1	3	3	0
4908	22	1	1	2	1	3	0	2	1	1	1	1	1	1	1	1	1 MP	1	5	6	0
4910	6	0	3	1	0	3	0	1	1	1	1	1	1	1	2	1	1 MP	1	3	4	0
4912	6	0	3	1	0	3	0	1	1	1	1	1	2	1	2	1	1 MP	1	3	4	0
4914	8	0	2	1	1	3	1	1	1	1	1	1	1	1	1	1	1 MP	1	5	2	0
4915	8	1	3	1	1	4	0	1	1	1	1	1	1	1	1	1	1 MP	2		0	0
4916	8	0	2	2	1	2	0	2	1	1	1	1	2	1	1	1	1 MP	1	5	0	0
4918	6	1	4	1	1	3	0	1	1	1	1	1	1	1	1	1	1 MP	1	3	15	1
4920	11	0	1	1	1	2	0	1	1	1	1	1	1	1	2	1	1 MP	1	2	0	0
4922	11	0	1	2	0	3	0	2	1	1	1	1	2	1	1	1	1 MP	1	3	2	0
4923	5	0	4	1	1	3	0	1	1	1	1	1	1	1	1	1	1 MP	1	3	5	0
4924	22	1	1	2	1	3	1	1	1	1	1	1	1	2	1	1	1 MP	1	2	4	0
4925	8	0	2	1	1	3	1	1	1	1	1	1	1	1	1	1	1 MP	1	5	2	0
4926	5	0	4	1	0	2	0	1	1	1	1	1	1	1	1	1	1 MP	1	2	13	1
4927	12	1	2	1	0	2	0	1	1	1	1	1	1	1	1	1	1 MP	1	3	1	0
4932	11	0	1	2	1	3	0	1	1	1	1	1	1	1	1	1	1 MP	1	3	6	0
4934	6	1	4	1	0	3	1	1	1	1	1	1	1	1	1	1	1 MP	1	5	11	1
4938	8	1	3	1	0	3	1	1	1	1	1	1	1	1	1	1	1 MP	1	3	0	0
4939	22	1	1	1	1	3	1	1	1	2	1	1	1	1	2	1	1 MP	1	5	0	0
4941	12	1	2	1	0	4	0	1	1	1	1	1	2	1	1	1	1 MP	2		2	0
4944	6	0	3	1	1	3	0	1	1	1	1	1	1	1	1	1	1 MP	1	1	7	0
4946	22	1	1	3	1	3	0	1	1	1	1	1	1	2	2	1	1 MP	2		0	0
4949	6	0	3	3	1	3	0	1	1	1	1	1	2	2	2	1	1 MP	1	3	1	0
4950	6	1	4	2	0	3	0	1	1	1	1	1	1	2	1	1	1 MP	1	5	4	0
4951	6	0	3	1	1	3	1	1	1	1	1	1	1	1	1	1	1 MP	1	2	2	0
4953	11	0	1	1	0	4	0	1	1	1	1	1	1	2	2	2	1 MP	1	3	2	0
4954	12	1	2	1	1	2	1	1	1	1	1	1	1	1	1	1	1 MP	1	3	0	0
4955	8	0	2	1	0	2	0	1	1	1	1	1	1	1	1	1	1 MP	1	3	0	0
4956	6	0	3	2	1	3	1	1	1	1	1	1	1	2	1	1	1 MP	1	3	3	0
4958	22	1	1	1	1	3	0	1	1	1	1	1	2	1	2	1	1 MP	1	5	0	0
4959	8	0	2	1	1	2	1	1	1	2	1	1	1	2	1	1	1 MP	1	5	0	0
4960	12	1	2	2	0	2	0	1	1	1	1	1	1	1	1	1	1 MP	1	5	0	0
4968	11	0	1	2	0	4	1	1	1	1	1	1	2	1	1	1	1 MP	1	5	0	0
4969	8	0	2	1	1	3	1	1	1	1	1	1	1	1	1	1	1 MP	1	5	0	0
4972	8	1	3	1	1	4	0	1	1	1	1	1	1	1	1	1	1 MP	1	4	0	0
4983	8	0	2	1	1	3	1	1	1	1	1	1	2	1	2	1	1 MP	1	3	1	0
4991	6	0	3	2	1	2		1	1	1	1	1	2	1	1	1	1 MP	2		8	1
4992	8	1	3	2	1	4	1	1	1	1	1	1	1	1	1	1	1 MP	1	4	2	0
4994	5	0	4	1	1	3	1	2	1	1	1	1	2	1	1	1	1 MP	1	3	2	0
4996	6	1	4	1	1	2	1	1	1	1	1	1	1	1	1	1	1 MP	1	5	3	0
4997	8	0	2	1	0	3	1	1	1	1	1	1	1	1	1	1	1 MP	1	5	15	1
4999	6	0	3	2	1	3	1	1	1	1	1	1	1	1	1	1	1 MP	1	3	0	0
5000	5	0	4	2	0	4	1	1	1	1	1	1	1	1	1	1	1 MP	1	5	0	0
5001	6	1	4	1	1	4	0	1	1	1	1	2	2	2	2	1	1 MP	1	3	1	0
5003	5	0	4	1	1	2	1	1	2	1	1	1	1	1	1	1	1 MP	1	4	4	0
5004	5	0	4	3	0	4	0	1	1	2	1	1	1	1	1	1	1 MP	1	2	0	0
5007	8	0	2	2	0	4	0	1	1	1	1	1	2	1	2	1	1 MP	1	2	0	0
5008	8	0	2	1	0	3	0	1	2	1	1	1	1	2	1	1	1 MP	1	2	7	0
5011	8	1	3	1	1	3	1	1	1	1	1	1	1	1	1	1	1 MP	1	4	0	0
5012	6	0	3	1	1	4	1	1	1	1	1	1	1	1	1	1	1 MP	1	4	0	0
5013	11	0	1	1	1	4	1	1	1	1	1	1	2	2	1	1	1 MP	1	5	0	0
5014	11	0	1	1	1	1	1	1	1	1	1	1	1	1	2	1	1 MP	1	5	0	0
5015	12	1	2	1	0	4	0	1	1	1	1	1	2	1	1	1	1 MP	1	5	0	0
5016	8	0	2	2	1	3	1	1	1	1	1	1	1	1	1	1	1 MP	1	2	0	0
5018	6	0	3	1	1	3	0	1	1	1	1	1	1	1	2	1	1 MP	1	4	10	1
5019	6	1	4	2	1	3	0	1	1	1	1	1	1	1	1	1	1 MP	1	4	0	0
5020	22	1	1	1	1	2	1	1	1	1	1	1	1	1	1	1	1 MP	1	3	0	0
5023	11	0	1	1	1	3	0	1	1	1	1	1	1	1	2	1	1 MP	1	5	0	0
5024	8	0	2	1	1	4	0	1	1	1	1	1	1	1	1	1	1 MP	1	4	0	0
5026	8	0	2	1	0	3	0	1	1	1	1	1	1	1	1	1	1 MP	1	3	0	0
5028	6	0	3	1	1	4	0	1	1	1	1	1	1	1	2	1	1 MP	1	5	4	0
5029	8	1	3	1	1	3	0	1	1	1	1	1	1	1	1	1	1 MP	2		0	0
5030	11	0	1	1	0	4	1	1	1	1	2	1	1	1	1	1	1 MP	1	4	0	0
5031	6	0	3	3	0	3	0	1	1	1	1	1	1	1	1	1	1 MP	1	4	0	0
5033	11	0	1	1	1	3	0	2	1	1	1	1	2	2	1	1	1 MP	1	3	8	1
5037	11	0	1	2	1	5	0	1	1	1	1	1	1	1	1	1	1 MP	2		0	0
5039	6	1	4	2	1	4	0	1	1	1	1	1	2	2	1	1	1 MP	1	5	0	0
5041	6	1	4	3	1	1	1	1	1	1	1	1	1	1	1	1	1 MP	2		0	0
5042	6	1	4	3	0	4	0	1	1	1	1	1	2	1	2	1	1 MP	1	3	1	0
5045	6	0	3	1	1	3	1	1	1	1	1	1	2	1	1	1	1 MP	1	4	0	0
5046	6	0	3	1	1	3	1	1	1	1	1	1	1	1	2	1	1 MP	1	2	0	0
5048	22	1	1	1	1	3	0	1	1	1	1	1	2	1	2	1	1 MP	1	4	0	0
5050	22	1	1	1	1	1	1	1	1	1	1	2	2	1	2	1	1 MP	1	3	0	0
5053	8	0	2	1	1	3	0	1	1	1	1	1	1	1	2	1	1 MP	1	3	2	0
5054	6	0	3	1	0	3	1	1	1	1	1	1	1	1	1	1	1 MP	1	2	3	0
5055	8	1	3	1	1	3	0	1	1	1	1	1	1	1	1	1	1 MP	1	4	4	0
5060	11	0	1	2	0	3	1	1	1	1	1	1	1	1	1	1	1 MP	1	5	0	0
5061	11	0	1	1	1	4	0	1	1	1	1	1	2	1	1	1	1 MP	1	4	0	0
5062	11	0	1	1	0	4	1	1	1	1	1	1	2	2	1	1	1 MP	1	3	0	0
5065	6	0	3	1	1	3	0	1	1	1	1	1	2	1	1	1	1 MP	1	3	2	0
5066	8	1	3	1	1	3	0	1	1	1	1	1	1	1	1	1	1 MP	1	2	8	1
5069	8	0	2	2	1	3	0	1	1	1	1	1	1	1	1	1	1 MP	1	3	0	0
5070	11	0	1	1	0	2	0	1	1	1	1	1	1	1	2	1	1 MP	1	3	0	0
5071	12	1	2	2	1	2	1	1	1	1	1	1	1	1	1	1	1 MP	1	5	0	0
5072	11	0	1	2	1	2	0	1	1	1	1	1	1	1	1	1	1 MP	1	3	0	0
5073	8	1	3	1	0	3	1	2	1	1	1	1	1	1	1	1	1 MP	2		2	0
5074	6	0	3	2	1	3	0	2	1	1	1	1	1	1	1	1	1 MP	1	3	9	1
5077	11	0	1	2	1	3	0	1	1	1	1	1	1	1	1	1	1 MP	1	3	0	0
5079	8	0	2	1	0	3	0	1	1	1	1	1	1	1	1	1	1 MP	1	5	0	0
5080	11	0	1	1	1	3	0	1	1	1	1	1	1	1	1	1	1 MP	1	3	0	0
5084	12	1	2	2	0	3	0	1	2	1	1	1	2	1	1	1	1 MP	1	3	1	0
5090	22	1	1	1	1	3	0	1	1	2	1	1	1	1	1	1	1 MP	1	4	0	0
5091	22	1	1	1	1	3	0	1	1	1	1	1	1	1	1	1	1 MP	1	3	0	0
5092	11	0	1	1	1	1	0	1	1	1	1	2	1	2	2	2	1 MP	1	3	0	0
5093	11	0	1	3	1	2	1	1	1	1	1	1	1	1	1	1	1 MP	1	2	0	0
5094	11	0	1	1	1	2	1	1	1	1	1	1	1	1	1	1	1 MP	1	3	0	0
5095	11	0	1	1	1	3	1	1	1	1	1	1	1	1	1	1	1 MP	1	3	0	0
5096	11	0	1	1	0	3	1	1	1	1	1	1	1	1	1	1	1 MP	1	3	1	0
5097	6	1	4	1	1	3	1	1	1	1	1	1	1	1	1	1	1 MP	2		1	0
5098	11	0	1	2	0	4	0	1	1	1	1	1	1	1	1	1	1 MP	1	2	0	0
5099	6	0	3	1	1	4	1	1	1	1	1	1	1	1		1	1 MP	1	2	1	0
5101	5	0	4	1	0	4	0	1	1	1	1	1	1	1	1	1	1 MP	1	3	0	0
5102	6	0	3	1	0	4	1	1	1	1	1	1	1	1	2	1	1 MP	1	3	4	0
5103	6	0	3	1	0	3	0	1	1	1	1	1	1	2	2	1	1 MP	1	3	0	0
5107	5	0	4	1	1	4	0	1	1	1	1	1	1	2	1	1	1 MP	1	3	0	0
5108	11	0	1	2	1	3	1	1	1	1	1	1	1	1	1	1	1 MP	1	3	0	0
5109	11	0	1	1	1	3	1	1	1	1	1	1	1	1	1	1	1 MP	1	5	3	0
5111	11	0	1	2	1	3	0	1	1	1	1	1	1	1	1	1	1 MP	1	4	0	0
5112	8	0	2	1	0	3	0	1	1	1	1	1	1	1	1	1	1 MP	1	5	14	1
5113	6	0	3	1	1	2	0	1	1	1	1	1	1	1	1	1	1 MP	2		0	0
5114	8	0	2	3	1	4	1	1	1	1	1	1	1	1	2	1	1 MP	1	3	1	0
5115	6	1	4	1	1	2	1	1	1	1	1	1	1	1	2	1	1 MP	1	5	0	0
5116	8	1	3	1	1	5	0	1	1	1	1	1	2	1	2	1	1 MP	1	3	3	0
5117	8	1	3	1	1	5	1	1	1	1	1	1	1	1	1	1	1 MP	1	4	0	0
5121	22	1	1	3	1	2	1	1	1	1	1	2	1	1	1	1	1 MP	1	3	0	0
5125	6	0	3	1	0	3	0	1	1	2	1	1	1	1	1	1	1 MP	1	2	2	0
5126	11	0	1	1	1	3	1	1	1	1	1	1	1	1	1	1	1 MP	1	4	0	0
5127	8	0	2	2	1	3	1	1	1	1	1	1	1	1	1	1	1 MP	1	3	2	0
5128	8	1	3	2	1	3	0	1	1	1	1	1	1	1	1	1	1 MP	1	4	0	0
5129	6	0	3	2	0	4	0	1	1	1	1	1	2	2	1	1	1 MP	2		0	0
5133	8	1	3	1	1	3	0	1	1	1	1	1	1	1	1	1	1 MP	1	3	0	0
5134	8	0	2	1	1	4	0	1	1	1	1	1	1	2	1	1	1 MP	1	3	0	0
5135	6	0	3	1	1	3	0	1	1	1	1	1	1	1	1	1	1 MP	1	3	2	0
5137	5	0	4	1	0	3	1	1	1	1	1	1	1	1	1	1	1 MP	1	4	3	0
5138	8	0	2	1	1	3	0	1	1	1	1	1	1	1	1	1	1 MP	1	3	0	0
5139	5	0	4	1	1	3	0	1	1	1	1	1	1	1	2	1	1 MP	1	2	0	0
5140	12	1	2	1	0	4	0	1	1	1	1	1	1	2	1	1	1 MP	2		0	0
5141	22	1	1	1	1	4	0	1	1	1	1	1	1	1	1	1	1 MP	1	4	0	0
5142	8	0	2	1	1	3	1	2	1	1	2	1	2	1	1	1	1 MP	1	3	1	0
5145	12	1	2	2	1	3	0	1	1	1	1	1	1	1	2	1	1 MP	1	3	0	0
5148	22	1	1	2	1	3	0	1	1	1	1	1	1	2	1	1	1 MP	1	4	0	0
5149	8	0	2	1	1	3	0	1	1	1	1	1	1	1	1	1	1 MP	1	3	0	0
5150	8	1	3	3	1	3	1	1	1	1	1	1	1	1	1	1	1 MP	1	4	0	0
5151	6	0	3	2	1	4	0	1	1	1	1	1	1	2	1	1	1 MP	1	3	2	0
5152	12	1	2	1	1	4	0	2	2	1	2	2	1	2	2	1	1 MP	1	3	1	0
5153	12	1	2	2	1	3	0	1	1	1	1	1	1	1	1	1	1 MP	1	3	1	0
5154	11	0	1	1	0	4	1	1	1	1	1	1	1	1	1	1	1 MP	1	4	2	0
5156	8	1	3	1		4	0	1	1	1	1	1	1	2	1	1	1 MP	1	5
5157	6	0	3	1	1	3	0	1	2	1	1	1	1	1	1	1	1 MP	1	3	2	0
5159	8	1	3	2	0	4	0	1	1	2	2	1	2	2	2	1	1 MP	1	4	0	0
5161	12	1	2	1	1	3	1	1	1	1	1	1	2	1	2	1	1 MP	1	3	0	0
5162	6	0	3	2	1	4	0	1	1	1	1	1	1	1	1	1	1 MP	1	3	0	0
5163	6	1	4	1	1	3	0	1	1	2	1	1	1	1	1	1	1 MP	1	3	0	0
5167	8	1	3	1	1	5	0	1	1	1	1	1	1	1	2	1	1 MP	1	3	0	0
5168	6	0	3	1	0	4	0	1	2	1	1	1	2	2	2	1	1 MP	1	5	5	0
5169	8	1	3	1	0	3	1	1	1	1	1	1	1	2	2	1	1 MP	1	3	0	0
5170	6	1	4	1	1	3	0	1	1	1	1	1	1	1	2	1	1 MP	1	3	1	0
5172	8	1	3	1	1	3	0	1	1	2	1	1	1	1	1	1	1 MP	1	3	2	0
5173	8	1	3	3	1	3	0	1	1	1	1	1	1	1	2	1	1 MP	1	3	1	0
5177	22	1	1	2	1	5	0	1	1	1	1	1	1	2	2	1	1 MP	1	4	0	0
5178	11	0	1	2	1	3	0	1	1	2	1	1	1	1	2	2	1 MP	1	3	0	0
5182	6	0	3	2	1	3	0	2	1	1	1	1	1	1	2	1	1 MP	2		1	0
5183	6	0	3	1	1	4	1	1	1	1	1	1	1	1	1	1	1 MP	1	3	0	0
5185	5	0	4	1	0	4	1	1	1	1	1	1	1	2	1	1	1 MP	1	4	0	0
5186	5	0	4	1	1	5	0	1	1	1	1	1	1	1	1	1	1 MP	1	2	2	0
5189	8	0	2	3	0	4	0	1	1	1	1	1	1	2	1	1	1 MP	1	5	0	0
5190	12	1	2	2	1	4	1	1	1	1	1	1	1	1	1	1	1 MP	1	3	1	0
5191	8	1	3	3	1	3	0	2	1	1	1	1	1	1	1	1	1 MP	1	2	0	0
5192	8	1	3	1	0	4	1	1	1	1	1	1	1	1	2	1	1 MP	1	5	9	1
5193	6	0	3	2	0	4	0	1	1	1	1	1	1	1	1	1	1 MP	1	4	13	1
5199	12	1	2	2	1	3	0	1	1	1	1	1	1	1	2	2	1 MP	2		0	0
5200	11	0	1	1	1	4	0	1	1	1	1	2	2	1	1	1	1 MP	1	5	1	0
5201	12	1	2	3	1	4	1	1	1	1	1	1	1	2	2	1	1 MP	1	3	0	0
5202	8	0	2	2	1	3	1	1	1	1	1	1	1	1	1	1	1 MP	1	5	0	0
5206	12	1	2	2	1	4	0	1	1	1	2	1	1	1	1	1	1 MP	1	3	0	0
5208	6	0	3	1	0	3	1	1	1	1	1	1	1	1	1	1	1 MP	1	5	3	0
5210	6	1	4	2	1	4	1	1	1	1	1	1	1	1	1	1	1 MP	1	3	2	0
5211	5	0	4	1	0	2	1	1	1	2	2	1	1	1	1	1	1 MP	1	4	0	0
5214	11	0	1	2	1	3	0	1	1	1	2	2	2	1	1	2	1 MP	1	3	0	0
5216	6	0	3	2	0	4	1	1	1	1	1	1	1	1	1	1	1 MP	1	3	0	0
5223	6	0	3	1	0	3	0	1	1	1	1	1	1	1	1	1	1 MP	1	3	0	0
5225	6	1	4	1	1	3	0	1	1	1	1	1	1	1	1	1	1 MP	1	3	3	0
5226	5	0	4	3	1	5	1	1	2	2	2	1	1	2	1	1	1 MP	1	3	3	0
5227	8	1	3	2	1	5	0	1	1	1	1	2	2	1	1	1	1 MP	1	3	1	0
5228	6	0	3	1	1	5	0	1	2	2	2	1	1	2	1	1	1 MP	1	3	0	0
5229	11	0	1	2	1	3	1	1	1	1	1	1	1	1	1	1	1 MP	1	3	0	0
5230	8	0	2	2	1	3	0	1	1	1	1	1	1	1	1	1	1 MP	1	3	0	0
5231	8	0	2	2	1	3	0	1	1	1	1	1	1	1	1	1	1 MP	1	3	0	0
5237	8	1	3	2	1	4	0	1	1	1	1	1	1	1	1	1	1 MP	2		1	0
5241	11	0	1	2	0	1	1	1	1	1	1	1	1	1	1	1	1 MP	1	3	9	1
5242	8	0	2	2	1	5	0	1	1	1	1	1	1	2	1	1	1 MP	1	4	0	0
5245	6	0	3	1	1	3	0	1	1	1	1	1	1	1	1	1	1 MP	1	3	2	0
5247	6	0	3	1	1	3	1	1	1	1	1	1	1	1	1	1	1 MP	1	2	0	0
5248	6	1	4	1	1	4	0	1	1	1	1	1	1	1	1	1	1 MP	1	2	0	0
5250	5	0	4	2	1	4	0	1	1	1	1	1	1	1	2	1	1 MP	1	3	1	0
5252	6	1	4	1	1	3	1	1	1	1	1	1	1	1	2	1	1 MP	1	3	2	0
5253	5	0	4	1	0	3	0	1	1	1	1	1	1	2	1	1	1 MP	1	5	4	0
5254	5	0	4	1	1	3	0	1	1	1	1	1	1	2	2	1	1 MP	1	3	0	0
5257	11	0	1	2	1	4	0	1	1	1	1	1	1	2	1	1	1 MP	2		3	0
5260	8	1	3	2	1	3	0	1	1	1	1	2	2	1	1	1	1 MP	1	5	0	0
5261	6	0	3	1	1	3	1	1	1	1	1	1	1	1	2	1	1 MP	1	3	0	0
5262	8	1	3	3	1	3	1	1	1	1	1	1	1	1	1	1	1 MP	1	3	0	0
5263	5	0	4	3	0	3	0	1	1	1	1	1	2	1	1	1	1 MP	1	5	0	0
5267	8	0	2	2	0	3	0	1	2	1	2	2	1	2	1	1	1 MP	1	3	9	1
5269	6	0	3	2	1	3	1	1	1	1	1	1	2	2	1	1	1 MP	1	3	0	0
5270	8	0	2	1	1	4	0	1	1	1	1	1	2	1	1	1	1 MP	1	3	0	0
5272	6	1	4	2	1	3	1	1	1	1	1	1	1	2	1	1	1 MP	1	3	0	0
5274	5	0	4	2	1	3	1	1	2	1	1	1	1	1	1	1	1 MP	1	3	16	1
5275	5	0	4	1	0	3	0	1	1	1	1	1	1	1	2	1	1 MP	1	3	7	0
5279	8	1	3	3	1	4	0	1	1	1	1	1	1	1	1	1	1 MP	2		0	0
5282	5	0	4	3	1	3	0	1	1	1	1	1	1	2	1	1	1 MP	1	2	1	0
5284	12	1	2	2	1	4	0	1	1	1	1	1	1	1	1	1	1 MP	1	3	3	0
5285	8	0	2	3	1	3	0	1	1	1	1	1	1	2	1	1	1 MP	1	2	2	0
5286	8	1	3	2	1	3	0	1	1	1	1	1	1	1	1	1	1 MP	2		0	0
5287	6	0	3	3	1	3	0	1	1	1	1	1	1	1	1	1	1 MP	1	3	4	0
5289	5	0	4	1	1	5	0	1	1	2	1	1	2	2	2	1	1 MP	1	3	2	0
5290	5	0	4	1	0	3	0	1	1	2	1	1	1	1	2	2	1 MP	1	3	0	0
5291	8	0	2	1	0	4	0	1	1	1	1	1	1	1	1	1	1 MP	1	3	0	0
5292	12	1	2	1	0	4	0	1	1	1	1	1	1	1	1	1	1 MP	1	5	0	0
5293	12	1	2	3	1	4	0	1	1	1	1	1	1	2	2	1	1 MP	1	4	1	0
5297	5	0	4	2	0	4	1	1	1	2	1	1	2	2	2	1	1 MP	1	3	1	0
5298	5	0	4	1	0	4	0	1	1	1	1	1	1	1	1	1	1 MP	2		12	1
5299	5	0	4	2	0	1	0	1	1	1	1	1	1	1	2	1	1 MP	1	3	1	0
5303	5	0	4	2	0	4	0	1	1	1	1	1	1	1	1		1 MP	1	3	5	0
5320	6	0	3	1	1	4	1	1	1	1	1	1	2	2	2	1	1 MP	1	3	0	0
5321	5	0	4	2	1	1	1	1	1	1	1	1	1	2	1	1	1 MP	1	2	2	0
5325	6	0	3	2	1	4	0	1	2	1	1	1	2	1	1	1	1 MP	1	3	0	0
5326	6	1	4	1	1	3	1	2	1	1	1	1	1	1	1	1	1 MP	1	3	0	0
5334	5	0	4	1	1	4	1	1	1	1	1	1	1	2	1	1	1 MP	1	2	0	0
5339	6	0	3	3	1	3	0	1	1	1	1	1	1	1	1	1	1 MP	1	3	0	0
5343	6	0	3	2	1	4	0	1	1	1	1	1	2	1	2	1	1 MP	1	4	0	0
5349	11	0	1	3	0	4	0	1	1	1	1	1	2	1	2	1	1 MP	1	3	0	0
5363	8	1	3	3	1	4	1	1	1	1	1	1	1	1	1	1	1 MP	1	3	0	0
5364	5	0	4	2	0	4	1	1	1	1	1	1	1	1	1	1	1 MP	1	3	1	0
5367	12	1	2	1	1	4	0	1	1	1	1	1	1	1	1	1	1 MP	1	3	1	0
5368	5	0	4	1	1	4	0	1	1	1	1	1	1	1	1	1	1 MP	1	3	0	0
5369	6	1	4	1	1	3	1	1	1	1	1	1	1	1	1	1	1 MP	1	5	0	0
5372	11	0	1	2	0	3	0	1	1	1	1	1	1	1	1	1	1 MP	1	3	7	0
5375	8	1	3	1	1	1	1	1	1	1	1	1	1	1	1	1	1 MP	1	3	2	0
5379	6	0	3	1	1	3	0	1	1	2	1	2	2	2	1	1	1 MP	1	3	0	0
5380	6	0	3	3	1	4	0	1	1	1	1	1	2	2	1	1	1 MP	1	3	6	0
5381	6	0	3	3	0	3	1	1	1	1	1	1	1	2	2	1	1 MP	1	3	0	0
5382	6	1	4	1	1	3	1	1	1	1	1	1	1	1	1	1	1 MP	1	2	0	0
5383	6	1	4	1	1	3	0	1	1	1	1	1	1	1	1	1	1 MP	1	3	8	1
5384	8	0	2	2	1	5	0	1	1	1	1	1	2	2	1	1	1 MP	1	3	2	0
5386	6	0	3	2	1	3	1	1	1	1	1	1	1	1	1	1	1 MP	1	3	11	1
5387	8	1	3	1	1	3	1	1	1	1	1	1	1	1	1	1	1 MP	1	3	6	0
5393	8	1	3	2	0	4	0	1	1	1	1	1	1	1	2	1	1 MP	1	5	2	0
5397	11	0	1	2	1	4	0	2	2	1	1	1	1	1	1	1	1 MP	1	5	2	0
5401	6	0	3	3	1	4	1	1	1	1	1	1	1	1	1	1	1 MP	1	3	2	0
5404	6	0	3	1	1	3	0	1	1	1	1	1	1	1	1	2	1 MP	1	5	1	0
5406	6	1	4	2	1	4	1	1	1	1	1	1	1	1	1	1	1 MP	1	3	1	0
5409	5	0	4	2	0	3	0	1	1	1	1	1	1	1	1	1	1 MP	1	5	3	0
5413	5	0	4	2	1	4	1	1	1	1	1	1	1	1	1	1	1 MP	1	2	3	0
5422	6	0	3	2	0	3	1	1	1	1	2	2	2	1	1	1	1 MP	1	2	9	1
5425	6	1	4	2	1	3	0	1	1	1	1	1	1	1	1	1	1 MP	1	3	0	0
5426	6	0	3	2	1	4	0	1	1	1	1	1	1	1	1	1	1 MP	2		0	0
5435	5	0	4	3	1	3	0	1	1	1	1	1	1	1	1	1	1 MP	1	2	5	0
5436	6	1	4	2	1	4	1	2	1	1	1	1	1	2	1	1	1 MP	2		2	0
5437	5	0	4	2	1	2	0	1	1	1	1	1	1	1	1	1	1 MP	1	3	1	0
5439	8	0	2	1	0	1	1	1	1	1	1	1	1	1	1	1	1 MP	1	2	6	0
5441	6	1	4	2	1	1	1	1	2	1	2	1	1	1	1	1	1 MP	1	2	12	1
5444	5	0	4	1	0	4	1	1	1	1	1	1	1	1	1	1	1 MP	2		14	1
5445	8	0	2	3	1	3	1	1	1	1	1	1	1	1	1	1	1 MP	1	2	0	0
5446	12	1	2	2	0	3	0	1	1	1	1	1	1	1	1	1	1 MP	1	3	0	0
5452	12	1	2	2	0	3	0	1	1	1	1	1	1	1	1	1	1 MP	1	5	3	0
5453	12	1	2	2	1	3	0	1	2	1	1	1	1	1	1	1	1 MP	1	5	11	1
5455	6	0	3	3	1	4	0	1	1	1	1	1	1	1	1	1	1 MP	1	2	2	0
5458	8	1	3	1	1	3	0	1	1	1	1	1	1	1	1	1	1 MP	1	5	0	0
5459	6	0	3	1	1	3	0	1	1	2	1	1	2	1	1	1	1 MP	1	5	2	0
5467	6	1	4	1	0	4	0	1	1	1	1	1	2	1	1	1	1 MP	1	4	2	0
5468	6	0	3	1	0	2	0	1	1	2	1	1	1	1	1	1	1 MP	1	4	12	1
5471	5	0	4	1	0	3	0	1	1	1	1	1	1	2	1	1	1 MP	1	4	0	0
5477	8	0	2	1	0	3	0	1	1	2	1	1	1	1	2	1	1 MP	1	3	6	0
5478	8	1	3	2	1	3	0	1	2	1	1	1	2	1	1	1	1 MP	1	2	3	0
5479	8	0	2	2	0	5	0	1	1	1	1	1	1	1	1	1	1 MP	2		0	0
5481	8	1	3	3	1	3	0	1	1	1	1	1	1	1	1	1	1 MP	2		5	0
5490	6	1	4	1	1	3	0	1	1	1	1	1	1	2	1	1	1 MP	1	3	0	0
5491	6	0	3	1	1	4	0	1	1	1	1	1	1	1	1	1	1 MP	1	2	0	0
5494	6	1	4	2	0	3	0	1	1	1	1	1	1	1	2	1	1 MP	1	4	2	0
5501	11	0	1	3	1	3	0	1	1	1	1	1	1	1	2	1	1 MP	1	4	5	0
5505	5	0	4	1	1	3	0	1	2	1	1	1	2	2	2	1	1 MP	1	2	0	0
5506	22	1	1	3	1	3	0	1	1	1	1	1	1	1	1	1	1 MP	2		0	0
5514	12	1	2	3	1	3	0	1	1	1	1	1	1	2	1	1	1 MP	1	5	0	0
5515	12	1	2	2	0	3	1	1	1	1	1	1	1	1	1	1	1 MP	1	3	0	0
5516	8	0	2	3	0	3	1	2	1	1	1	1	1	1	1	1	1 MP	1	2	3	0
5519	11	0	1	3	1	3	0	1	1	1	1	1	1	1	1	1	1 MP	1	3	2	0
5521	6	0	3	3	0	3	1	1	1	1	1	1	1	1	1	1	1 MP	1	3	0	0
5522	8	1	3	2	0	3	0	1	1	1	1	1	2	1	1	1	1 MP	1	5	2	0
5523	5	0	4	2	0	3	0	1	1	1	1	1	1	2	2	1	1 MP	1	3	2	0
5525	8	0	2	3	1	3	1	1	1	1	1	1	1	1	1	1	1 MP	1	3	10	1
5530	6	0	3	2	0	4	0	1	1	1	1	1	1	2	2	1	1 MP	1	1	0	0
5531	6	0	3	2	0	3	1	1	1	1	1	1	1	1	1	1	1 MP	1	3	1	0
5533	11	0	1	3	1	3	1	1	1	1	1	1	1	1	1	1	1 MP	1	5	3	0
5536	5	0	4	2	0	3	1	1	1	1	1	1	1	1	2	1	1 MP	1	5	3	0
5537	8	1	3	2	1	3	0	1	1	1	1	1	1	1	1	1	1 MP	1	3	0	0
5538	6	0	3	3	1	3	0	1	1	1	1	1	1	2	1	1	1 MP	1	3	4	0
5540	8	1	3	1	1	3	1	1	1	1	1	1	1	1	1	1	1 MP	1	5	0	0
5544	5	0	4	1	1	2	1	1	1	1	1	1	1	1	1	1	1 MP	1	3	2	0
5547	11	0	1	3	0	3	1	1	1	1	1	1	1	1	1	1	1 MP	1	3	3	0
5549	11	0	1	3	1	3	0	1	1	1	1	1	1	1	2	1	1 MP	2		1	0
5554	8	1	3	3	1	3	0	1	1	1	1	1	1	1	1	1	1 MP	1	3	1	0
5555	6	0	3	1	1	3	1	1	1	1	1	1	1	1	1	1	1 MP	1	5	20	1
5556	6	0	3	3	1	3	1	1	1	1	1	1	1	1	1	1	1 MP	1	3	14	1
5557	8	1	3	3	1	3	1	1	1	1	1	1	1	1	1	1	1 MP	1	4	7	0
5561	6	0	3	1	1	3	1	1	1	1	1	1	1	1	1	1	1 MP	1	3	15	1
5567	8	1	3	2	0	2	1	1	1	1	1	1	1	2	2	1	1 MP	1	3	2	0
5570	6	0	3	1	1	3	1	1	1	1	1	1	1	1	2	1	1 MP	1	2	13	1
5571	8	0	2	3	0	3	1	1	1	1	1	1	1	1	2	1	1 MP	1	3	0	0
5577	5	0	4	2	0	2	0	1	1	1	1	1	1	1	1	1	1 MP	1	2	0	0
5579	6	1	4	2	1	3	1	1	1	1	1	1	1	1	1	1	1 MP	1	4	0	0
5580	5	0	4	2	1	3	1	1	1	1	1	1	1	1	1	1	1 MP	1	2	2	0
5582	8	0	2	3	1	3	1	1	1	1	1	1	1	2	1	1	1 MP	1	2	0	0
5583	8	0	2	1	1	3	0	1	1	1	1	1	1	1	1	1	1 MP	1	3	4	0
5586	5	0	4	1	0	2	1	1	1	1	1	1	1	1	1	1	1 MP	1	2	0	0
5587	6	0	3	1	1	3	0	1	1	1	1	1	1	1	1	1	1 MP	1	3	1	0
5589	8	1	3	2	1	3	0	1	1	1	1	1	1	1	2	1	1 MP	1	1	1	0
5591	6	0	3	3	0	3	0	1	1	1	1	1	1	2	2	1	1 MP	1	4	0	0
5592	8	1	3	1	0	3	0	1	1	1	1	1	1	1	1	1	1 MP	1	3	0	0
5599	5	0	4	1	1	3	0	1	1	1	1	1	1	1	2	1	1 MP	1	3	3	0
5600	6	0	3	2	1	3	1	1	1	1	1	1	1	1	1	1	1 MP	1	5	5	0
5601	8	1	3	1	1	3	1	1	1	1	1	1	2	1	1	1	1 MP	1	3	0	0
5602	6	0	3	1	1	3	1	1	1	1	1	1	1	1	1	1	1 MP	1	4	0	0
5605	6	1	4	1	1	3	0	1	1	1	1	1	1	1	1	1	1 MP	1	3	0	0
5606	5	0	4	1	1	3	0	1	1	1	1	1	1	1	1	1	1 MP	1	3	1	0
5607	5	0	4	1	0	3	0	1	1	1	1	1	1	1	2	1	1 MP	1	2	1	0
5613	11	0	1	2	0	4	1	1	1	1	1	1	1	2	1	1	1 MP	1	1	0	0
5614	6	0	3	1	1	3	1	1	1	1	1	1	1	2	2	1	1 MP	1	3	3	0
5615	6	1	4	1	1	3	1	1	1	1	1	1	1	1	1	1	1 MP	1	3	0	0
5618	6	0	3	1	0	3	1	1	1	1	1	1	1	1	1	1	1 MP	1	4	2	0
5619	6	1	4	1	1	3	1	1	1	1	1	1	1	1	2	1	1 MP	1	1	0	0
5621	5	0	4	1	0	2	0	1	1	1	1	1	1	1	1	1	1 MP	1	1	0	0
5622	5	0	4	3	1	3	0	1	1	1	1	1	1	1	1	2	1 MP	1	1	13	1
5624	11	0	1	3	0	3	0	1	1	1	1	1	1	1	2	1	1 MP	1	3	8	1
5625	5	0	4	1	0	2	1	1	1	1	1	1	1	1	1	1	1 MP	1	2	12	1
5626	22	1	1	1	1	3	1	1	1	1	1	1	1	1	1	1	1 MP	1	3	1	0
5627	8	0	2	1	0	2	1	1	1	1	1	1	1	1	1	1	1 MP	1	4	4	0
5628	8	1	3	2	0	4	0	2	1	1	1	1	1	1	1	1	1 MP	1	2	1	0
5632	11	0	1	2	0	3	0	2	1	2	1	1	1	1	1	1	1 MP	1	1	7	0
5633	11	0	1	3	1	4	0	1	1	1	1	1	1	1	1	1	1 MP	1	1	1	0
5636	8	0	2	2	0	2	0	1	1	1	1	1	1	1	1	1	1 MP	1	3	4	0
5637	6	1	4	2	0	2	0	1	1	1	1	1	1	1	2	1	1 MP	2		1	0
5638	11	0	1	2	0	1	0	1	1	1	1	1	1	1	2	1	1 MP	1	3	10	1
5639	8	0	2	2	0	2	0	1	1	2	1	1	1	1	2	1	1 MP	1	1	13	1
5640	8	1	3	1	1	4	1	1	1	1	1	1	1	1	1	1	1 MP	1	4	11	1
5641	11	0	1	3	1	3	1	1	1	1	1	1	1	1	1	1	1 MP	1	2	0	0
5647	5	0	4	2	1	3	1	1	1	1	1	1	1	1	1	1	1 MP	1	3	0	0
5648	5	0	4	1	0	3	1	1	1	1	1	1	1	1	1	1	1 MP	2		4	0
5652	5	0	4	1	0	3	1	1	1	1	1	1	1	1	1	1	1 MP	1	3	1	0
5657	6	0	3	1	0	3	1	1	1	1	1	1	1	1	1	1	1 MP	1	3	4	0
5658	8	1	3	1	0	1	0	1	1	1	1	1	1	1	2	1	1 MP	2		1	0
5659	5	0	4	1	0	4	1	1	1	1	1	1	1	1	1	1	1 MP	1	3	7	0
5661	5	0	4	1	0	3	1	1	1	1	1	1	1	1	1	1	1 MP	1	3	4	0
5666	6	0	3	1	0	4	0	1	1	1	1	1	1	1	1	1	1 MP	1	4	4	0
5667	6	0	3	3	0	3	0	1	1	1	1	1	1	1	1	1	1 MP	1	3	0	0
5669	5	0	4	1	0	3	0	1	1	1	1	1	1	2	2	1	1 MP	1	4	0	0
5670	5	0	4	1	1	3	1	1	1	1	1	1	1	1	1	1	1 MP	1	3	0	0
5672	5	0	4	2	1	3	1	1	1	1	1	1	1	1	1	1	1 MP	1	3	0	0
5675	5	0	4	1	1	3	0	1	1	1	1	1	1	1	1	1	1 MP	1	4	1	0
5679	8	1	3	2	1	3	1	1	1	1	1	1	1	2	1	1	1 MP	2		0	0
5682	8	0	2	2	0	3	1	1	1	1	1	1	1	1	1	1	1 MP	1	5	11	1
5683	6	0	3	2	1	3	1	1	1	1	1	1	1	1	1	1	1 MP	1	4	2	0
5684	8	1	3	1	1	3	1	1	1	1	1	1	1	1	1	1	1 MP	1	4	1	0
5687	5	0	4	1	0	3	0	1	1	1	1	1	1	1	1	1	1 MP	1	2	15	1
5688	22	1	1	2	0	3	1	1	1	1	1	1	1	1	1	1	1 MP	1	4	0	0
5691	8	0	2	3	1	4	0	1	1	1	1	1	1	1	1	1	1 MP	1	1	3	0
5693	8	1	3	2	1	3	1	1	1	1	1	1	1	1	1	1	1 MP	1	4	0	0
5694	5	0	4	1	1	5	0	1	1	2	1	1	2	2	1	1	1 MP	1	2	1	0
5695	6	1	4	1	1	2	0	1	1	1	1	1	1	1	1	1	1 MP	1	3	3	0
5698	11	0	1	3	1	3	0	1	1	1	1	1	1	2	1	1	1 MP	1	2	4	0
5701	12	1	2	1	1	3	0	1	1	1	1	1	1	1	2	1	1 MP	1	3	0	0
5703	11	0	1	2	0	4	0	1	1	1	1	1	1	1	2	1	1 MP	1	5	0	0
5704	12	1	2	3	1	3	0	1	1	2	1	1	1	1	1	1	1 MP	1	4	4	0
5706	22	1	1	2	1	2	1	1	1	1	1	1	1	1	1	1	1 MP	1	3	0	0
5716	8	0	2	2	1	2	0	1	1	1	1	1	1	1	1	1	1 MP	1	3	1	0
5722	6	0	3	2	0	4	0	1	1	1	1	1	1	1	1	1	1 MP	1	5	4	0
5727	8	0	2	1	0	4	0	1	1	1	1	1	1	1	1	1	1 MP	1	4	0	0
5736	12	1	2	1	1	3	0	1	2	1	1	1	1	2	1	1	1 MP	1	3	0	0
5737	8	0	2	1	0	5	0	1	1	1	1	1	1	2	2	1	1 MP	1	4	1	0
5742	6	0	3	3	1	2	0	1	1	2	1	1	2	1	2	1	1 MP	1	3	1	0
5743	6	0	3	1	1	2	0	1	1	1	1	1	1	1	1	1	1 MP	1	5	1	0
5745	6	0	3	2	0	2	0	1	1	1	1	1	1	1	1	1	1 MP	1	1	1	0
5748	6	1	4	1	0	3	0	1	1	1	1	1	2	1	2	1	1 MP	1	2	1	0
5749	22	1	1	2	1	2	0	1	1	1	1	1	1	2	1	1	1 MP	2		4	0
5752	6	0	3	1	1	2	1	1	1	1	1	1	1	1	1	1	1 MP	1	3	1	0
5755	22	1	1	3	1	3	1	1	1	1	1	1	1	1	1	1	1 MP	1	3	2	0
5757	5	0	4	1	0	1	0	1	1	1	1	1	2	1	2	1	1 MP	1	1	0	0
5758	8	0	2	3	1	4	0	1	1	1	1	1	1	1	1	1	1 MP	1	3	0	0
5759	8	0	2	2	1	2	0	1	1	1	1	1	1	1	2	1	1 MP	1	5	0	0
5762	8	1	3	1	1	4	1	1	1	1	1	1	1	1	1	1	1 MP	1	2	2	0
5763	22	1	1	2	1	3	0	1	1	2	1	1	1	1	1	1	1 MP	1	4	0	0
5764	5	0	4	1	0	2	1	1	1	1	1	1	1	2	1	1	1 MP	1	4	0	0
5765	8	0	2	1	1	4	1	1	1	1	1	1	1	1	1	1	1 MP	1	2	0	0
5770	8	0	2	2	1	3	1	1	1	1	1	1	2	1	1	1	1 MP	2		0	0
5773	6	0	3	1	1	3	1	1	1	1	1	1	2	1	1	1	1 MP	1	3	0	0
5774	6	1	4	1	1	3	1	1	2	1	1	1	1	1	1	1	1 MP	1	3	0	0
5783	5	0	4	1	0	2	1	1	1	1	1	1	2	1	1	1	1 MP	1	2	0	0
5786	5	0	4	1	0	3	1	1	1	1	1	1	1	1	1	1	1 MP	1	3	6	0
5788	8	1	3	2	1	2	0	1	1	1	1	1	1	1	1	1	1 MP	1	3	0	0
5793	6	0	3	1	1	3	0	2	1	1	2	1	1	1	1	1	1 MP	1	3	0	0
5797	8	1	3	1	1	3	1	1	1	1	2	2	2	2	2	1	1 MP	1	4	2	0
5798	6	1	4	1	1	2	0	1	1	1	1	1	1	1	1	1	1 MP	1	2	4	0
5799	5	0	4	1	1	3	0	1	1	1	1	1	1	2	1	1	1 MP	1	2	2	0
5800	8	1	3	1	1	3	1	1	1	1	1	1	1	1	1	1	1 MP	1	4	2	0
5803	8	0	2	1	0	3	0	1	1	1	1	1	1	1	1	1	1 MP	1	2	1	0
5811	5	0	4	1	1	2	1	1	1	1	1	1	1	1	1	1	1 MP	1	3	0	0
5813	6	1	4	1	1	4	0	1	1	1	1	1	1	1	1	1	1 MP	1	3	4	0
5815	12	1	2	1	1	2	1	1	1	1	1	1	1	1	1	1	1 MP	1	4	3	0
5816	8	1	3	2	1	3	1	1	1	1	1	1	1	1	2	1	1 MP	1	3	0	0
5817	6	0	3	3	1	3	0	1	1	2	1	1	1	1	2	1	1 MP	1	2	0	0
5834	11	0	1	3	1	3	0	1	1	1	1	1	1	2	2	1	1 MP	1	3	1	0
5840	11	0	1	2	1	3	0	1	1	1	1	1	2	1	1	1	1 MP	1	4	0	0
5841	8	1	3	1	1	2	1	1	1	1	1	1	1	1	1	1	1 MP	1	4	0	0
5843	6	0	3	1	1	4	0	1	1	1	1	1	1	1	1	1	1 MP	1	3	0	0
5844	6	1	4	1	1	4	0	1	1	2	1	1	1	1	1	1	1 MP	1	3	0	0
5846	8	0	2	1	0	2	1	1	1	1	1	1	1	1	2	1	1 MP	1	4	0	0
5850	12	1	2	1	1	2	0	1	1	1	1	1	1	1	1	1	1 MP	1	4	1	0
5851	8	1	3	1	0	3	0	1	1	1	1	1	1	1	2	1	1 MP	2		2	0
5855	11	0	1	3	1	4	0	1	2	2	1	1	1	2	1	1	1 MP	1	3	0	0
5856	11	0	1	1	0	2	0	1	1	2	1	1	1	2	2	1	1 MP	1	3	0	0
5859	6	0	3	1	0	3	0	1	1	1	1	1	1	1	2	1	1 MP	1	5	0	0
5860	5	0	4	1	1	3	0	1	1	2	1	1	1	1	1	1	1 MP	1	3	0	0
5861	8	1	3	1	1	3	0	1	1	1	1	2	2	1	2	1	1 MP	2		2	0
5862	8	1	3	1	1	3	0	1	1	1	1	1	1	1	1	1	1 MP	1	4	3	0
5863	6	0	3	2	1	2	1	1	1	1	2	1	1	1	1	1	1 MP	1	4	0	0
5864	6	0	3	2	0	4	0	1	1	1	1	1	1	1	1	1	1 MP	1	3	3	0
5868	22	1	1	2	1	3	1	1	1	1	1	1	1	1	2	1	1 MP	1	3	1	0
5869	6	0	3	1	0	4	0	1	1	2	1	1	1	1	2	1	1 MP	1	3	0	0
5873	5	0	4	1	0	4	0	1	1	1	1	1	1	1	1	1	1 MP	1	4	0	0
5874	5	0	4	1	0	2	0	1	1	2	1	1	1	1	1	1	1 MP	1	2	2	0
5877	6	0	3	1	0	3	0	1	1	2	1	1	1	1	1	1	1 MP	1	3	3	0
5878	6	0	3	2	0	3	1	1	1	1	1	1	1	1	1	1	1 MP	1	4	0	0
5880	8	1	3	1	1	4	0	1	1	1	1	1	1	2	1	1	1 MP	1	3	1	0
5881	5	0	4	1	1	3	1	1	1	1	1	1	1	1	1	1	1 MP	1	4	0	0
5890	5	0	4	1	1	3	0	1	1	1	1	1	1	1	1	1	1 MP	1	3	1	0
5892	6	0	3	1	1	3	1	1	1	1	1	1	1	1	1	1	1 MP	1	3	3	0
5893	11	0	1	2	1	3	1	1	1	1	1	1	1	1	1	1	1 MP	1	3	0	0
5894	8	0	2	1	0	3	0	1	1	1	1	1	1	1	1	1	1 MP	1	4	0	0
5904	8	0	2	3	1	3	1	1	1	1	1	1	1	1	1	1	1 MP	1	5	0	0
5906	8	1	3	1	1	2	1	1	1	1	1	1	1	1	1	1	1 MP	2		0	0
5907	11	0	1	1	0	2	0	1	1	1	1	1	1	1	1	1	1 MP	2		1	0
5910	11	0	1	1	1	3	0	1	1	1	1	1	1	1	1	1	1 MP	1	3	0	0
5923	12	1	2	3	0	2	0	1	1	1	1	1	1	2	1	1	1 MP	1	3	9	1
5924	12	1	2	3	1	2	0	1	1	1	1	1	1	1	1	1	1 MP	2		0	0
5930	12	1	2	2	1	3	0	1	1	1	1	1	1	1	1	1	1 MP	2		2	0
5932	8	1	3	1	1	2	0	1	1	1	1	1	1	1	1	1	1 MP	2		0	0
5935	22	1	1	1	1	3	0	1	1	1	1	1	1	1	1	1	1 MP	1	4	0	0
5936	11	0	1	2	1	4	0	1	1	1	1	1	1	1	1	1	1 MP	1	3	2	0
5939	8	1	3	1	1	2	1	1	1	1	1	1	1	1	1	1	1 MP	1	5	0	0
5940	6	0	3	1	1	2	0	1	1	1	1	1	1	1	1	1	1 MP	1	5	0	0
5941	8	1	3	1	0	3	1	1	2	1	1	1	1	1	1	1	1 MP	1	3	0	0
5945	11	0	1	2	1	2	0	1	1	1	1	1	1	1	1	1	1 MP	1	3	4	0
5949	6	0	3	1	0	3	1	1	1	1	1	1	2	1	2	1	1 MP	1	4	3	0
5950	11	0	1	1	0	2	1	1	1	1	1	1	1	1	1	1	1 MP	1	3	0	0
5952	8	0	2	1	1	1	0	1	1	1	1	1	1	1	1	1	1 MP	1	2	8	1
5953	6	0	3	2	1	2	1	1	1	1	1	1	1	1	1	1	1 MP	1	1	6	0
5954	6	0	3	1	1	2	0	1	2	1	1	1	1	1	1	1	1 MP	1	2	0	0
5958	11	0	1	2	1	3	1	1	1	1	1	1	1	1	1	1	1 MP	1	5	1	0
5960	22	1	1	1	1	2	0	1	2	1	1	1	1	1	1	1	1 MP	1	4	0	0
5962	12	1	2	1	0	3	0	1	1	1	1	1	1	1	2	1	1 MP	1	5	0	0
5965	8	0	2	2	1	2	1	1	1	1	1	1	1	1	2	1	1 MP	1	3	0	0
5967	8	1	3	2	0	2	0	1	2	1	1	1	1	1	2	1	1 MP	1	3	0	0
5968	6	0	3	1	1	1	0	2	2	1	1	1	1	1	1	1	1 MP	1	2	1	0
5969	6	1	4	1	0	3	0	1	1	1	1	1	1	1	1	1	1 MP	1	5	0	0
5973	8	0	2	1	1	2	0	1	1	1	1	1	1	1	1	1	1 MP	1	4	1	0
5976	11	0	1	1	1	2	1	1	1	1	1	1	1	1	1	1	1 MP	1	4	5	0
5979	11	0	1	1	1	3	0	1	2	1	1	1	1	1	1	1	1 MP	1	2	4	0
5981	8	0	2	1	0	2	1	2	1	1	1	2	1	1	1	1	1 MP	1	2	4	0
5982	6	0	3	1	1	3	1	1	1	1	1	1	1	2	1	1	1 MP	1	3	1	0
5983	6	1	4	1	1	3	1	1	1	1	1	1	1	1	2	1	1 MP	2		0	0
5984	6	0	3	1	0	3	1	1	1	1	1	1	2	1	1	1	1 MP	1	2	1	0
5985	6	0	3	1	0	2	1	1	1	1	1	1	1	1	1	1	1 MP	1	2	0	0
5986	6	0	3	1	0	3	0	2	2	1	1	1	2	1	1	1	1 MP	1	1	0	0
5988	5	0	4	1	0	5	0	1	1	1	1	1	2	1	1	1	1 MP	1	2	1	0
5989	22	1	1	2	1	3	0	2	1	1	1	2	2	1	1	1	1 MP	2		1	0
5990	22	1	1	2	1	1	0	1	1	1	1	1	1	1	1	1	1 MP	1	4	0	0
5991	8	0	2	1	1	3	0	1	2	1	1	1	1	2	1	1	1 MP	1	2	0	0
5993	6	0	3	1	1	4	0	1	1	1	1	1	1	1	1	1	1 MP	1	3	1	0
5994	8	1	3	3	1	3	0	1	1	1	1	1	1	1	1	1	1 MP	1	2	0	0
5995	5	0	4	1	1	3	0	1	1	1	1	1	1	1	1	1	1 MP	1	3	9	1
5997	12	1	2	1	1	4	0	1	1	1	1	1	2	2	1	1	1 MP	1	4	0	0
5998	6	1	4	1	0	4	1	1	1	1	1	2	1	2	1	1	1 MP	1	4	3	0
6001	11	0	1	1	1	3	0	1	2	1	1	1	1	1	1	1	1 MP	1	3	0	0
6003	8	0	2	1	1	3	0	1	1	2	1	1	2	1	1	1	1 MP	1	3	1	0
6005	12	1	2	2	0	3	0	1	1	1	1	1	1	1	1	1	1 MP	1	3	0	0
6007	8	1	3	1	1	5	0	2	1	1	1	1	2	1	1	1	1 MP	1	3	1	0
6009	11	0	1	2	1	3	0	1	1	2	1	1	2	1	1	1	1 MP	1	4	1	0
6010	11	0	1	1	1	3	0	1	1	1	1	1	1	1	1	1	1 MP	1	3	0	0
6011	8	0	2	1	1	3	0	1	1	1	1	1	1	1	1	1	1 MP	1	3	2	0
6012	12	1	2	1	0	3	0	1	1	1	2	1	1	1	2	1	1 MP	1	3	0	0
6013	6	0	3	1	1	3	0	1	1	1	1	1	1	1	1	1	1 MP	1	2	3	0
6016	6	0	3	1	1	3	0	1	1	2	1	1	1	1	1	1	1 MP	1	2	1	0
6017	8	1	3	1	1	2	0	1	1	1	1	1	1	1	1	1	1 MP	1	3	4	0
6018	8	1	3	1	1	3	0	1	1	1	1	1	1	1	1	1	1 MP	1	3	4	0
6019	5	0	4	2	1	4	0	1	1	1	1	1	1	1	2	1	1 MP	1	3	3	0
6020	6	0	3	1	1	3	0	1	1	1	1	1	1	1	1	1	1 MP	1	2	0	0
6023	6	1	4	1	1	2	1	1	1	1	1	1	1	1	2	2	1 MP	1	2	1	0
6024	5	0	4	1	0	2	0	1	1	1	1	1	1	1	1	1	1 MP	1	3	27	1
6025	6	1	4	1	1	3	0	2	1	1	1	1	1	1	1	1	1 MP	1	3	3	0
6026	6	0	3	1	0	3	1	1	1	1	1	1	1	1	1	1	1 MP	1	3	0	0
6027	8	0	2	2	1	2	0	1	1	1	1	1	1	1	1	1	1 MP	1	3	0	0
6029	8	1	3	1	1	4	0	1	1	1	1	1	1	2	2	1	1 MP	1	3	1	0
6031	5	0	4	1	0	2	1	1	1	2	1	1	1	1	1	1	1 MP	1	2	2	0
6032	11	0	1	1	0	3	1	1	1	1	1	1	1	1	1	1	1 MP	1	3	1	0
6033	11	0	1	2	1	4	0	1	1	1	1	1	1	1	1	1	1 MP	1	2	1	0
6035	6	0	3	1	0	3	0	2	1	1	1	1	2	2	2	1	1 MP	1	2	0	0
6036	5	0	4	1	0	3	0	1	2	1	1	1	2	1	2	1	1 MP	1	2	6	0
6038	6	1	4	1	1	3	0	1	1	1	1	1	2	1	2	1	1 MP	1	4	2	0
6039	5	0	4	1	1	3	0	1	1	1	1	1	1	1	1	1	1 MP	1	3	2	0
6040	8	1	3	1	0	4	1	1	1	1	1	1	1	1	1	1	1 MP	1	5	7	0
6041	11	0	1	1	1	4	0	1	1	1	1	1	1	1	1	1	1 MP	1	3	0	0
6042	12	1	2	1	1	3	1	1	1	1	1	1	1	1	1	1	1 MP	1	3	0	0
6043	11	0	1	1	0	5	0	1	1	1	1	1	2	2	1	1	1 MP	1	2	1	0
6044	8	0	2	1	1	3	0	1	1	1	1	1	1	1	1	1	1 MP	1	1	3	0
6046	8	1	3	1	0	3	1	1	1	1	1	1	1	1	1	1	1 MP	1	4	0	0
6047	6	1	4	1	0	2	0	1	1	1	1	1	1	1	1	1	1 MP	1	3	2	0
6054	6	0	3	1	0	3	0	1	1	1	1	1	1	1	1	1	1 MP	1	2	4	0
6055	11	0	1	1	1	3	0	1	1	2	1	1	1	1	2	1	1 MP	1	3	7	0
6057	8	0	2	1	0	3	0	1	1	1	1	1	1	1	1	1	1 MP	1	3	0	0
6059	6	0	3	1	1	4	1	1	1	1	1	1	1	1	1	1	1 MP	1	2	3	0
6060	5	0	4	1	0	4	0	1	1	2	1	1	1	1	2	2	1 MP	1	3	3	0
6061	6	1	4	1	1	3	0	1	1	2	1	1	1	1	2	1	1 MP	1	4	9	1
6063	8	1	3	1	1	3	1	1	1	1	1	1	1	1	1	1	1 MP	1	3	1	0
6064	5	0	4	1	0	3	0	1	1	1	1	1	1	1	1	1	1 MP	1	2	0	0
6066	8	1	3	2	1	4	0	1	1	1	1	1	1	1	2	1	1 MP	1	1	0	0
6067	8	1	3	1	1	3	0	1	1	1	1	1	1	1	1	1	1 MP	1	3	0	0
6068	6	0	3	1	1	4	0	2	2	1	1	1	1	2	1	1	1 MP	1	3	8	1
6069	8	1	3	2	1	3	0	1	1	1	1	1	1	1	1	1	1 MP	1	4	0	0
6071	11	0	1	1	0	3	0	1	1	1	1	2	2	2	1	1	1 MP	1	4	5	0
6072	12	1	2	2	1	3	0	1	1	1	1	1	1	1	1	1	1 MP	2		0	0
6074	8	1	3	3	0	3	0	1	1	2	1	1	1	1	1	1	1 MP	2		3	0
6075	6	0	3	2	1	4	0	2	1	1	1	2	2	2	1	1	1 MP	1	2	0	0
6077	5	0	4	1	0	4	0	1	1	1	1	1	1	1	2	1	1 MP	1	3	2	0
6078	5	0	4	1	0	2	1	2	1	1	1	1	1	1	2	1	1 MP	1	4	1	0
6080	11	0	1	1	1	3	0	1	1	1	1	1	2	1	1	1	1 MP	1	5	5	0
6082	12	1	2	1	0	2	1	1	1	1	1	1	1	1	1	1	1 MP	2		2	0
6086	8	0	2	1	0	4	0	1	1	1	1	1	1	2	1	1	1 MP	1	3	2	0
6087	12	1	2	3	0	3	1	1	1	1	1	1	1	1	1	1	1 MP	1	2	3	0
6089	11	0	1	3	1	4	0	1	1	1	1	1	1	2	1	1	1 MP	1	3	0	0
6090	6	0	3	1	1	4	0	1	1	1	1	1	1	2	2	1	1 MP	1	3	0	0
6091	8	1	3	1	1	4	1	1	2	1	1	1	1	1	1	1	1 MP	1	4	0	0
6092	8	1	3	2	1	1	0	1	1	1	1	1	1	1	1	1	1 MP	1	3	0	0
6093	8	0	2	1	0	3	1	1	1	1	1	1	2	1	1	1	1 MP	1	4	0	0
6095	8	1	3	2	1	4	0	1	1	1	1	1	1	1	1	1	1 MP	1	2	3	0
6096	6	1	4	1	1	3	1	1	1	1	1	1	2	2	2	1	1 MP	1	3	1	0
6098	8	0	2	2	1	3	0	1	1	1	1	1	1	1	2	1	1 MP	1	4	12	1
6099	6	0	3	1	0	3	0	1	1	1	1	1	1	1	1	1	1 MP	1	3	1	0
6100	6	0	3	1	0	2	0	1	1	1	1	1	2	1	2	1	1 MP	1	5	0	0
6102	22	1	1	1	1	4	0	1	1	1	2	1	2	2	1	1	1 MP	1	3	2	0
6103	8	0	2	1	1	3	0	1	2	1	1	1	2	1	1	1	1 MP	1	3	5	0
6105	6	1	4	2	1	5	0	1	1	1	1	1	1	1	1	1	1 MP	1	3	0	0
6107	22	1	1	2	1	2	0	1	2	2	1	1	1	1	1	1	1 MP	1	3	0	0
6108	6	0	3	1	1	3	0	1	1	1	1	1	1	1	1	1	1 MP	2		1	0
6109	8	0	2	1	0	3	0	1	1	1	1	1	1	1	1	1	1 MP	1	3	11	1
6111	12	1	2	2	0	3	1	1	1	1	1	1	1	1	2	1	1 MP	1	3	0	0
6112	8	1	3	1	1	3	0	1	1	1	1	1	1	1	1	1	1 MP	1	1	0	0
6113	6	0	3	1	1	4	1	1	1	1	1	1	1	1	1	1	1 MP	1	1	3	0
6115	8	1	3	1	1	3	0	1	1	1	1	1	1	1	1	1	1 MP	1	5	2	0
6117	6	0	3	3	1	3	0	1	1	1	1	1	1	1	1	1	1 MP	1	4	0	0
6118	8	1	3	2	1	3	0	2	2	1	1	1	2	2	1	1	1 MP	1	5	0	0
6119	6	0	3	1	1	4	0	1	1	1	1	1	1	1	1	1	1 MP	1	3	7	0
6120	8	1	3	1	1	4	1	1	1	1	2	1	1	1	1	1	1 MP	1	3	0	0
6121	11	0	1	2	0	5	0	2	1	1	1	1	2	2	1	1	1 MP	1	3	3	0
6123	8	0	2	1	1	3	1	1	1	1	1	1	2	2	1	1	1 MP	1	2	5	0
6125	8	0	2	1	1	3	1	1	1	1	1	1	1	1	2	1	1 MP	1	1	9	1
6128	12	1	2	1	0	4	0	1	1	1	1	1	1	1	2	2	1 MP	1	5	3	0
6130	5	0	4	1	1	3	1	1	1	1	1	1	1	2	1	1	1 MP	1	3	5	0
6131	8	1	3	1	1	3	1	1	1	1	1	1	1	1	1	1	1 MP	1	5	0	0
6133	11	0	1	1	1	3	0	1	1	1	1	1	1	1	2	1	1 MP	1	3	1	0
6136	8	1	3	1	0	4	0	1	1	1	1	1	1	2	1	1	1 MP	1	5	8	1
6137	8	1	3	1	0	3	1	1	1	1	1	1	2	2	1	1	1 MP	2		0	0
6138	6	1	4	1	0	3	0	1	1	1	1	1	1	1	2	1	1 MP	2		5	0
6139	11	0	1	1	1	3	0	1	1	1	1	1	1	1	1	1	1 MP	1	5	0	0
6142	6	0	3	2	1	4	0	1	2	2	1	1	1	2	2	1	1 MP	1	2	2	0
6145	8	0	2	2	1	3	0	1	1	1	1	1	1	1	1	1	1 MP	1	3	3	0
6146	6	0	3	2	1	2	0	1	1	1	1	1	1	1	1	1	1 MP	1	3	0	0
6147	8	1	3	1	1	4	0	1	1	1	1	1	1	1	1	1	1 MP	1	3	2	0
6148	6	1	4	1	1	2	1	1	1	1	1	1	1	1	1	1	1 MP	1	4	2	0
6151	12	1	2	1	1	3	0	1	1	1	1	1	1	1	1	1	1 MP	1	3	2	0
6152	8	0	2	2	1	3	0	1	1	1	1	1	2	1	1	1	1 MP	1	5	2	0
6154	8	0	2	2	1	3	0	1	2	1	1	1	1	1	1	1	1 MP	1	5	0	0
6155	6	0	3	2	0	3	0	2	1	1	1	1	1	1	1	1	1 MP	1	3	0	0
6157	6	0	3	1	1	1	1	1	2	1	1	1	1	1	1	1	1 MP	1	4	0	0
6158	8	1	3	1	1	3	0	1	1	1	1	1	1	1	1	1	1 MP	1	4	0	0
6161	8	0	2	2	0	1	0	1	1	2	1	1	1	1	1	2	1 MP	1	5	4	0
6164	12	1	2	2	1	2	0	1	1	1	1	1	1	1	1	2	1 MP	1	4	0	0
6167	5	0	4	1	0	3	0	2	1	1	1	1	2	1	1	1	1 MP	2		3	0
6168	22	1	1	3	1	3	1	2	1	1	1	1	1	1	1	1	1 MP	1	3	0	0
6169	8	0	2	2	0	2	0	2	1	1	1	1	1	1	1	1	1 MP	1	2	5	0
6172	5	0	4	1	0	3	1	1	1	1	1	1	1	2	1	1	1 MP	1	3	0	0
6174	8	0	2	2	0	3	1	1	1	1	1	1	1	1	2	1	1 MP	1	3	6	0
6185	6	0	3	1	0	3	0	1	2	1	1	1	1	1	1	1	1 MP	1	3	0	0
6189	8	0	2	1	1	3	1	1	1	1	1	1	1	1	2	1	1 MP	1	2	4	0
6190	8	1	3	1	1	3	0	1	2	1	1	1	1	1	1	1	1 MP	1	1	0	0
6193	8	0	2	2	0	1	0	2	2	1	1	1	1	1	1	1	1 MP	1	5	3	0
6195	11	0	1	1	0	2	1	1	2	1	1	1	1	1	2	1	1 MP	1	5	0	0
6196	22	1	1	1	1	2	1	1	2	1	1	1	1	1	1	1	1 MP	1	4	0	0
6199	8	1	3	1	1	3	0	1	1	1	1	1	1	1	2	2	1 MP	1	3	2	0
6201	11	0	1	1	0	3	0	2	1	1	1	1	1	1	2	1	1 MP	2		8	1
6203	11	0	1	1	1	3	0	1	1	1	1	1	1	1	1	1	1 MP	1	2	2	0
6208	8	1	3	1	0	3	0	1	1	1	1	1	1	1	1	1	1 MP	1	3	0	0
6209	6	0	3	2	1	3	0	1	1	1	1	1	1	1	1	1	1 MP	1	2	2	0
6210	8	1	3	1	1	4	0	1	1	2	1	1	1	1	2	2	1 MP	1	2	0	0
6213	8	1	3	1	1	5	1	1	1	1	1	1	2	1	2	1	1 MP	1	5	3	0
6214	6	0	3	1	1	4	0	1	1	1	1	1	1	1	2	1	1 MP	1	3	0	0
6217	6	0	3	1	0	4	0	1	1	1	1	1	1	1	1	1	1 MP	1	4	7	0
6218	6	1	4	1	1	3	0	1	1	1	1	1	1	1	2	2	1 MP	1	4	0	0
6220	11	0	1	2	1	4	1	1	1	1	1	1	2	1	1	1	1 MP	1	5	3	0
6222	6	0	3	1	1	3	1	2	1	1	1	1	1	1	1	1	1 MP	1	2	3	0
6229	22	1	1	2	1	5	0	2	2	1	1	2	2	2	2	1	1 MP	1	3	0	0
6230	22	1	1	1	0	4	1	1	1	1	2	2	1	2	2	1	1 MP	1	2	0	0
6231	11	0	1	1	1	3	0	1	1	1	2	1	1	1	1	1	1 MP	1	3	4	0
6233	8	0	2	3	1	4	0	1	1	1	1	1	1	1	2	1	1 MP	1	3	3	0
6234	8	0	2	2	1	4	0	1	2	1	1	1	1	2	1	1	1 MP	1	3	2	0
6235	8	0	2	1	1	4	1	1	2	1	1	1	2	1	1	1	1 MP	1	3	3	0
6236	8	1	3	1	1	4	1	1	1	2	1	1	1	1	1	1	1 MP	1	3	2	0
6237	8	1	3	1	1	3	1	1	1	1	1	1	1	1	1	1	1 MP	1	5	2	0
6238	6	1	4	2	1	3	0	1	1	1	1	1	1	2	1	1	1 MP	1	5	5	0
6239	5	0	4	1	1	3	0	1	1	1	1	1	1	1	1	1	1 MP	1	3	2	0
6240	6	1	4	1	1	3	1	1	1	2	1	1	1	1	2	1	1 MP	1	4	0	0
6241	6	1	4	1	1	3	0	1	1	1	1	1	1	1	1	1	1 MP	1	5	19	1
6242	5	0	4	1	1	4	0	1	1	1	1	1	1	1	1	1	1 MP	1	3	8	1
6244	6	0	3	1	1	3	1	1	1	1	1	1	1	1	2	1	1 MP	1	5	0	0
6246	6	0	3	2	0	3	1	1	1	1	1	1	1	1	1	1	1 MP	1	3	0	0
6247	6	1	4	2	1	3	0	1	1	1	1	1	1	1	1	1	1 MP	2		0	0
6249	5	0	4	1	0	2	0	1	1	1	1	1	1	1	1	1	1 MP	1	4	0	0
6251	8	0	2	2	1	5	0	1	2	1	1	2	2	2	1	2	1 MP	1	1	3	0
6253	6	0	3	1	1	1	0	1	1	1	1	1	1	1	2	1	1 MP	1	1	1	0
6254	8	1	3	1	1	3	1	1	1	1	1	1	1	2	1	1	1 MP	1	4	0	0
6255	5	0	4	1	0	3	0	2	1	1	1	1	2	1	1	1	1 MP	1	3	6	0
6256	11	0	1	2	1	4	1	1	1	1	1	1	1	1	2	1	1 MP	1	5	9	1
6258	11	0	1	3	1	3	0	1	1	1	1	1	2	1	1	1	1 MP	1	2	8	1
6259	8	0	2	1	1	2	0	1	2	1	1	1	1	1	1	1	1 MP	1	3	0	0
6263	12	1	2	1	1	4	0	1	1	1	1	1	1	2	1	1	1 MP	1	2	1	0
6264	6	0	3	1	0	3	0	1	1	1	1	1	1	1	1	1	1 MP	2		0	0
6268	8	0	2	1	0	3	1	1	1	1	1	1	1	1	1	1	1 MP	1	4	0	0
6269	8	0	2	1	1	3	1	1	1	1	1	1	1	1	1	1	1 MP	1	5	0	0
6271	6	0	3	1	0	2	1	1	1	1	1	1	1	1	1	1	1 MP	1	4	0	0
6274	22	1	1	1	0	3	1	1	1	1	1	1	1	1	1	1	1 MP	1	3	0	0
6275	11	0	1	2	1	4	0	1	1	1	1	1	1	1	1	1	1 MP	1	5	0	0
6277	8	0	2	3	1	2	0	1	1	1	1	1	1	1	1	1	1 MP	1	5	6	0
6278	8	0	2	1	1	3	0	1	1	1	1	1	1	1	1	1	1 MP	1	5	0	0
6281	5	0	4	1	1	1	1	1	1	1	1	1	1	1	1	1	1 MP	1	5	3	0
6282	6	1	4	1	1	2	0	1	1	1	1	1	1	1	1	1	1 MP	1	4	0	0
6283	8	0	2	1	1	3	0	1	1	1	1	1	1	2	1	1	1 MP	2		0	0
6284	8	0	2	2	1	3	0	1	1	1	1	1	1	1	1	1	1 MP	1	3	1	0
6286	11	0	1	1	0	3	0	1	1	1	1	1	1	1	1	1	1 MP	1	3	3	0
6289	11	0	1	1	0	4	0	1	1	1	1	1	1	2	1	1	1 MP	1	3	0	0
6291	8	0	2	1	1	3	0	1	1	1	1	1	1	1	2	1	1 MP	1	2	0	0
6292	11	0	1	1	1	3	1	1	1	1	1	1	2	2	1	1	1 MP	1	5	0	0
6294	6	0	3	1	1	4	1	1	1	1	1	1	1	1	1	1	1 MP	1	2	1	0
6295	8	1	3	2	1	3	1	1	1	1	1	1	1	1	2	1	1 MP	1	3	1	0
6297	8	1	3	1	1	4	1	1	1	1	1	1	1	1	1	1	1 MP	1	4	2	0
6298	8	1	3	1	1	4	0	1	1	1	1	1	2	1	1	1	1 MP	1	5	1	0
6299	6	0	3	1	0	4	0	1	1	1	1	1	1	1	1	2	1 MP	2		9	1
6302	6	1	4	1	1	2	0	1	1	1	1	1	1	1	1	1	1 MP	1	3	6	0
6305	22	1	1	2	1	4	0	1	1	1	1	1	1	1	1	1	1 MP	2		5	0
6306	11	0	1	1	1	3	0	1	1	1	1	1	1	1	1	1	1 MP	1	3	2	0
6313	6	1	4	1	0	3	0	1	1	1	1	1	1	2	1	1	1 MP	1	3	1	0
6315	8	1	3	3	1	4	1	1	1	1	1	1	1	2	2	1	1 MP	1	5	1	0
6317	8	0	2	1	1	3	0	1	1	1	1	1	1	1	1	1	1 MP	1	1	7	0
6318	12	1	2	2	0	3	1	1	1	1	1	1	1	1	1	1	1 MP	1	4	2	0
6320	8	1	3	1	0	3	1	1	1	1	1	1	1	1	1	1	1 MP	1	5	1	0
6321	5	0	4	1	1	3	0	1	1	1	1	1	1	1	1	1	1 MP	1	3	8	1
6322	11	0	1	1	1	4	1	1	1	1	1	1	1	1	1	1	1 MP	1	3	0	0
6323	8	0	2	1	0	3	1	1	1	1	1	1	1	2	1	1	1 MP	1	2	5	0
6324	6	0	3	2	0	3	0	1	1	1	1	1	1	2	1	1	1 MP	1	3	0	0
6325	5	0	4	1	0	2	1	2	1	1	2	1	2	2	2	1	1 MP	1	2	14	1
6330	8	0	2	1	1	3	1	1	1	1	1	1	1	2	2	1	1 MP	1	3	7	0
6331	12	1	2	1	1	3	1	1	1	1	1	1	1	1	2	2	1 MP	1	3	1	0
6332	6	0	3	1	1	4	0	1	1	1	1	1	1	1	1	1	1 MP	1	3	0	0
6337	8	1	3	1	0	3	1	1	1	1	1	1	1	1	1	1	1 MP	1	3	8	1
6341	8	0	2	1	1	1	0	1	1	1	1	1	1	1	1	1	1 MP	1	4	1	0
6343	8	1	3	1	1	3	1	1	1	1	1	1	1	1	1	1	1 MP	1	2	0	0
6345	6	1	4	1	1	3	0	1	1	1	1	1	2	1	1	1	1 MP	1	3	0	0
6347	22	1	1	2	1	3	1	1	1	2	1	1	1	2	1	1	1 MP	1	5	1	0
6350	8	0	2	1	1	3	0	1	2	1	1	1	1	1	1	1	1 MP	1	4	0	0
6351	6	0	3	1	1	3	1	1	1	1	1	1	1	1	1	1	1 MP	1	5	1	0
6352	5	0	4	1	1	3	0	1	1	1	1	1	1	1	1	1	1 MP	1	3	3	0
6354	5	0	4	1	1	3	0	1	1	1	1	1	1	1	1	1	1 MP	1	3	3	0
6356	6	1	4	1	1	3	0	1	1	1	1	1	2	1	1	1	1 MP	1	5	0	0
6357	5	0	4	1	0	4	0	1	1	1	1	1	1	1	1	1	1 MP	1	2	2	0
6358	11	0	1	2	1	3	1	1	2	1	1	1	1	1	1	1	1 MP	1	3	1	0
6360	6	0	3	1	0	4	0	1	1	1	1	1	1	2	1	1	1 MP	1	2	0	0
6361	8	0	2	2	1	2	1	1	1	1	1	1	1	2	1	1	1 MP	1	2	4	0
6362	6	1	4	1	0	4	0	1	1	1	2	1	1	1	1	1	1 MP	1	3	0	0
6367	8	0	2	1	0	4	0	1	1	1	1	1	1	1	1	1	1 MP	1	4	2	0
6368	12	1	2	2	1	3	0	1	1	1	1	1	1	1	1	1	1 MP	1	3	1	0
6372	11	0	1	2	0	4	0	1	1	1	1	1	1	1	1	1	1 MP	1	3	0	0
6374	8	1	3	1	1	4	1	1	1	1	1	1	1	1	2	1	1 MP	1	4	0	0
6375	8	0	2	1	1	3	1	1	1	1	1	1	1	1	1	1	1 MP	1	3	0	0
6376	8	0	2	2	1	3	0	1	1	1	1	1	1	1	2	1	1 MP	1	3	1	0
6377	12	1	2	1	1	4	0	1	1	1	1	1	1	1	1	1	1 MP	1	5	0	0
6381	6	1	4	1	1	3	0	1	1	1	1	1	1	2	1	1	1 MP	2		2	0
6382	11	0	1	1	1	4	0	1	1	2	1	1	1	1	1	1	1 MP	1	5	0	0
6383	22	1	1	1	0	3	1	1	1	1	1	1	1	1	1	1	1 MP	1	3	0	0
6385	6	0	3	1	0	3	1	1	1	1	1	1	1	1	1	1	1 MP	1	3	0	0
6386	8	0	2	1	1	3	0	1	1	1	1	1	1	1	1	1	1 MP	1	4	0	0
6391	6	1	4	1	1	3	0	1	1	1	1	1	1	1	1	1	1 MP	1	1	0	0
6392	6	0	3	1	1	3	1	1	2	1	1	1	1	1	1	1	1 MP	1	5	0	0
6393	5	0	4	1	0	3	0	1	1	1	1	1	1	1	1	1	1 MP	1	1	3	0
6394	6	0	3	1	0	4	0	1	2	1	1	1	2	2	2	1	1 MP	2		1	0
6395	8	0	2	1	0	5	0	1	2	1	1	1	1	2	1	1	1 MP	1	2	5	0
6396	22	1	1	2	1	3	0	2	2	1	1	1	1	1	1	1	1 MP	2		0	0
6397	8	0	2	1	1	3	0	1	2	1	1	1	1	1	1	1	1 MP	1	5	0	0
6398	11	0	1	2	1	4	0	1	1	1	1	1	1	2	1	1	1 MP	1	5	0	0
6399	8	0	2	1	0	3	1	1	1	1	1	1	1	1	1	1	1 MP	1	5	3	0
6400	5	0	4	1	0	3	0	1	1	1	1	1	2	1	2	1	1 MP	1	5	0	0
6401	8	1	3	1	1	3	1	1	1	1	1	1	1	1	1	1	1 MP	1	5	0	0
6402	11	0	1	1	0	4	1	1	1	1	1	1	1	1	1	1	1 MP	1	5	10	1
6403	8	0	2	1	0	4	1	1	1	1	1	1	2	1	1	1	1 MP	1	3	0	0
6406	8	0	2	1	1	3	1	1	1	1	1	1	1	2	1	1	1 MP	2		0	0
6407	11	0	1	1	1	3	0	2	1	1	1	1	1	1	1	1	1 MP	1	5	0	0
6408	5	0	4	2	0	2	0	1	1	2	1	1	1	1	1	1	1 MP	1	2	0	0
6410	8	0	2	1	0	3	1	1	1	1	1	1	1	1	1	1	1 MP	1	2	0	0
6412	8	0	2	1	0	2	1	1	1	1	1	1	1	1	1	1	1 MP	1	4	2	0
6413	22	1	1	2	0	3	1	1	1	1	1	1	1	1	1	1	1 MP	1	4	0	0
6414	12	1	2	1	1	3	1	1	1	1	1	1	1	1	1	1	1 MP	1	3	2	0
6415	12	1	2	1	1	3	0	1	1	1	1	1	1	1	1	1	1 MP	1	4	8	1
6417	8	0	2	2	1	3	1	1	1	1	1	1	1	1	1	1	1 MP	1	4	0	0
6419	12	1	2	1	1	3	1	1	2	1	2	1	1	1	1	1	1 MP	1	4	0	0
6420	8	0	2	2	0	3	1	1	1	1	1	1	1	2	1	1	1 MP	1	3	1	0
6421	5	0	4	1	0	3	1	1	1	1	1	1	1	1	1	1	1 MP	1	1	1	0
6426	8	0	2	3	1	2	0	1	1	1	1	1	1	1	1	1	1 MP	1	3	0	0
6428	6	1	4	1	0	3	0	1	2	1	1	1	1	1	1	1	1 MP	1	4	0	0
6429	6	1	4	1	1	3	0	1	1	1	1	1	1	1	1	1	1 MP	1	4	3	0
6432	8	0	2	1	0	2	0	1	1	1	1	1	1	1	1	1	1 MP	1	5	8	1
6434	8	0	2	1	0	4	1	1	1	1	1	1	1	1	1	1	1 MP	1	3	0	0
6435	6	0	2	1	0	3	0	1	1	1	1	1	2	2	1	1	1 MP	1	2	1	0
6436	8	0	2	2	1	3	0	1	1	2	1	1	2	1	1	1	1 MP	1	3	3	0
6437	8	0	2	1	1	3	0	1	1	1	1	1	1	1	1	1	1 MP	1	3	1	0
6439	8	0	2	1	1	3	0	1	1	1	1	1	1	1	1	1	1 MP	1	3	0	0
6440	11	0	1	3	0	3	0	1	1	1	1	1	1	1	1	1	1 MP	1	4	0	0
6441	11	0	1	2	1	3	0	1	1	1	1	1	1	1	1	1	1 MP	1	3	2	0
6443	22	1	1	2	1	3	0	1	1	1	1	1	1	1	1	1	1 MP	1	4	0	0
6444	5	0	4	1	0	3	0	1	1	1	1	1	1	1	1	1	1 MP	1	4	0	0
6446	8	0	2	1	0	3	1	1	1	1	1	1	1	1	2	1	1 MP	1	5	2	0
6447	8	0	2	1	1	2	1	1	1	1	1	1	1	1	1	1	1 MP	1	3	0	0
6449	22	1	1	1	1	4	0	1	1	1	1	1	1	1	1	1	1 MP	1	4	0	0
6451	6	1	4	1	0	3	0	1	1	1	1	1	1	1	1	1	1 MP	1	3	1	0
6453	11	0	1	2	1	3	0	1	1	1	1	1	1	1	1	1	1 MP	1	4	3	0
6455	8	0	2	3	1	3	0	1	1	1	1	1	1	1	1	1	1 MP	1	5	0	0
6457	22	1	1	2	1	3	0	1	1	1	1	1	1	2	1	1	1 MP	1	4	2	0
6458	8	0	2	3	0	3	0	1	1	1	1	1	1	1	1	1	1 MP	1	3	0	0
6459	8	0	2	2	1	4	0	1	1	1	1	1	1	1	1	1	1 MP	1	3	0	0
6461	12	1	2	3	0	4	0	1	1	1	1	1	1	1	2	1	1 MP	1	1	0	0
6468	12	1	2	1	1	5	0	1	1	1	1	1	1	1	1	1	1 MP	1	4	1	0
6472	5	0	4	1	0	3	0	1	1	1	1	1	1	1	1	1	1 MP	1	3	5	0
6473	5	0	4	1	0	3	1	1	1	1	1	1	1	1	1	1	1 MP	1	3	1	0
6477	11	0	1	2	1	3	0	1	1	1	1	1	1	1	1	1	1 MP	1	3	12	1
6483	8	0	2	3	1	3	0	1	1	1	1	1	1	1	1	1	1 MP	1	2	0	0
6484	8	0	2	1	0	3	0	1	1	1	1	1	1	1	2	1	1 MP	1	2	6	0
6485	5	0	4	1	1	3	0	1	1	1	1	1	1	2	1	1	1 MP	2		0	0
6490	8	0	2	2	0	3	1	1	1	1	1	1	1	1	1	1	1 MP	1	3	1	0
6491	5	0	4	1	1	3	1	1	1	1	1	1	1	1	1	1	1 MP	1	3	6	0
6494	8	0	2	1	1	3	1	1	1	1	1	1	1	2	1	1	1 MP	1	1	6	0
6497	5	0	4	1	1	3	0	1	1	1	1	1	1	1	1	1	1 MP	1	2	3	0
6499	8	0	2	2	0	3	0	1	1	1	1	1	1	1	1	1	1 MP	1	5	10	1
6501	8	0	2	2	0	3	0	1	1	1	1	1	1	1	1	1	1 MP	1	3	4	0
6502	8	0	2	3	1	3	1	1	2	1	1	1	1	1	1	1	1 MP	1	2	2	0
6506	12	1	2	2	1	4	1	1	2	1	1	1	1	1	2	1	1 MP	1	1	12	1
6514	11	0	1	3	0	4	0	1	1	1	1	1	1	1	1	1	1 MP	1	5	1	0
6515	8	0	2	2	1	3	0	1	1	1	1	1	1	1	1	1	1 MP	1	2	10	1
6517	8	0	2	3	1	3	0	1	1	1	1	1	1	1	1	1	1 MP	1	1	22	1
6518	6	1	4	2	1	3	0	1	2	1	1	1	1	1	1	1	1 MP	1	1	4	0
6534	22	1	1	1	0	3	1	1	1	2	1	1	1	1	1	1	1 MP	1	5	22	1
6536	5	0	4	2	0	3	0	1	2	1	1	1	1	1	1	1	1 MP	1	3	23	1
6542	8	0	2	1	1	3	0	1	1	1	1	1	1	1	1	1	1 MP	1	3	3	0
6547	11	0	1	2	1	3	0	1	1	1	1	1	1	1	1	1	1 MP	1	3	8	1
6549	6	0	3	1	0	3	1	1	1	1	1	1	1	1	1	1	1 MP	1	2	6	0
6552	11	0	1	3	1	3	0	1	1	1	1	1	1	1	1	1	1 MP	1	2	0	0
6555	6	0	3	1	0	3	1	1	1	1	1	1	1	1	1	1	1 MP	2		0	0
6560	8	0	2	3	1	3	1	1	1	1	1	1	1	1	1	1	1 MP	1	3	15	1
6571	5	0	4	1	0	3	0	1	1	1	1	1	1	1	2	1	1 MP	1	2	0	0
6575	5	0	4	2	1	3	0	1	1	1	1	1	1	1	1	1	1 MP	1	3	4	0
6576	6	1	4	2	1	3	1	1	1	1	1	1	1	1	2	1	1 MP	1	2	0	0
6579	11	0	1	1	1	3	1	1	1	1	1	1	1	1	1	1	1 MP	1	5	4	0
6581	8	1	3	2	1	5	0	1	1	2	1	1	1	2	1	1	1 MP	1	3	1	0
6582	11	0	1	2	1	3	0	1	1	1	1	1	1	1	1	1	1 MP	1	2	10	1
6586	22	1	1	1	1	3	1	1	1	1	1	1	1	1	1	1	1 MP	1	3	7	0
6588	6	0	3	1	0	4	0	1	1	1	1	1	1	1	1	1	1 MP	1	5	1	0
6589	5	0	4	1	0	3	0	1	1	1	1	1	1	1	1	1	1 MP	1	3	6	0
6591	11	0	1	1	1	4	0	1	1	1	1	1	1	1	1	1	1 MP	1	1	2	0
6592	11	0	1	3	1	3	0	1	1	1	1	1	1	1	1	1	1 MP	1	3	2	0
6593	11	0	1	1	0	4	0	1	1	1	1	2	2	1	2	1	1 MP	1	2	2	0
6594	8	0	2	1	1	3	0	1	1	1	1	1	1	1	1	1	1 MP	1	3	1	0
6595	8	0	2	2	1	4	0	1	1	1	1	1	1	1	1	1	1 MP	1	3	0	0
6597	6	1	4	1	1	3	1	1	1	1	1	1	1	1	2	1	1 MP	1	2	0	0
6599	5	0	4	1	1	3	0	1	1	1	1	1	1	1	1	1	1 MP	1	1	3	0
6603	5	0	4	1	1	3	0	1	1	1	1	1	1	1	1	1	1 MP	1	2	3	0
6604	6	1	4	1	1	3	1	1	1	1	1	1	1	1	1	1	1 MP	1	5	5	0
6605	11	0	1	2	1	3	0	1	1	1	1	1	1	1	1	1	1 MP	1	3	1	0
6606	6	1	4	1	0	3	0	1	1	1	1	1	1	1	1	1	1 MP	1	3	6	0
6608	11	0	1	2	1	3	0	2	1	1	1	1	1	1	2	1	1 MP	1	2	0	0
6609	11	0	1	2	1	4	1	1	1	1	1	1	1	1	1	1	1 MP	1	4	4	0
6619	6	1	4	1	1	3	0	1	1	1	1	1	2	1	1	1	1 MP	1	3	13	1
6621	6	1	4	1	1	3	1	2	1	1	1	1	1	1	1	1	1 MP	1	5	0	0
6622	8	0	2	2	1	3	1	1	1	1	1	1	1	1	1	1	1 MP	1	3	1	0
6623	8	0	2	2	1	4	0	1	1	1	1	1	1	1	1	1	1 MP	1	3	0	0
6627	6	1	4	1	0	1	1	1	1	1	1	1	1	1	1	1	1 MP	1	3	0	0
6628	6	1	4	1	0	3	1	1	1	1	1	1	1	1	1	1	1 MP	1	1	3	0
6634	6	1	4	2	1	3	0	1	1	1	1	1	1	1	1	1	1 MP	1	4	4	0
6635	5	0	4	1	1	3	1	1	1	1	1	1	1	1	1	1	1 MP	1	3	0	0
6642	11	0	1	3	1	3	1	1	1	1	1	1	1	1	1	1	1 MP	1	2	2	0
6645	11	0	1	2	0	3	1	1	1	1	1	1	1	2	1	1	1 MP	1	4	2	0
6647	8	0	2	1	1	3	1	1	1	2	1	1	1	1	1	1	1 MP	1	3	0	0
6651	8	0	2	2	0	2	1	1	1	1	1	1	1	1	2	1	1 MP	1	5	10	1
6652	12	1	2	2	1	3	1	1	1	2	1	1	1	1	2	1	1 MP	1	5	2	0
6654	11	0	1	3	1	3	0	1	1	1	1	1	1	1	1	1	1 MP	1	3	0	0
6655	5	0	4	3	1	1	0	1	1	1	1	1	1	1	1	1	1 MP	1	3	0	0
6656	6	1	4	2	1	3	0	1	1	1	1	1	1	1	1	1	1 MP	1	3	0	0
6659	12	1	2	2	1	3	0	1	1	1	1	1	1	1	2	1	1 MP	1	3	0	0
6660	12	1	2	2	1	2	0	1	1	1	1	1	1	1	1	1	1 MP	1	3	7	0
6665	5	0	4	2	0	4	1	1	1	1	1	1	1	1	1	1	1 MP	1	3	0	0
6666	11	0	1	1	0	3	1	1	1	1	1	1	1	1	1	1	1 MP	2		19	1
6667	22	1	1	3	1	3	0	2	1	1	1	1	2	1	1	1	1 MP	1	4	10	1
6669	5	0	4	1	0	5	0	1	1	1	1	1	1	1	1	1	1 MP	1	3	8	1
6670	11	0	1	1	1	1	0	1	1	1	1	1	1	1	1	1	1 MP	1	4	11	1
6671	8	0	2	3	0	2	1	1	2	1	1	1	1	1	1	1	1 MP	1	3	1	0
6672	5	0	4	1	1	2	0	1	1	2	1	1	1	1	2	1	1 MP	1	3	4	0
6673	6	1	4	1	1	1	0	1	1	1	1	1	1	1	1	1	1 MP	1	3	21	1
6674	5	0	4	1	0	3	0	1	2	1	1	2	1	1	1	1	1 MP	1	3	6	0
6675	5	0	4	2	0	3	0	1	1	1	1	1	1	1	1	1	1 MP	1	4	0	0
6677	8	0	2	1	0	3	0	1	1	1	1	1	1	1	2	1	1 MP	1	3	2	0
6678	6	0	3	2	0	2	0	1	2	1	1	1	2	1	1	1	1 MP	1	5	9	1
6680	6	1	4	1	1	4	0	1	2	1	1	1	1	1	1	1	1 MP	1	3	0	0
6681	22	1	1	3	1	3	0	1	1	1	1	1	1	1	1	1	1 MP	1	5	1	0
6686	5	0	4	1	0	4	1	1	1	1	1	1	1	2	2	1	1 MP	1	4	6	0
6689	11	0	1	1	1	2	1	1	2	1	1	1	1	1	1	1	1 MP	1	2	0	0
6691	8	0	2	3	0	3	0	1	1	1	1	1	1	1	1	1	1 MP	1	3	1	0
6692	12	1	2	3	1	3	0	1	1	1	1	1	1	1	1	1	1 MP	2		2	0
6693	6	0	3	1	0	3	0	1	1	1	1	1	1	1	1	1	1 MP	1	3	5	0
6696	22	1	1	2	1	3	0	1	1	1	1	1	1	1	1	1	1 MP	1	3	0	0
6697	8	0	2	2	0	2	0	1	1	1	1	1	1	1	1	1	1 MP	1	2	7	0
6701	6	1	4	1	1	4	0	1	1	1	1	1	1	1	1	1	1 MP	1	5	0	0
6705	12	1	2	2	1	3	0	1	1	1	1	1	1	1	1	1	1 MP	1	1	15	1
6713	6	1	4	1	1	4	0	1	1	1	1	1	1	2	2	1	1 MP	1	4	0	0
6714	6	1	4	1	1	3	0	1	1	1	1	1	1	1	1	1	1 MP	1	5	13	1
6718	5	0	4	2	1	3	0	1	1	2	1	1	1	1	1	1	1 MP	1	2	0	0
6719	5	0	4	3	1	3	1	1	1	2	1	1	1	1	1	1	1 MP	1	3	19	1
6720	6	1	4	2	1	3	1	1	1	1	1	1	1	2	1	1	1 MP	1	5	0	0
6722	5	0	3	1	0	4	1	1	1	1	1	1	1	2	1	1	1 MP	1	2	0	0
6723	6	1	4	2	0	3	0	1	1	1	1	1	1	1	1	1	1 MP	1	5	3	0
6726	5	0	4	1	1	3	0	1	1	1	1	1	1	1	1	1	1 MP	1	5	9	1
6730	6	1	4	3	1	3	0	1	1	1	1	1	1	1	1	1	1 MP	1	2	0	0
6731	5	0	4	2	1	3	0	1	1	1	1	1	1	1	2	1	1 MP	1	1	0	0
6732	22	1	1	1	1	4	0	1	1	2	1	1	1	1	1	1	1 MP	1	4	0	0
6736	22	1	1	2	1	3	1	1	1	1	1	1	1	1	1	1	1 MP	1	5	0	0
6738	6	0	3	1	1	3	0	1	1	1	1	1	1	1	1	1	1 MP	1	5	0	0
6739	8	0	2	1	1	3	0	1	1	1	1	1	1	1	1	1	1 MP	1	2	2	0
6740	5	0	4	3	0	4	0	1	1	1	1	1	2	2	1	1	1 MP	1	5	0	0
6749	12	1	2	1	1	3	0	1	1	1	1	1	1	1	1	1	1 MP	1	2	2	0
6752	11	0	1	2	1	4	0	1	1	1	1	1	1	1	1	1	1 MP	2		0	0
6753	11	0	1	2	0	3	0	1	1	1	1	1	1	1	1	1	1 MP	1	4	4	0
6754	22	1	1	2	1	3	0	1	1	1	1	1	1	1	1	1	1 MP	1	3	7	0
6756	8	0	2	2	1	3	0	1	1	1	1	1	1	1	1	1	1 MP	2		1	0
6759	11	0	1	1	1	4	0	1	1	1	1	1	1	2	2	1	1 MP	1	4	0	0
6761	8	0	2	1	1	3	1	2	2	1	1	1	1	1	1	1	1 MP	1	3	7	0
6762	8	0	2	1	1	3	1	1	1	1	1	1	1	1	1	1	1 MP	1	3	1	0
6767	11	0	1	2	1	3	1	1	1	1	1	1	2	1	1	1	1 MP	1	3	0	0
6768	11	0	1	1	1	4	1	1	1	1	1	1	1	1	2	1	1 MP	1	3	1	0
6770	11	0	1	1	1	3	0	1	1	1	1	1	1	1	1	1	1 MP	1	5	0	0
6771	11	0	1	1	1	3	0	1	1	1	1	1	1	1	1	1	1 MP	2		0	0
6772	22	1	1	1	1	3	1	1	1	1	1	1	1	1	1	1	1 MP	1	5	0	0
6775	8	0	2	1	1	3	1	1	1	2	1	1	1	1	2	1	1 MP	1	2	0	0
6776	8	0	2	2	1	3	1	1	1	1	1	1	1	1	2	1	1 MP	1	2	1	0
6779	8	1	3	1	1	3	0	1	1	1	1	1	1	1	1	1	1 MP	1	3	5	0
6783	22	1	1	1	1	2	0	1	1	1	1	1	1	1	1	1	1 MP	1	2	11	1
6784	8	0	2	1	1	3	0	1	1	1	1	1	1	1	1	1	1 MP	1	2	1	0
6789	12	1	2	1	0	2	1	1	1	1	1	1	1	1	2	1	1 MP	1	4	1	0
6790	8	0	2	1	1	3	1	1	1	1	1	1	1	1	2	1	1 MP	1	2	0	0
6792	11	0	1	1	0	3	0	1	2	1	1	1	1	1	1	1	1 MP	1	5	4	0
6793	8	0	2	1	1	3	1	1	1	1	1	1	2	1	2	1	1 MP	1	2	0	0
6795	5	0	4	1	0	3	0	1	1	2	1	1	1	1	1	1	1 MP	1	3	1	0
6797	5	0	4	1	0	2	0	1	1	1	2	1	1	1	2	1	1 MP	1	5	8	1
6798	11	0	1	1	0	2	0	1	2	2	1	1	1	1	1	1	1 MP	1	3	4	0
6799	22	1	1	2	1	3	0	1	1	2	1	1	1	1	1	1	1 MP	1	5	0	0
6800	8	0	2	1	1	3	1	1	1	1	1	1	2	1	1	1	1 MP	1	5	0	0
6801	8	0	2	1	0	3	1	1	1	1	1	1	1	1	2	1	1 MP	1	5	9	1
6803	5	0	4	1	0	3	1	1	1	1	1	2	2	2	2	1	1 MP	1	3	3	0
6804	6	1	4	1	0	3	0	1	2	1	1	1	1	1	1	1	1 MP	1	5	0	0
6807	8	0	2	2	1	4	0	1	1	1	1	1	1	2	1	1	1 MP	1	2	4	0
6810	8	0	2	1	1	3	0	1	1	1	1	1	1	1	1	1	1 MP	1	5	0	0
6812	22	1	1	1	1	3	0	1	1	1	1	1	1	1	1	1	1 MP	1	3	0	0
6813	11	0	1	1	1	2	1	1	1	1	1	1	1	1	1	1	1 MP	1	3	0	0
6814	6	0	3	1	1	3	1	1	1	1	1	1	1	1	1	1	1 MP	1	2	0	0
6816	11	0	1	1	0	4	1	1	1	1	1	1	1	1	2	1	1 MP	1	5	0	0
6819	22	1	1	2	0	3	0	1	1	1	1	1	1	1	1	1	1 MP	1	3	1	0
6823	6	1	4	1	0	3	1	1	1	1	1	1	1	1	1	1	1 MP	1	3	0	0
6825	5	0	4	1	0	4	1	2	2	1	1	1	1	1	1	1	1 MP	1	5	1	0
6828	11	0	1	2	0	3	1	1	1	1	1	1	1	1	1	1	1 MP	1	3	7	0
6829	12	1	2	2	1	3	1	1	1	1	1	1	1	1	1	1	1 MP	1	3	0	0
6831	11	0	1	1	0	3	1	1	1	1	1	1	1	1	1	1	1 MP	1	5	1	0
6832	8	0	2	1	1	3	1	1	1	2	1	1	1	1	1	2	1 MP	1	3	2	0
6835	11	0	1	1	1	3	0	1	1	1	1	1	1	1	1	1	1 MP	1	5	0	0
6837	22	1	1	1	1	4	1	1	1	1	1	1	1	1	1	1	1 MP	2		3	0
6838	22	1	1	1	1	3	1	1	1	1	1	1	1	1	1	1	1 MP	1	2	0	0
6840	22	1	1	1	1	4	0	1	1	1	1	1	1	2	2	1	1 MP	1	3	2	0
6841	22	1	1	1	1	3	1	1	1	1	1	1	1	1	2	1	1 MP	1	5	1	0
6842	11	0	1	1	1	4	0	1	1	1	1	1	2	1	1	1	1 MP	1	5	0	0
6848	12	1	2	2	0	3	0	1	1	1	1	1	1	1	1	1	1 MP	1	5	0	0
6854	5	0	4	1	0	3	1	1	1	1	1	1	1	1	1	1	1 MP	1	3	22	1
6859	8	0	2	1	0	3	1	1	1	1	1	1	1	1	1	1	1 MP	1	3	0	0
6861	5	0	4	2	0	3	0	1	1	1	1	1	1	1	1	1	1 MP	1	2	0	0
6862	5	0	4	1	1	4	0	1	1	1	1	1	1	1	1	1	1 MP	1	2	0	0
6867	12	1	2	1	1	3	0	1	1	1	1	1	1	1	2	1	1 MP	1	3	0	0
6868	12	1	2	1	1	3	1	1	1	1	1	1	1	1	1	1	1 MP	1	3	0	0
6869	5	0	4	3	0	3	1	1	1	1	1	1	1	1	1	1	1 MP	1	3	0	0
6876	6	1	4	1	1	3	1	1	1	1	1	1	2	1	1	1	1 MP	1	3	0	0
6877	11	0	1	2	1	3	1	1	1	1	1	1	1	1	1	1	1 MP	1	3	0	0
6881	6	1	4	3	1	4	1	2	2	1	1	1	1	1	1	1	1 MP	1	3	0	0
6882	5	0	4	1	1	3	0	1	1	1	1	1	1	1	1	1	1 MP	1	5	3	0
6892	5	0	4	1	1	3	0	1	1	1	1	1	1	1	2	1	1 MP	1	3	8	1
6893	22	1	1	2	1	2	1	1	1	1	1	1	1	1	1	1	1 MP	1	2	0	0
6901	11	0	1	2	1	3	1	1	1	1	1	1	1	1	1	1	1 MP	1	2	0	0
6902	22	1	1	1	1	3	1	1	1	1	1	1	1	1	1	1	1 MP	1	3	1	0
6903	12	1	2	1	1	2	1	1	1	1	2	1	1	1	1	1	1 MP	1	4	3	0
6904	8	0	2	3	0	4	1	1	1	1	1	1	1	2	1	1	1 MP	1	3	0	0
6905	8	0	2	1	0	3	1	1	1	1	1	1	1	1	1	1	1 MP	1	5	4	0
6906	8	0	2	1	1	3	1	1	1	1	1	1	1	2	1	1	1 MP	2		0	0
6907	12	1	2	2	1	4	0	2	1	1	1	2	1	2	2	1	1 MP	1	5	0	0
6908	12	1	2	1	1	4	0	1	1	1	1	1	1	1	1	1	1 MP	2		1	0
6910	8	0	2	3	0	3	1	1	1	1	1	1	1	1	1	1	1 MP	1	2	0	0
6911	8	0	2	1	1	3	1	1	1	1	1	1	1	1	2	1	1 MP	2		0	0
6912	6	0	3	1	1	3	1	1	1	1	1	1	1	1	1	1	1 MP	1	4	0	0
6916	6	1	4	1	1	3	0	1	1	1	1	1	1	2	2	1	1 MP	1	3	0	0
6917	6	1	4	1	1	3	0	1	1	1	1	1	1	1	1	1	1 MP	1	4	0	0
6919	5	0	4	1	1	3	0	1	1	1	1	1	1	1	1	1	1 MP	1	3	0	0
6921	6	1	4	1	1	3	0	1	1	1	1	1	1	1	1	1	1 MP	1	3	0	0
6922	6	1	4	2	1	3	1	1	1	1	1	1	1	1	1	1	1 MP	1	3	5	0
6923	6	1	4	1	1	3	0	1	1	1	1	1	1	1	1	1	1 MP	1	3	3	0
6924	6	1	4	2	0	3	1	1	1	1	1	1	1	1	1	1	1 MP	1	4	10	1
6925	11	0	1	2	1	3	1	1	1	1	1	1	1	1	2	1	1 MP	1	3	4	0
6926	11	0	1	1	1	3	1	1	1	1	1	1	1	1	1	1	1 MP	1	2	0	0
6927	11	0	1	1	1	3	1	1	1	1	1	1	1	1	1	1	1 MP	1	3	0	0
6928	11	0	1	1	0	4	1	1	1	1	1	1	1	1	2	1	1 MP	1	3	15	1
6929	11	0	1	1	1	3	0	1	1	1	1	1	1	1	1	1	1 MP	1	3	0	0
6930	6	0	3	1	1	4	1	1	1	1	1	1	1	1	1	1	1 MP	1	2	0	0
6932	11	0	1	3	1	3	1	1	2	2	1	1	2	1	1	1	1 MP	1	2	0	0
6933	12	1	2	1	0	1	1	1	1	1	1	1	1	1	2	1	1 MP	1	4	0	0
6936	8	1	3	1	1	3	1	1	1	1	1	1	1	1	1	1	1 MP	1	3	0	0
6938	12	1	2	1	0	4	1	1	1	1	1	1	1	1	1	1	1 MP	2		0	0
6939	6	0	3	1	0	3	0	1	1	1	1	1	1	1	1	1	1 MP	1	3	0	0
6940	6	0	3	1	1	3	0	1	1	1	1	1	1	1	1	1	1 MP	1	3	0	0
6941	6	0	3	1	1	4	0	2	2	1	2	1	2	1	1	1	1 MP	1	2	0	0
6942	6	0	3	1	1	2	0	1	1	1	1	1	1	1	1	1	1 MP	1	2	0	0
6943	8	1	3	1	0	2	1	1	1	1	1	1	1	1	1	1	1 MP	1	3	0	0
6944	8	1	3	1	1	3	0	1	1	1	1	1	1	1	1	1	1 MP	1	3	0	0
6945	8	1	3	1	1	4	1	1	1	1	1	1	1	1	1	1	1 MP	1	3	0	0
6946	11	0	1	1	1	4	1	1	1	1	1	1	1	2	1	1	1 MP	1	2	4	0
6947	11	0	1	2	1	4	0	1	2	1	1	1	2	1	2	1	1 MP	1	3	0	0
6948	11	0	1	1	1	3	0	1	1	1	1	1	1	1	1	1	1 MP	1	3	0	0
6949	11	0	1	1	1	3	0	1	1	1	2	2	1	1	1	1	1 MP	1	3	0	0
6951	22	1	1	1	1	2	0	1	1	1	1	1	1	1	1	1	1 MP	1	3	4	0
6953	22	1	1	1	0	3	1	1	1	1	1	1	1	1	1	1	1 MP	1	5	0	0
6954	8	0	2	1	0	4	1	1	1	1	1	1	1	1	1	1	1 MP	1	4	4	0
6955	8	0	2	1	1	3	1	1	1	1	1	1	1	1	1	1	1 MP	1	3	3	0
6956	8	0	2	2	1	5	0	1	1	1	1	1	1	2	1	1	1 MP	1	3	2	0
6957	12	1	2	3	0	3	0	1	1	1	1	1	1	1	1	1	1 MP	1	3	2	0
6959	12	1	2	1	0	3	0	1	1	1	1	1	1	1	1	1	1 MP	2		6	0
6960	12	1	2	2	1	3	1	1	1	1	1	1	1	2	1	1	1 MP	1	1	0	0
6961	6	0	3	1	1	3	0	1	1	1	1	1	1	1	1	1	1 MP	1	5	1	0
6962	6	0	3	1	1	2	0	1	1	1	1	1	1	1	1	1	1 MP	1	3	0	0
6963	6	0	3	1	1	2	1	1	1	1	1	1	1	1	1	1	1 MP	1	3	0	0
6964	8	1	3	1	0	2	1	1	2	1	1	1	1	1	2	1	1 MP	1	5	0	0
6965	8	1	3	1	1	1	0	1	1	1	1	1	1	1	1	1	1 MP	1	4	2	0
6967	12	1	2	1	1	3	1	1	1	1	1	1	1	1	1	1	1 MP	1	5	1	0
6968	8	1	3	1	1	3	1	1	1	1	1	1	1	1	1	1	1 MP	1	3	0	0
6969	8	1	3	1	1	3	1	1	1	1	1	1	1	1	1	1	1 MP	1	5	0	0
6970	5	0	4	1	1	3	1	1	1	1	1	1	1	1	1	1	1 MP	1	2	2	0
6971	5	0	4	1	1	5	0	1	1	1	1	1	2	2	1	1	1 MP	1	3	5	0
6972	6	1	4	1	1	4	1	1	1	1	1	1	1	2	2	1	1 MP	1	3	1	0
6975	11	0	1	3	1	3	0	1	1	1	1	1	1	1	2	1	1 MP	1	2	0	0
6976	22	1	1	1	1	2	1	1	1	1	1	1	1	1	1	1	1 MP	2		0	0
6977	11	0	1	2	1	3	0	1	1	1	1	1	1	1	2	1	1 MP	1	5	0	0
6978	8	1	3	1	1	3	1	1	1	1	1	1	1	1	1	1	1 MP	1	3	0	0
6979	11	0	1	2	1	3	0	1	1	1	1	1	1	1	1	1	1 MP	1	2	0	0
6980	11	0	1	1	1	3	1	1	1	1	1	1	1	1	2	1	1 MP	1	5	0	0
6981	6	1	4	1	1	2	1	1	1	1	1	1	1	1	1	1	1 MP	1	3	0	0
6982	11	0	1	1	0	3	1	1	1	1	1	1	1	1	1	1	1 MP	1	3	0	0
6983	11	0	1	1	0	3	1	1	1	1	1	1	1	1	1	1	1 MP	1	4	0	0
6984	22	1	1	3	1	3	1	1	1	1	1	1	1	1	1	1	1 MP	2		2	0
6985	22	1	1	3	0	3	0	1	1	1	1	1	1	1	1	1	1 MP	1	3	5	0
6986	12	1	2	1	1	3	1	1	1	1	1	1	1	1	1	1	1 MP	1	3	7	0
6987	12	1	2	2	0	3	1	1	1	1	1	1	1	1	1	1	1 MP	1	3	3	0
6989	8	0	2	1	1	2	0	1	1	1	1	1	1	1	1	1	1 MP	1	3	0	0
6990	8	1	3	1	1	3	1	1	1	1	1	1	2	1	2	1	1 MP	1	3	1	0
6991	6	0	3	2	1	2	0	1	1	1	1	1	1	1	2	1	1 MP	1	3	0	0
6992	6	0	3	1	1	3	1	1	1	1	1	1	1	1	1	1	1 MP	1	2	0	0
6993	6	0	3	1	0	3	1	1	1	1	1	1	1	1	1	1	1 MP	1	3	0	0
6994	6	0	3	1	1	3	0	1	1	1	1	1	1	1	1	1	1 MP	1	3	2	0
6995	6	1	4	1	1	3	1	1	1	1	1	1	1	1	1	1	1 MP	1	3	3	0
6996	6	1	4	1	1	2	0	1	1	1	1	1	1	1	1	1	1 MP	1	4	0	0
6997	6	1	4	1	1	3	0	1	1	1	1	1	1	1	1	1	1 MP	1	2	2	0
6998	8	1	3	1	1	3	0	1	1	1	1	1	1	2	1	1	1 MP	1	3	0	0
6999	5	0	4	1	0	3	0	1	1	1	1	1	1	1	1	1	1 MP	1	3	0	0
7000	11	0	1	2	1	3	0	1	1	1	1	1	1	1	1	1	1 MP	1	2	0	0
7002	22	1	1	1	1	3	1	1	1	1	1	1	1	1	1	1	1 MP	1	4	0	0
7003	8	0	2	1	1	3	1	1	1	1	1	1	1	1	1	1	1 MP	1	3	0	0
7005	8	0	2	1	0	3	1	1	1	1	1	1	1	1	1	1	1 MP	1	3	7	0
7006	12	1	2	1	1	3	0	1	1	1	1	1	1	1	1	1	1 MP	1	3	2	0
7007	12	1	2	1	0	3	1	1	1	1	1	1	1	1	1	1	1 MP	1	3	1	0
7008	6	0	3	1	1	3	1	1	1	1	1	1	1	1	1	1	1 MP	1	3	0	0
7009	6	0	3	1	1	3	1	1	1	1	1	1	1	1	1	1	1 MP	1	3	0	0
7010	6	0	3	1	1	3	0	1	1	1	1	1	1	1	1	2	1 MP	1	3	6	0
7011	6	0	3	1	0	3	0	1	1	1	1	1	1	1	1	1	1 MP	1	4	13	1
7012	6	0	3	1	0	3	0	1	1	1	1	1	1	1	1	1	1 MP	1	4	7	0
7013	8	1	3	1	1	3	0	1	1	1	1	1	1	1	1	1	1 MP	1	4	0	0
7014	8	1	3	1	1	3	1	1	1	1	1	1	1	1	1	1	1 MP	1	4	1	0
7015	8	1	3	1	1	3	0	1	1	1	1	1	1	1	1	1	1 MP	1	3	11	1
7016	8	1	3	1	1	3	0	1	1	1	1	1	1	1	1	1	1 MP	1	3	4	0
7017	8	1	3	2	0	3	0	1	1	1	1	1	1	1	1	1	1 MP	1	4	9	1
7018	8	1	3	1	0	3	0	1	1	1	1	1	1	1	1	1	1 MP	2		0	0
7019	5	0	4	1	0	3	0	1	1	1	1	1	1	1	1	1	1 MP	1	3	0	0
7020	5	0	4	2	0	3	1	1	1	1	1	1	1	1	1	1	1 MP	1	2	10	1
7021	6	1	4	1	0	3	1	1	1	1	1	1	2	1	2	1	1 MP	2		0	0
7022	6	1	4	1	0	3	1	1	1	1	1	1	1	1	1	1	1 MP	1	3	0	0
7024	8	1	3	3	1	2	0	1	1	1	1	1	1	1	1	1	1 MP	1	4	3	0
7025	11	0	1	1	0	3	1	1	1	1	1	1	1	1	1	1	1 MP	2		0	0
7027	11	0	1	2	0	3	1	2	1	1	1	1	1	1	1	1	1 MP	2		0	0
7028	11	0	1	1	1	3	1	1	1	1	1	1	1	1	1	1	1 MP	1	2	0	0
7030	11	0	1	1	1	3	0	1	1	1	1	1	1	1	1	1	1 MP	2		1	0
7031	22	1	1	3	1	3	0	1	1	1	1	1	1	1	1	1	1 MP	1	3	0	0
7034	22	1	1	1	1	3	0	1	1	1	1	1	1	1	1	1	1 MP	1	4	0	0
7038	22	1	1	1	1	3	0	1	1	1	1	1	1	1	1	1	1 MP	1	5	1	0
7039	22	1	1	2	0	3	0	1	1	1	1	1	1	1	1	1	1 MP	1	3	0	0
7041	22	1	1	1	1	3	1	1	1	1	1	1	1	1	1	1	1 MP	1	3	1	0
7042	22	1	1	2	1	3	0	1	1	1	1	1	1	1	1	1	1 MP	2		0	0
7043	12	1	2	2	1	5	1	1	2	1	1	1	1	1	2	1	1 MP	1	5	0	0
7045	12	1	2	1	0	3	1	1	1	1	1	1	1	1	1	1	1 MP	2		1	0
7046	12	1	2	1	1	3	0	1	1	1	1	1	1	1	1	1	1 MP	1	2	0	0
7048	12	1	2	1	1	2	1	2	1	1	1	1	1	1	1	1	1 MP	1	3	0	0
7049	12	1	2	1	1	2	1	1	1	1	1	1	2	1	1	1	1 MP	2		1	0
7050	12	1	2	1	1	3	0	1	1	1	1	1	1	1	1	1	1 MP	1	5	0	0
7051	12	1	2	1	0	3	0	1	1	2	1	1	1	1	2	1	1 MP	1	3	0	0
7053	12	1	2	1	1	3	0	1	1	1	1	1	1	1	1	1	1 MP	1	3	0	0
7055	8	0	2	1	1	3	0	1	1	1	1	1	1	1	1	1	1 MP	1	3	0	0
7056	8	0	2	1	1	4	0	1	2	1	1	1	1	2	2	1	1 MP	1	2	0	0
7057	8	0	2	1	1	4	0	1	1	1	2	1	2	2	1	1	1 MP	1	3	0	0
7058	8	0	2	1	1	3	1	1	1	1	1	1	1	1	1	1	1 MP	1	4	0	0
7059	8	0	2	1	1	4	1	1	2	1	1	1	1	2	1	1	1 MP	1	4	0	0
7060	8	0	2	1	0	3	0	1	1	1	1	1	1	1	1	1	1 MP	2		0	0
7061	8	0	2	1	0	3	0	1	1	1	1	1	1	1	1	1	1 MP	1	4	3	0
7062	6	0	2	1	1	2	0	1	1	1	1	1	1	1	1	1	1 MP	1	5	1	0
7063	8	0	2	1	1	4	0	1	1	1	1	1	1	1	1	1	1 MP	1	3	2	0
7064	8	0	2	1	1	3	1	1	1	1	1	1	1	1	1	1	1 MP	2		0	0
7065	8	0	2	1	1	3	0	1	1	1	1	1	1	1	1	1	1 MP	1	5	0	0
7066	6	0	3	1	1	4	0	2	2	2	2	2	2	2	2	2	1 MP	1	3	2	0
7067	6	0	3	1	1	3	1	1	1	1	1	1	1	1	1	1	1 MP	1	3	0	0
7068	6	0	3	2	0	3	1	1	1	1	1	1	1	1	1	1	1 MP	1	3	0	0
7070	6	0	3	1	1	3	1	1	1	1	1	1	1	1	1	1	1 MP	1	3	1	0
7071	8	1	3	1	1	3	0	1	1	1	1	1	1	1	1	1	1 MP	1	3	1	0
7072	8	1	3	1	0	3	0	1	1	1	1	1	2	1	1	1	1 MP	1	3	2	0
7073	8	1	3	1	1	3	1	1	1	1	1	1	1	1	1	1	1 MP	2		2	0
7074	8	1	3	1	1	3	0	1	1	1	1	1	1	1	1	1	1 MP	1	3	2	0
7075	8	1	3	1	1	3	0	1	1	1	1	1	1	1	1	1	1 MP	1	2	0	0
7077	8	1	3	1	0	3	0	1	1	1	1	1	1	1	1	1	1 MP	1	3	2	0
7078	8	1	3	1	1	3	1	1	1	1	1	1	1	1	1	1	1 MP	1	5	2	0
7082	6	1	4	2	0	3	1	1	1	1	1	1	1	1	1	1	1 MP	1	3	0	0
7083	6	1	4	1	0	3	0	1	1	1	1	1	1	1	1	1	1 MP	1	4	0	0
7085	6	1	4	1	0	3	0	1	1	1	1	1	1	1	1	1	1 MP	1	4	0	0
7086	5	0	4	1	0	3	0	1	1	1	1	1	1	1	1	1	1 MP	1	4	0	0
7087	5	0	4	1	0	3	0	1	1	1	1	1	1	1	1	1	1 MP	1	2	0	0
7088	6	0	3	2	1	3	1	1	1	1	1	1	1	1	1	1	1 MP	1	4	2	0
7089	5	0	4	1	0	3	0	1	1	1	1	1	1	1	1	1	1 MP	1	4	2	0
7090	11	0	1	2	1	3	1	2	1	1	1	1	2	1	2	1	1 MP	1	3	0	0
7091	22	1	1	1	0	3	1	1	1	1	1	1	1	1	1	1	1 MP	1	3	0	0
7092	22	1	1	2	1	3	1	1	1	1	1	1	1	1	1	1	1 MP	1	3	0	0
7093	22	1	1	2	1	2	1	2	1	1	1	1	2	1	1	1	1 MP	1	3	1	0
7095	8	0	2	1	1	3	1	1	1	1	1	1	1	1	1	1	1 MP	2		1	0
7096	8	0	2	1	1	4	1	1	1	1	1	1	1	2	1	1	1 MP	2		1	0
7097	8	0	2	1	0	3	0	1	1	1	1	1	1	2	1	1	1 MP	1	5	5	0
7098	8	0	2	1	1	2	0	1	2	1	1	1	1	1	2	1	1 MP	2		0	0
7099	8	1	3	2	1	3	1	1	1	1	1	1	1	1	2	1	1 MP	1	3	0	0
7100	6	0	3	1	1	3	0	1	1	1	1	1	1	1	1	1	1 MP	1	3	0	0
7101	6	0	3	2	0	2	1	1	1	1	1	1	1	1	1	1	1 MP	1	3	0	0
7102	6	0	3	2	0	4	1	1	2	1	2	1	1	1	1	1	1 MP	1	3	0	0
7103	6	0	3	1	1	3	1	1	1	1	1	1	1	1	2	1	1 MP	1	3	2	0
7104	6	0	3	2	1	3	1	1	1	1	1	1	2	2	1	1	1 MP	1	2	2	0
7105	6	0	3	2	0	3	0	1	1	1	1	1	1	1	2	2	1 MP	1	4	2	0
7106	5	0	4	1	0	3	1	1	1	1	1	1	1	1	1	1	1 MP	1	3	0	0
7107	6	1	4	1	1	2	1	1	2	1	1	1	1	1	1	1	1 MP	1	3	0	0
7110	6	1	4	1	1	2	1	1	1	1	1	1	1	1	2	1	1 MP	1	3	0	0
7111	11	0	1	1	1	2	1	1	1	1	1	1	1	1	2	1	1 MP	1	3	0	0
7112	11	0	1	1	0	3	0	1	2	1	1	1	2	1	1	1	1 MP	1	4	2	0
7113	22	1	1	1	0	3	1	1	1	1	1	1	1	1	1	1	1 MP	1	4	0	0
7114	8	0	2	2	1	2	1	2	1	1	1	1	1	1	2	1	1 MP	1	5	3	0
7115	12	1	2	1	1	3	1	2	2	1	1	1	1	1	2	1	1 MP	1	2	0	0
7116	12	1	2	1	1	2	0	1	1	1	1	1	1	1	2	1	1 MP	1	5	0	0
7117	5	0	4	1	0	3	0	1	2	1	1	1	1	1	2	1	1 MP	1	4	1	0
7119	11	0	1	2	0	3	0	1	1	1	1	1	1	2	1	1	1 MP	1	3	0	0
7121	11	0	1	1	1	2	1	1	1	1	1	1	1	1	1	1	1 MP	1	3	0	0
7123	22	1	1	1	1	3	0	1	1	2	1	1	1	1	2	1	1 MP	1	3	0	0
7124	22	1	1	1	1	3	1	1	1	1	1	1	2	1	2	1	1 MP	2		0	0
7125	12	1	2	2	1	3	0	1	1	1	1	1	1	1	1	1	1 MP	1	3	0	0
7126	22	1	1	1	1	3	0	1	1	1	1	1	1	2	2	1	1 MP	1	3	0	0
7128	8	0	2	1	0	3	1	1	1	2	1	1	1	1	1	1	1 MP	1	3	0	0
7129	8	0	2	2	0	3	1	1	1	1	1	1	1	1	1	1	1 MP	1	3	0	0
7130	8	0	2	2	0	4	1	1	1	1	1	1	1	1	2	2	1 MP	1	3	0	0
7132	8	0	2	1	1	3	0	1	1	1	1	1	1	2	1	1	1 MP	1	2	1	0
7133	8	0	2	1	1	3	0	1	2	1	1	1	1	1	1	1	1 MP	1	3	0	0
7135	12	1	2	1	1	3	0	1	1	1	1	1	1	1	1	1	1 MP	1	3	0	0
7136	5	0	4	1	1	4	0	1	2	1	2	1	1	2	1	1	1 MP	1	3	0	0
7137	5	0	4	2	0	4	1	1	1	1	1	1	1	1	2	1	1 MP	1	2	0	0
7138	5	0	4	1	1	4	0	1	1	1	1	1	1	2	1	1	1 MP	1	3	0	0
7139	6	1	4	3	1	3	1	1	1	1	1	1	1	1	1	1	1 MP	1	4	1	0
7140	6	1	4	1	1	3	0	1	1	1	1	1	1	1	1	1	1 MP	1	3	0	0
7141	22	1	1	2	1	3	1	1	1	1	1	1	1	1	1	1	1 MP	1	4	0	0
7142	12	1	2	1	1	3	1	1	1	1	1	1	1	1	1	1	1 MP	1	3	0	0
7143	12	1	2	1	1	4	1	1	1	1	1	2	2	1	2	1	1 MP	1	3	0	0
7144	8	1	3	1	1	3	1	1	1	1	1	1	1	2	1	1	1 MP	1	3	2	0
7145	22	1	1	1	1	3	1	1	1	1	1	1	1	1	2	1	1 MP	1	1	1	0
7146	8	1	3	1	1	3	1	1	1	1	1	1	1	1	1	1	1 MP	1	4	0	0
7147	8	1	3	1	0	4	0	1	1	1	1	1	2	1	1	1	1 MP	1	3	0	0
7148	11	0	1	2	1	3	1	1	1	1	1	1	1	1	1	1	1 MP	1	3	0	0
7149	11	0	1	2	1	3	1	1	1	1	1	1	1	1	1	1	1 MP	1	3	0	0
7150	11	0	1	1	1	3	1	1	1	1	1	1	1	1	1	1	1 MP	1	4	2	0
7151	11	0	1	1	1	4	1	1	1	1	1	1	1	1	1	1	1 MP	1	4	0	0
7152	11	0	1	1	1	3	0	1	1	1	1	1	1	1	1	1	1 MP	1	3	0	0
7153	11	0	1	2	1	3	0	1	1	1	1	1	1	1	1	1	1 MP	1	4	0	0
7154	11	0	1	1	1	5	0	1	1	1	1	1	1	2	1	1	1 MP	1	3	4	0
7155	11	0	1	1	1	3	1	1	1	1	1	1	1	1	1	1	1 MP	1	3	0	0
7156	22	1	1	2	0	3	1	1	1	1	1	1	1	1	2	1	1 MP	1	3	0	0
7158	22	1	1	1	1	3	1	1	1	1	1	1	1	1	1	1	1 MP	1	2	0	0
7159	22	1	1	2	1	3	0	1	1	1	1	1	1	1	1	1	1 MP	1	3	1	0
7160	8	0	2	3	1	3	1	1	1	1	1	1	1	1	1	1	1 MP	1	3	5	0
7161	8	0	2	1	0	3	0	1	1	1	1	1	1	1	1	1	1 MP	1	3	0	0
7162	8	0	2	1	1	3	0	1	1	1	1	1	1	1	1	1	1 MP	1	1	0	0
7163	8	0	2	1	1	4	0	1	1	1	1	1	2	2	1	1	1 MP	1	4	1	0
7164	8	0	2	1	1	3	1	1	1	1	1	1	1	1	1	1	1 MP	1	3	0	0
7166	12	1	2	1	1	3	0	1	1	1	1	1	1	1	1	1	1 MP	1	2	0	0
7169	8	1	3	1	1	2	0	1	1	1	1	1	1	1	1	1	1 MP	1	4	0	0
7171	5	0	4	1	1	3	1	1	1	1	1	1	1	1	1	1	1 MP	1	3	2	0
7172	5	0	4	1	1	3	0	1	1	1	1	1	1	1	1	1	1 MP	1	2	0	0
7173	5	0	4	1	1	2	0	1	1	1	1	1	1	1	1	1	1 MP	1	3	3	0
7175	5	0	4	1	0	3	1	1	2	1	1	1	1	1	1	1	1 MP	1	3	6	0
7178	6	1	4	1	1	3	1	1	2	1	1	1	1	1	2	1	1 MP	1	5	4	0
7179	6	1	4	1	0	2	0	1	1	1	1	1	1	1	1	1	1 MP	2		11	1
7180	11	0	1	1	0	2	0	1	1	1	1	1	1	1	1	1	1 MP	1	4	0	0
7181	11	0	1	1	0	3	0	1	1	1	1	1	1	1	1	1	1 MP	1	4	0	0
7182	22	1	1	1	1	3	1	1	1	1	1	1	1	1	1	1	1 MP	1	5	1	0
7183	8	0	2	2	1	3	0	1	1	1	1	1	2	1	1	1	1 MP	1	3	0	0
7184	8	0	2	1	1	4	1	1	1	1	1	1	1	2	1	1	1 MP	1	5	2	0
7185	8	0	2	2	1	3	1	1	1	1	1	1	1	1	1	1	1 MP	1	4	0	0
7186	8	0	2	2	1	3	1	1	1	1	1	1	1	1	2	1	1 MP	1	3	0	0
7187	8	0	2	1	1	3	0	1	1	1	1	1	1	1	1	1	1 MP	1	3	0	0
7189	6	0	3	1	0	2	0	1	1	1	1	1	1	1	1	1	1 MP	1	5	2	0
7190	8	1	3	1	1	3	0	1	1	1	1	1	1	1	1	1	1 MP	1	5	0	0
7191	8	1	3	1	1	3	1	1	1	1	1	1	1	1	1	1	1 MP	2		0	0
7192	8	1	3	3	1	3	0	1	1	1	1	1	1	1	1	1	1 MP	1	4	4	0
7193	8	1	3	1	1	3	0	1	1	1	1	1	1	2	1	1	1 MP	1	4	2	0
7194	5	0	4	1	1	3	1	1	1	1	1	1	1	1	1	1	1 MP	1	5	0	0
7196	6	0	3	1	1	2	0	1	1	1	1	1	1	1	1	1	1 MP	1	2	2	0
7197	5	0	4	3	1	4	1	1	1	1	1	1	1	2	1	1	1 MP	1	2	0	0
7200	8	0	2	3	1	4	1	1	1	1	1	1	1	1	1	1	1 MP	1	3	0	0
7201	8	0	2	2	0	3	0	1	2	1	1	1	1	1	1	1	1 MP	1	3	0	0
7202	6	0	3	3	1	2	0	1	1	1	1	1	1	1	1	1	1 MP	1	3	0	0
7203	6	0	3	1	1	3	0	1	1	1	1	1	1	1	1	1	1 MP	1	3	0	0
7204	8	1	3	1	1	3	1	1	1	1	1	1	1	1	1	1	1 MP	1	3	1	0
7205	8	1	3	2	1	4	0	1	1	1	1	1	1	2	1	1	1 MP	1	3	0	0
7206	5	0	4	1	0	4	0	1	1	1	1	1	1	1	1	1	1 MP	1	3	0	0
7207	6	1	4	2	0	3	0	1	1	1	1	1	1	1	1	1	1 MP	1	3	1	0
7208	6	1	4	1	1	3	0	1	1	1	1	1	1	1	1	1	1 MP	1	2	0	0
7210	22	1	1	2	0	3	1	1	1	1	1	1	1	1	1	1	1 MP	2		4	0
7211	22	1	1	2	0	3	0	1	1	1	1	1	1	1	1	1	1 MP	1	3	4	0
7212	22	1	1	2	1	3	1	1	1	1	1	1	1	1	1	1	1 MP	2		12	1
7213	8	0	2	2	1	4	0	1	1	1	1	1	1	1	1	1	1 MP	1	3	1	0
7214	12	1	2	2	0	4	0	1	1	1	1	1	1	2	1	1	1 MP	1	4	0	0
7215	12	1	2	2	1	3	0	1	1	1	1	1	1	1	1	1	1 MP	1	3	3	0
7216	12	1	2	2	1	3	1	1	1	1	1	1	1	1	1	1	1 MP	1	2	3	0
7217	6	0	3	1	0	2	1	1	1	1	1	1	1	1	2	1	1 MP	1	3	13	1
7218	8	1	3	1	1	5	1	1	1	1	1	1	1	1	1	1	1 MP	1	3	4	0
7219	8	1	3	1	1	2	1	1	1	1	1	1	1	1	1	1	1 MP	1	5	2	0
7220	8	1	3	1	1	3	0	1	1	1	1	1	1	1	1	1	1 MP	1	3	1	0
7221	5	0	4	1	1	1	0	1	2	1	1	1	1	1	1	1	1 MP	1	2	0	0
7222	11	0	1	2	0	3	1	1	1	1	1	1	1	2	1	1	1 MP	1	1	2	0
7223	11	0	1	3	1	3	1	1	1	1	1	1	1	1	1	1	1 MP	1	2	0	0
7225	11	0	1	1	1	3	0	1	1	1	1	1	1	1	1	1	1 MP	1	3	0	0
7227	11	0	1	2	1	4	1	1	1	1	1	1	2	1	1	1	1 MP	1	2	0	0
7232	8	0	2	1	0	2	1	1	1	1	2	1	1	1	1	1	1 MP	1	2	2	0
7233	12	1	2	1	0	4	0	1	1	1	1	1	1	2	1	1	1 MP	1	3	0	0
7234	12	1	2	2	1	3	1	1	1	1	1	1	1	1	1	1	1 MP	1	3	2	0
7235	12	1	2	1	1	3	1	1	1	1	1	1	1	1	2	1	1 MP	1	4	1	0
7238	6	0	3	1	1	3	1	1	1	1	1	1	1	1	1	1	1 MP	1	3	0	0
7239	6	0	3	1	1	2	1	1	1	2	1	1	1	1	1	1	1 MP	1	3	2	0
7240	6	0	3	1	0	2	1	1	1	1	1	1	1	1	1	1	1 MP	1	5	6	0
7241	6	0	3	1	1	3	1	2	1	1	1	1	2	1	1	1	1 MP	1	3	2	0
7242	6	0	3	2	0	2	0	1	1	1	1	1	1	1	2	1	1 MP	1	3	1	0
7243	6	0	3	3	1	3	0	1	1	1	1	1	1	1	1	1	1 MP	1	4	0	0
7244	6	0	3	1	1	3	1	1	1	1	1	1	1	1	2	1	1 MP	1	3	1	0
7245	8	1	3	1	1	4	1	1	1	1	1	1	1	1	2	1	1 MP	1	2	0	0
7246	8	1	3	1	1	3	1	1	1	1	1	1	2	1	2	1	1 MP	1	4	2	0
7247	8	1	3	1	1	3	0	1	1	1	1	1	1	1	2	1	1 MP	1	3	4	0
7248	8	1	3	3	1	4	0	1	1	1	1	1	1	1	1	1	1 MP	2		10	1
7249	8	1	3	1	0	1	1	1	1	1	1	1	1	1	1	1	1 MP	1	4	0	0
7250	8	1	3	1	0	3	0	1	1	1	1	1	1	1	1	1	1 MP	1	4	0	0
7251	5	0	4	1	1	3	0	1	1	1	1	1	1	1	1	1	1 MP	1	3	1	0
7252	5	0	4	2	0	3	1	1	1	1	1	1	1	1	1	1	1 MP	1	3	1	0
7253	5	0	4	2	0	3	1	1	1	1	1	1	2	1	1	1	1 MP	1	3	5	0
7255	8	1	3	1	1	3	1	1	1	1	1	1	1	1	1	1	1 MP	1	4	3	0
7256	12	1	2	2	0	3	0	1	1	1	1	1	1	1	1	1	1 MP	1	4	1	0
7257	6	1	4	2	1	1	1	1	1	1	1	1	1	1	1	1	1 MP	1	3	0	0
7258	11	0	1	1	0	2		1	1	1	1	1	1	1	1	1	1 MP	1	3	0	0
7260	22	1	1	1	1	3	1	1	1	1	1	1	1	1	1	1	1 MP	1	3	0	0
7262	12	1	2	1	1	3	0	1	1	1	1	1	1	1	1	1	1 MP	1	5	2	0
7263	12	1	2	1	0	2	1	1	1	1	1	1	1	1	1	1	1 MP	1	3	6	0
7264	12	1	2	1	1	3	0	1	1	1	1	1	1	1	1	1	1 MP	1	3	3	0
7265	6	0	3	2	0	4	0	1	1	1	1	1	1	1	2	1	1 MP	1	3	0	0
7266	8	1	3	1	1	4	0	1	1	1	1	1	2	1	1	1	1 MP	1	3	0	0
7267	8	1	3	1	1	3	0	1	1	1	1	1	1	1	1	1	1 MP	1	2	4	0
7268	8	1	3	1	0	3	0	1	1	1	1	1	1	2	2	1	1 MP	1	2	0	0
7269	5	0	4	1	1	3	1	2	1	1	1	1	1	1	1	2	1 MP	1	3	0	0
7271	11	0	1	2	1	4	0	1	1	1	1	1	1	1	2	1	1 MP	2		0	0
7273	12	1	2	1	1	3	1	1	1	1	1	1	1	1	1	1	1 MP	1	4	0	0
7274	6	0	3	1	1	2	1	1	1	1	1	1	1	1	2	1	1 MP	2		0	0
7275	6	1	4	1	0	1	1	1	1	1	1	1	1	1	2	1	1 MP	1	4	0	0
7276	5	0	4	1	1	3	1	1	1	1	1	1	1	1	1	1	1 MP	1	2	0	0
7277	8	1	3	1	0	4	1	1	1	1	1	1	1	1	1	1	1 MP	1	2	0	0
7278	11	0	1	1	0	4	1	2	1	1	1	2	2	2	2	1	1 MP	1	4	0	0
7279	11	0	1	2	0	3	1	1	1	1	1	1	1	1	1	1	1 MP	1	3	0	0
7280	11	0	1	2	1	4	1	1	1	1	1	1	1	1	1	1	1 MP	1	3	0	0
7281	11	0	1	1	1	4	1	2	2	1	1	1	1	1	1	1	1 MP	2		0	0
7282	11	0	1	1	0	3	1	1	1	1	1	1	1	1	1	1	1 MP	1	3	0	0
7283	11	0	1	2	0	2	0	1	1	1	1	2	1	1	2	1	1 MP	1	3	0	0
7285	11	0	1	1	1	2	1	1	1	1	1	1	1	1	1	1	1 MP	1	3	0	0
7286	11	0	1	2	0	3	1	2	1	1	1	2	1	1	1	1	1 MP	1	3	0	0
7287	8	0	2	1	1	2	1	1	1	1	1	1	1	1	2	2	1 MP	1	3	1	0
7289	11	0	1	1	0	3	1	1	1	1	1	1	1	1	1	1	1 MP	1	4	0	0
7290	11	0	1	1	1	4	1	1	1	1	1	1	1	1	2	2	1 MP	1	1	1	0
7291	11	0	1	2	1	3	1	1	1	1	1	1	1	1	1	1	1 MP	1	2	3	0
7292	11	0	1	1	1	4	0	1	1	1	1	1	1		1	1	1 MP	1	4	7	0
7293	11	0	1	2	0	3	0	1	1	1	1	1	1	1	1	1	1 MP	1	2	3	0
7294	22	1	1	1	1	4	1	1	1	1	2	1	1	1	1	1	1 MP	1	3	0	0
7295	22	1	1	1	1	3	1	1	1	1	1	1	1	1	1	1	1 MP	1	3	2	0
7299	22	1	1	1	1	3	0	1	1	1	1	1	1	1	1	1	1 MP	1	4	0	0
7300	22	1	1	1	1	3	0	1	1	1	1	1	1	2	2	1	1 MP	1	3	0	0
7301	22	1	1	2	1	2	0	1	1	1	1	1	1	1	1	1	1 MP	1	3	2	0
7302	12	1	2	3	1	3	0	1	1	1	2	1	1	1	2	1	1 MP	1	3	0	0
7303	8	0	2	1	1	4	0	1	1	1	1	1	1	1	2	1	1 MP	1	3	0	0
7304	8	0	2	2	1	4	1	1	2	1	1	1	1	1	1	1	1 MP	1	4	0	0
7305	6	0	3	1	1	3	1	1	1	1	1	1	1	1	1	1	1 MP	1	3	0	0
7306	8	0	2	1	1	4	0	1	2	1	1	1	1	2	1	1	1 MP	1	3	0	0
7307	8	0	2	1	1	3	0	1	1	1	1	1	1	1	1	1	1 MP	1	3	0	0
7308	8	0	2	2	1	2	1	1	1	1	1	2	2	1	1	1	1 MP	1	3	0	0
7309	12	1	2	1	1	2	1	1	1	1	1	1	1	1	1	1	1 MP	1	3	0	0
7310	12	1	2	1	1	3	1	1	2	1	1	1	1	1	1	1	1 MP	1	4	0	0
7313	12	1	2	2	1	1	0	1	2	1	1	1	1	1	1	1	1 MP	2		0	0
7314	12	1	2	1	1	1	0	1	1	1	1	1	1	1	1	1	1 MP	1	2	0	0
7316	5	0	4	1	1	3	1	1	1	1	1	1	1	1	1	1	1 MP	1	4	0	0
7317	5	0	4	1	1	3	1	1	1	1	1	1	1	1	1	1	1 MP	1	3	7	0
7318	5	0	4	1	1	2	1	1	1	1	1	1	1	1	1	1	1 MP	1	3	0	0
7319	5	0	4	1	0	5	1	1	1	1	1	1	1	1	1	1	1 MP	1	3	0	0
7320	6	0	3	1	0	4	1	1	1	1	1	1	1	1	2	1	1 MP	1	3	0	0
7321	5	0	4	1	0	4	1	1	1	1	1	1	1	1	1	1	1 MP	1	4	3	0
7323	5	0	4	2	1	4	0	1	1	1	1	1	1	2	2	1	1 MP	1	3	0	0
7324	5	0	4	1	0	3	1	1	1	1	1	1	1	1	1	1	1 MP	1	3	0	0
7325	5	0	4	1	0	4	0	1	1	1	1	1	1	1	2	1	1 MP	1	3	0	0
7326	5	0	4	1	0	4	1	1	1	1	1	1	1	1	2	1	1 MP	1	3	1	0
7327	5	0	4	1	0	3	0	1	1	1	1	1	1	1	2	1	1 MP	1	3	3	0
7328	5	0	4	1	0	4	0	1	1	1	1	1	1	1	2	1	1 MP	1	3	2	0
7329	6	1	4	1	1	5	1	1	2	1	1	1	1	2	1	1	1 MP	1	3	0	0
7330	6	1	4	1	1	4	1	1	1	1	1	1	1	1	1	1	1 MP	1	5	0	0
7331	6	1	4	1	1	3	1	1	2	1	1	1	1	1	1	1	1 MP	1	3	0	0
7332	6	1	4	1	1	3	0	1	1	1	1	1	1	1	1	1	1 MP	1	3	0	0
7334	6	1	4	2	1	4	0	1	1	1	1	1	2	1	2	1	1 MP	1	3	1	0
7335	6	1	4	2	1	4	0	1	1	1	1	1	1	2	1	1	1 MP	1	2	0	0
7337	6	1	4	1	0	4	0	1	1	1	1	1	1	1	1	1	1 MP	1	3	1	0
7338	6	0	3	1	0	3	1	1	2	1	1	1	1	2	1	1	1 MP	1	3	3	0
7339	6	0	3	1	1	4	1	1	1	1	1	1	1	1	1	1	1 MP	1	4	0	0
7340	6	0	3	1	0	3	1	2	1	1	2	1	2	1	2	1	1 MP	1	3	0	0
7341	22	1	1	2	1	3	0	2	1	1	1	1	2	1	1	1	1 MP	1	5	3	0
7342	11	0	1	1	0	3	0	1	1	1	1	1	1	2	1	1	1 MP	1	2	0	0
7343	11	0	1	3	1	3	1	1	1	1	1	1	1	2	1	1	1 MP	1	2	2	0
7344	11	0	1	2	1	3	0	1	1	1	1	1	1	2	2	1	1 MP	1	4	0	0
7346	11	0	1	2	1	5	0	1	1	2	1	1	1	2	1	2	1 MP	1	3	12	1
7347	22	1	1	2	0	3	0	1	2	1	1	1	1	1	1	1	1 MP	2		0	0
7348	22	1	1	2	1	4	1	1	1	1	1	1	1	1	2	1	1 MP	1	3	0	0
7349	22	1	1	2	1	3	0	1	1	1	1	1	1	2	1	1	1 MP	1	3	0	0
7350	22	1	1	1	1	3	0	1	1	1	1	1	1	2	1	1	1 MP	1	3	1	0
7353	11	0	1	2	0	4	0	1	1	1	1	1	1	2	1	1	1 MP	1	3	0	0
7354	8	0	2	3	0	4	1	1	1	2	2	1	1	1	1	1	1 MP	1	3	0	0
7355	8	0	2	2	1	5	1	1	1	1	1	1	1	2	1	1	1 MP	1	3	0	0
7356	8	0	2	1	1	3	1	1	1	1	1	1	1	1	1	1	1 MP	1	3	0	0
7357	8	0	2	2	1	3	0	1	1	1	1	1	1	1	2	1	1 MP	1	3	0	0
7358	8	0	2	2	0	4	1	1	1	1	1	1	1	2	1	1	1 MP	1	3	9	1
7360	12	1	2	1	1	3	0	1	1	1	1	1	1	1	1	1	1 MP	1	4	0	0
7361	12	1	2	1	1	3	0	1	1	1	1	1	1	1	1	1	1 MP	1	3	0	0
7362	12	1	2	1	1	4	1	1	1	1	1	1	1	1	1	1	1 MP	1	4	0	0
7369	12	1	2	2	1	3	0	1	1	1	1	2	2	1	1	1	1 MP	1	2	3	0
7370	5	0	4	1	0	3	1	1	1	1	1	1	1	1	2	1	1 MP	1	3	0	0
7374	5	0	4	2	1	3	1	1	1	1	1	1	1	2	1	1	1 MP	1	3	4	0
7375	5	0	4	1	0	3	0	1	1	1	1	1	1	2	1	1	1 MP	1	3	1	0
7376	5	0	4	1	0	3	0	1	1	1	1	1	1	1	1	1	1 MP	1	3	7	0
7377	6	1	4	1	0	2	1	1	1	1	1	1	1	1	1	1	1 MP	1	3	1	0
7381	6	1	3	1	1	3	1	1	1	1	1	1	1	1	1	1	1 MP	1	3	0	0
7382	6	1	4	1	1	3	0	1	1	1	1	1	1	1	1	1	1 MP	1	4	1	0
7385	11	0	1	2	0	2	0	1	1	1	1	1	1	1	1	1	1 MP	1	2	1	0
7386	11	0	1	2	0	4	1	1	1	1	1	1	1	1	1	1	1 MP	1	2	4	0
7387	11	0	1	1	1	3	0	1	1	2	1	1	1	1	1	1	1 MP	1	3	0	0
7388	11	0	1	2	1	1	0	1	1	1	1	1	1	1	1	1	1 MP	1	4	2	0
7389	11	0	1	2	0	3	1	1	1	1	1	1	1	1	1	1	1 MP	1	3	0	0
7390	11	0	1	1	1	2	1	1	1	1	1	1	1	1	1	1	1 MP	1	4	0	0
7391	22	1	1	1	1	3	1	1	1	1	1	1	1	1	1	1	1 MP	1	3	0	0
7392	22	1	1	1	1	3	1	1	1	1	1	1	1	2	1	1	1 MP	1	4	0	0
7393	22	1	1	2	0	3	1	1	1	1	1	1	1	1	1	1	1 MP	1	3	0	0
7394	22	1	1	1	1	3	0	1	1	1	1	1	1	1	1	1	1 MP	1	4	0	0
7395	8	0	2	2	1	2	0	1	1	1	1	1	1	1	1	1	1 MP	1	3	0	0
7396	8	0	2	1	1	2	0	1	1	1	1	1	1	1	1	1	1 MP	1	4	0	0
7397	8	0	2	2	1	5	0	1	1	1	1	1	1	1	1	1	1 MP	1	3	0	0
7398	8	0	2	1	1	2	1	1	1	1	1	1	1	1	2	1	1 MP	1	3	0	0
7399	8	0	2	1	1	1	1	1	1	1	1	1	1	1	2	1	1 MP	1	4	0	0
7401	12	1	2	2	1	3	1	1	1	1	1	1	1	1	2	1	1 MP	1	4	0	0
7402	12	1	2	2	0	4	1	1	1	1	1	1	1	1	1	1	1 MP	1	4	0	0
7403	12	1	2	2	1	3	1	1	1	1	1	1	1	1	2	1	1 MP	1	3	0	0
7404	6	0	3	1	0	4	0	1	1	1	1	1	1	1	1	1	1 MP	1	3	0	0
7405	6	0	3	1	1	3	0	1	1	1	1	1	1	2	1	1	1 MP	1	2	0	0
7406	6	0	3	1	0	3	0	1	1	1	1	1	1	1	1	1	1 MP	1	3	0	0
7407	6	0	3	1	1	4	0	1	1	1	1	1	1	2	1	1	1 MP	1	3	0	0
7408	6	0	3	2	1	3	1	1	1	1	1	1	1	2	1	1	1 MP	1	3	0	0
7409	6	0	3	1	1	1	0	2	1	1	1	1	2	1	2	1	1 MP	1	2	1	0
7411	8	1	3	2	1	1	1	1	1	1	1	1	1	1	1	1	1 MP	1	4	0	0
7412	8	1	3	2	1	3	0	1	1	1	1	1	1	1	1	1	1 MP	1	5	0	0
7413	6	1	4	1	1	3	1	1	1	1	1	1	1	1	1	1	1 MP	1	4	3	0
7414	5	0	4	1	1	3	1	1	1	1	1	1	1	1	2	1	1 MP	1	5	0	0
7415	5	0	4	2	0	3	0	1	1	1	1	1	1	1	1	1	1 MP	1	4	0	0
7416	5	0	4	1	1	3	1	1	1	1	1	1	2	1	1	1	1 MP	1	4	4	0
7417	5	0	4	1	0	3	0	1	1	1	1	1	1	1	2	1	1 MP	1	4	6	0
7418	5	0	4	1	0	3	1	1	1	2	1	1	1	1	1	1	1 MP	1	2	0	0
7419	6	1	4	3	1	3	0	1	1	1	1	2	1	1	1	1	1 MP	1	4	0	0
7420	6	1	4	1	1	3	1	1	1	1	1	1	1	1	2	1	1 MP	1	3	0	0
7421	6	1	4	1	1	4	1	1	2	1	2	1	1	1	1	1	1 MP	1	3	0	0
7422	11	0	1	1	1	3	1	1	1	1	1	1	1	1	2	1	1 MP	1	4	0	0
7423	22	1	1	2	1	3	1	1	1	1	1	1	1	1	1	1	1 MP	1	2	0	0
7424	8	0	2	1	1	2	1	1	1	1	1	1	1	1	1	1	1 MP	1	4	0	0
7425	8	0	2	1	1	3	1	1	1	1	1	1	1	1	1	1	1 MP	1	3	0	0
7426	8	0	2	1	0	3	1	1	1	1	1	1	1	1	1	1	1 MP	1	3	0	0
7427	8	0	2	2	1	4	0	1	1	1	1	1	1	2	1	1	1 MP	1	1	1	0
7428	6	0	2	1	1	3	0	1	1	1	1	1	1	1	2	1	1 MP	1	2	0	0
7430	12	1	2	1	0	2	1	1	1	1	1	1	1	1	1	1	1 MP	1	3	0	0
7431	12	1	2	2	1	2	1	1	1	1	1	1	1	1	1	1	1 MP	1	3	0	0
7432	12	1	2	1	1	3	1	1	1	2	1	1	1	1	2	1	1 MP	1	5	0	0
7433	12	1	2	3	1	1	0	1	2	1	1	1	1	1	1	1	1 MP	1	5	2	0
7434	12	1	2	1	1	1	1	1	1	1	1	1	1	1	1	1	1 MP	1	3	0	0
7435	12	1	2	2	1	3	0	1	1	1	1	1	1	1	1	1	1 MP	1	3	0	0
7436	12	1	2	1	1	2	1	1	1	1	1	1	1	1	2	1	1 MP	1	4	0	0
7437	12	1	2	1	1	3	1	2	1	1	1	1	1	1	1	1	1 MP	1	3	0	0
7438	6	0	3	1	0	3	0	1	1	1	1	2	1	1	1	1	1 MP	1	4	0	0
7439	6	0	3	1	1	3	1	2	1	1	1	1	2	1	2	1	1 MP	1	3	0	0
7440	6	0	3	1	0	3	0	1	1	1	1	1	1	1	2	1	1 MP	1	3	0	0
7441	6	0	3	2	1	3	0	1	1	1	1	1	1	1	1	1	1 MP	1	3	7	0
7442	6	0	3	1	0	2	1	1	1	1	1	1	1	1	1	1	1 MP	1	2	0	0
7443	6	0	3	1	0	3	1	1	1	1	1	1	1	2	2	1	1 MP	1	2	0	0
7444	6	0	3	1	0	4	1	1	1	1	1	1	1	1	1	1	1 MP	1	3	0	0
7445	6	0	3	3	0	3	0	1	1	1	1	1	1	1	1	1	1 MP	1	3	3	0
7446	6	0	3	2	0	3	1	1	1	1	1	1	1	1	1	1	1 MP	1	3	0	0
7448	8	1	3	1	0	2	0	1	1	1	1	2	1	2	1	1	1 MP	2		1	0
7449	8	1	3	1	1	3	1	1	1	1	1	1	2	2	1	1	1 MP	1	3	0	0
7450	5	0	4	1	1	3	0	1	1	1	1	1	1	2	1	1	1 MP	1	4	4	0
7451	5	0	4	1	0	4	0	1	1	1	1	1	1	1	1	1	1 MP	1	2	0	0
7452	6	0	3	1	1	1	1	1	1	1	1	1	1	1	2	1	1 MP	1	3	0	0
7453	5	0	4	1	1	4	1	1	1	1	1	1	1	1	1	1	1 MP	1	2	0	0
7454	5	0	4	1	1	3	1	1	1	1	1	1	1	2	1	1	1 MP	1	2	1	0
7455	5	0	4	3	1	4	0	1	1	1	1	1	1	1	1	1	1 MP	1	3	0	0
7456	5	0	4	2	1	3	1	1	1	1	1	1	1	1	2	1	1 MP	1	2	0	0
7457	5	0	4	1	0	4	1	1	1	1	1	1	1	1	1	1	1 MP	1	3	1	0
7458	5	0	4	1	0	3	1	1	1	1	1	1	1	1	1	1	1 MP	1	2	0	0
7462	6	1	4	1	1	2	1	1	1	1	1	1	1	1	1	1	1 MP	1	3	0	0
7463	6	1	4	1	0	3	1	1	1	1	1	1	1	1	1	1	1 MP	2		10	1
7464	6	1	4	1	0	3	0	1	1	1	1	1	1	1	1	1	1 MP	1	3	0	0
7465	6	1	4	2	1	3	1	1	1	1	1	1	2	2	2	1	1 MP	1	3	0	0
7466	6	1	4	3	1	3	0	1	1	1	1	1	1	1	1	1	1 MP	1	3	1	0
7467	6	1	4	1	1	3	1	1	1	1	1	1	1	1	1	1	1 MP	1	3	0	0
7469	11	0	1	1	1	2	0	2	1	1	1	2	2	1	1	1	1 MP	1	4	2	0
7470	11	0	1	1	0	3	1	1	2	1	2	1	1	1	1	1	1 MP	1	4	3	0
7471	11	0	1	1	0	3	1	1	1	1	1	1	1	2	1	1	1 MP	1	4	0	0
7472	11	0	1	2	1	2	0	1	1	1	1	1	2	1	2	1	1 MP	1	3	0	0
7473	11	0	1	2	1	3	1	1	1	1	1	1	1	1	1	1	1 MP	1	3	0	0
7474	11	0	1	1	1	3	1	1	1	1	1	1	1	1	2	1	1 MP	1	3	10	1
7476	12	1	2	1	1	3	1	1	1	1	1	1	1	1	2	1	1 MP	1	3	0	0
7479	22	1	1	2	1	1	1	1	1	2	1	1	1	1	1	1	1 MP	1	4	0	0
7480	22	1	1	2	1	3	1	1	1	1	1	1	1	1	2	1	1 MP	2		0	0
7481	22	1	1	1	0	3	1	1	1	1	1	1	1	1	2	1	1 MP	1	4	0	0
7482	22	1	1	1	0	3	1	1	1	1	1	1	1	1	1	1	1 MP	1	3	0	0
7483	8	0	2	1	1	3	1	1	1	2	2	1	1	1	1	1	1 MP	1	3	0	0
7484	8	0	2	1	0	3	0	1	1	1	1	1	1	1	2	1	1 MP	1	3	2	0
7485	8	0	2	1	0	2	1	1	1	1	1	1	1	1	2	1	1 MP	1	3	4	0
7487	12	1	2	1	0	3	1	1	1	1	1	1	1	2	1	1	1 MP	1	2	8	1
7488	12	1	2	1	1	3	1	1	1	1	1	1	1	1	1	1	1 MP	1	5	0	0
7489	12	1	2	1	1	4	1	1	1	1	1	1	1	1	2	1	1 MP	1	4	0	0
7491	12	1	2	2	1	4	0	1	1	1	1	1	1	2	1	1	1 MP	1	3	0	0
7492	12	1	2	1	0	4	0	1	1	1	1	1	1	2	1	1	1 MP	1	3	0	0
7494	12	1	2	2	1	3	0	1	1	1	1	1	1	1	1	1	1 MP	1	4	1	0
7495	12	1	2	2	1	4	0	1	1	1	1	1	1	1	1	1	1 MP	2		0	0
7496	6	0	3	2	1	3	1	1	1	1	1	1	1	1	1	1	1 MP	1	3	0	0
7497	6	0	3	2	1	4	1	1	1	1	1	2	1	2	1	1	1 MP	1	2	2	0
7498	6	0	3	1	0	2	0	2	1	1	1	1	1	1	1	1	1 MP	1	3	2	0
7499	6	0	3	1	0	3	0	1	1	1	1	1	1	1	1	1	1 MP	1	3	2	0
7500	6	0	3	1	0	4	0	1	2	1	1	1	1	2	1	1	1 MP	1	3	1	0
7501	8	1	3	1	1	4	0	1	1	1	1	1	1	1	1	1	1 MP	1	2	2	0
7504	8	1	3	1	1	3	1	1	1	1	1	1	1	1	1	1	1 MP	1	5	2	0
7507	8	1	3	1	1	3	1	2	1	2	2	1	1	2	2	1	1 MP	1	2	1	0
7508	8	1	3	2	1	3	0	1	1	1	1	1	1	1	1	1	1 MP	1	3	0	0
7509	6	0	3	1	1	3	0	1	1	1	1	1	2	1	1	1	1 MP	1	2	0	0
7510	6	1	4	2	1	3	0	1	1	1	1	1	1	1	1	1	1 MP	1	3	0	0
7511	5	0	4	1	1	4	0	1	1	1	1	1	1	2	1	1	1 MP	1	4	2	0
7512	5	0	4	2	0	3	0	2	1	1	1	1	2	1	1	1	1 MP	1	3	4	0
7513	5	0	4	1	1	3	1	1	1	1	1	1	1	2	2	1	1 MP	1	2	0	0
7514	5	0	4	1	0	3	0	1	1	1	1	1	1	1	1	1	1 MP	1	3	3	0
7515	5	0	4	2	1	2	1	1	1	1	2	1	1	1	2	1	1 MP	1	2	0	0
7516	6	1	4	1	1	3	1	1	1	1	1	1	1	1	1	1	1 MP	1	4	0	0
7518	11	0	1	1	1	2	0	1	1	1	1	1	1	1	2	1	1 MP	1	4	0	0
7519	8	0	2	1	1	4	0	1	1	1	1	1	1	1	1	1	1 MP	1	3	0	0
7520	12	1	2	2	1	3	1	1	1	1	1	1	1	1	1	1	1 MP	1	3	0	0
7521	12	1	2	3	1	3	1	1	1	1	1	1	1	1	1	1	1 MP	1	3	0	0
7522	6	0	3	1	0	3	0	1	1	1	1	1	1	1	1	1	1 MP	1	3	0	0
7523	6	0	3	1	0	4	1	1	1	1	1	1	1	1	1	1	1 MP	1	4	7	0
7524	6	1	3	2	1	4	1	1	1	1	1	1	1	1	1	1	1 MP	1	3	0	0
7525	11	0	1	1	1	3	1	1	1	1	1	1	1	1	1	1	1 MP	1	3	0	0
7526	11	0	1	2	1	4	0	1	1	1	1	1	1	1	1	1	1 MP	1	3	0	0
7527	11	0	1	2	1	3	1	1	1	1	1	1	1	1	1	1	1 MP	1	3	0	0
7529	11	0	1	2	0	3	0	1	1	1	1	1	1	1	1	1	1 MP	1	3	8	1
7530	11	0	1	1	1	4	0	1	1	1	1	1	1	2	1	1	1 MP	1	3	1	0
7531	11	0	1	1	1	4	0	1	1	1	1	1	2	2	2	1	1 MP	1	3	0	0
7532	11	0	1	1	1	5	0	1	1	1	1	2	2		2	1	1 MP	1	3	0	0
7533	8	0	2	1	1	2	0	1	1	1	1	1	1	1	1	1	1 MP	1	2	11	1
7534	22	1	1	1	0	4	0	1	1	1	1	1	1	2	1	1	1 MP	1	2	6	0
7535	22	1	1	3	1	4	1	1	1	1	1	1	2	1	2	1	1 MP	1	4	2	0
7536	22	1	1	2	1	3	1	1	2	1	1	2	2	1	1	1	1 MP	1	3	0	0
7537	22	1	1	1	1	5	0	1	1	1	1	1		2	1	1	1 MP	1	2	2	0
7538	22	1	1	2	1	4	0	1	1	1	1	1	1	1	2	1	1 MP	1	5	0	0
7539	22	1	1	3	1	4	0	1	1	1	1	2	2	1	1	1	1 MP	1	4	0	0
7540	22	1	1	1	1	4	0	1	1	1	1	1	1	2	2	1	1 MP	1	4	0	0
7541	22	1	1	1	1	3	1	1	1	2	1	1	1	1	1	1	1 MP	1	3	0	0
7542	22	1	1	2	1	3	0	2	1	1	1	1	1	2	1	1	1 MP	1	4	0	0
7543	22	1	1	2	1	3	1	1	1	1	1	1	1	1	1	1	1 MP	1	3	0	0
7544	11	0	1	3	1	4	1	1	1	1	1	1	1	1	2	1	1 MP	1	2	0	0
7545	22	1	1	1	0	2	0	1	1	1	1	1	1	1	1	1	1 MP	1	3	0	0
7546	22	1	1	1	1	4	0	1	1	1	1	1	1	2	1	1	1 MP	1	3	0	0
7547	8	0	2	1	1	4	1	1	1	1	1	1	1	1	1	1	1 MP	1	3	0	0
7548	8	0	2	2	1	4	1	1	1	1	1	1	1	2	1	1	1 MP	1	3	1	0
7549	8	0	2	2	0	3	1	1	1	1	1	1	1	1	1	1	1 MP	1	3	0	0
7550	8	0	2	2	1	3	1	1	2	1	2	1	1	1	2	1	1 MP	1	3	0	0
7552	8	0	2	2	1	3	1	1	1	1	1	2	1	1	1	1	1 MP	1	3	3	0
7553	8	0	2	1	1	2	0	1	2	1	1	1	1	1	1	1	1 MP	1	3	0	0
7554	6	0	3	1	1	3	1	2	1	1	1	1	1	1	1	1	1 MP	1	3	0	0
7555	8	0	2	2	0	1		1	1	1	1	1	1	1	1	1	1 MP	1	2	3	0
7556	8	0	2	2	1	2	1	1	1	1	1	1	1	1	1	1	1 MP	1	4	0	0
7557	8	0	2	1	1	3	0	1	1	1	1	1	1	1	1	1	1 MP	1	3	0	0
7558	8	0	2	2	1	3	0	2	1	1	1	2	2	1	1	1	1 MP	1	4	10	1
7559	12	1	2	1	1	3		1	1	1	1	1	1	1	1	1	1 MP	1	5	0	0
7560	12	1	2	2	1	3	1	1	1	1	1	1	1	1	1	1	1 MP	1	3	0	0
7561	12	1	2	1	1	3		1	1	1	1	1	1	1	1	1	1 MP	1	3	7	0
7562	12	1	2	1	1	4	1	1	1	1	1	1	2	1	1	1	1 MP	1	3	0	0
7563	12	1	2	2	1	2	1	1	1	1	1	1	2	1	2	1	1 MP	1	3	4	0
7564	12	1	2	1	0	3	0	1	1	1	1	1	1	1	1	1	1 MP	2		2	0
7566	12	1	2	1	1	3	0	1	2	1	1	1	1	1	2	1	1 MP	1	3	3	0
7567	5	0	4	3	1	2	0	1	1	1	1	1	1	1	1	1	1 MP	1	3	1	0
7568	5	0	4	1	1	3	1	1	1	1	1	1	1	2	1	1	1 MP	1	2	1	0
7569	5	0	4	3	1	3	1	1	2	1	1	2	1	1	2	1	1 MP	1	1	1	0
7571	5	0	4	1	1	4	1	1	1	1	1	1	2	1	1	1	1 MP	1	2	1	0
7572	5	0	4	1	1	3	1	1	2	1	1	1	1	1	2	1	1 MP	1	2	0	0
7573	5	0	4	1	0	3	1	1	1	1	1	1	1	1	1	1	1 MP	1	2	0	0
7574	5	0	4	1	1	4	0	1	2	1	1	1	1	2	1	1	1 MP	1	2	12	1
7576	5	0	4	1	1	3	1	1	1	1	1	1	1	1	1	1	1 MP	1	3	7	0
7577	5	0	4	1	1	3	0	2	1	2	1	1	1	1	1	1	1 MP	1	2	0	0
7578	5	0	4	2	1	4	0	1	1	1	1	1	1	1	2	1	1 MP	1	2	0	0
7579	6	1	4	1	1	4	1	1	1	1	1	1	1	1	1	1	1 MP	1	3	0	0
7580	6	1	4	1	1	4	1	1	1	1	1	1	1	1	2	1	1 MP	1	3	0	0
7581	6	1	4	1	1	3	0	1	1	1	1	1	1	1	1	1	1 MP	1	3	0	0
7582	5	0	4	1	0	3	0	1	2	1	1	1	1	1	1	1	1 MP	1	3	1	0
7583	6	1	4	1	1	4	1	1	1	1	1	1	1	1	2	1	1 MP	1	3	0	0
7584	6	1	4	1	1	3	1	1	1	1	1	1	1	1	1	1	1 MP	1	3	0	0
7585	6	1	4	1	1	3	0	1	1	1	1	1	2	1	1	1	1 MP	1	4	0	0
7587	6	1	4	1	1	3	1	1	1	2	1	1	1	1	1	1	1 MP	1	3	2	0
7588	6	1	4	1	1	4	0	1	1	1	1	1	1	1	1	1	1 MP	1	3	0	0
7589	6	1	4	2	1	3	1	2	1	1	1	1	1	1	2	1	1 MP	1	4	2	0
7593	11	0	1	1	1	3	1	1	2	1	1	1	1	1	1	1	1 MP	1	5	0	0
7594	11	0	1	2	1	4	1	1	1	1	1	1	1	1	2	2	1 MP	1	3	8	1
7595	11	0	1	2	1	3	0	1	1	1	1	1	2	1	2	1	1 MP	1	2	4	0
7596	11	0	1	2	1	3	0	1	1	1	1	1	1	1	1	2	1 MP	1	2	0	0
7597	11	0	1	1	1	4	0	1	1	1	1	1	2	1	1	1	1 MP	1	4
7598	22	1	1	2	0	3	0	1	1	1	1	1	1	1	1	1	1 MP	1	4	27	1
7599	22	1	1	3	1	4	0	1	1	1	1	1	1	2	1	1	1 MP	2		0	0
7600	22	1	1	1	1	4	0	1	1	1	1	1	1	1	1	1	1 MP	1	5	0	0
7602	22	1	1	2	1	3	0	1	1	1	1	1	1	2	1	1	1 MP	1	3	4	0
7603	8	0	2	2	1	4	0	1	1	1	1	1	1	2	2	1	1 MP	1	4	0	0
7605	12	1	2	2	1	3	1	1	1	1	1	2	1	1	1	1	1 MP	1	3	4	0
7607	12	1	2	1	0	4	0	2	1	1	1	1	1	1	1	1	1 MP	1	4	7	0
7609	12	1	2	2	1	3	1	2	2	1	1	1	2	1	1	1	1 MP	1	3	7	0
7610	6	0	3	2	1	3	0	1	1	1	1	1	1	1	1	1	1 MP	1	3	0	0
7611	6	0	3	1	0	4	1	2	1	1	1	1	1	1	1	1	1 MP	1	2	3	0
7612	6	0	3	2	0	3	1	1	1	1	1	1	1	1	2	1	1 MP	1	1	1	0
7613	6	0	3	1	1	3	1	1	1	1	1	1	1	1	1	1	1 MP	1	4	1	0
7614	8	1	3	3	1	4	1	1	1	1	1	1	1	2	2	1	1 MP	1	3	1	0
7615	8	1	3	1	1	2	0	1	1	1	1	2	2	1	2	2	1 MP	1	3	0	0
7616	8	1	3	1	1	4	0	1	1	1	1	1	1	2	2	1	1 MP	1	4	3	0
7617	8	1	3	1	1	3	0	1	1	1	1	1	1	2	2	1	1 MP	1	3	0	0
7618	8	1	3	2	1	3	0	1	1	1	1	1	1	1	1	1	1 MP	1	3	0	0
7619	8	1	3	1	1	2	0	1	1	1	1	1	1	2	1	1	1 MP	1	5	0	0
7620	5	0	4	2	0	3	0	2	1	1	1	1	1	2	2	1	1 MP	1	4	10	1
7624	6	1	4	1	1	3	0	1	1	1	1	1	1	1	1	1	1 MP	1	3	0	0
7625	6	1	4	1	1	3	1	1	1	1	1	1	1	1	1	1	1 MP	2		1	0
7627	11	0	1	2	1	4	1	1	1	1	1	1	1	2	2	2	1 MP	1	3	0	0
7629	11	0	1	1	1	3	1	1	1	2	1	1	1	1	1	1	1 MP	1	4	0	0
7630	22	1	1	1	1	4	1	1	1	1	1	1	2	1	2	1	1 MP	1	3	0	0
7633	22	1	1	2	1	4	1	1	1	1	1	1	1	2	1		1 MP	1	3	0	0
7634	22	1	1	2	1	4	0	1	1	1	1	1	1	2	1	1	1 MP	1	3	0	0
7635	22	1	1	2	0	4	1	2	2	1	1	1	2	1	1	1	1 MP	1	3	0	0
7636	8	0	2	1	1	3	0	1	1	1	1	1	1	1	1	1	1 MP	1	1	1	0
7637	12	1	2	1	1	4	0	1	1	1	1	1	2	1	1	1	1 MP	1	3	0	0
7638	12	1	2	1	1	2	1	1	1	1	1	1	1	1	2	1	1 MP	1	4	0	0
7639	12	1	2	1	1	3	0	1	1	1	1	1	1	1	1	1	1 MP	1	4	0	0
7640	22	1	1	1	1	4	1	1	1	1	1	1	1	1	2	1	1 MP	1	3	0	0
7641	12	1	2	2	1	3	0	1	1	1	1	1	2	1	2	1	1 MP	1	3	0	0
7642	12	1	2	3	1	3	1	1	1	1	1	1	1	2	1	1	1 MP	1	3	0	0
7643	12	1	2	1	1	3	1	1	1	1	1	1	1	1	2	1	1 MP	1	5	0	0
7644	12	1	2	1	1	2	0	1	1	1	1	1	1	1	1	1	1 MP	1	3	0	0
7645	12	1	2	1	0	3	0	2	1	1	1	1	2	1	1	1	1 MP	1	3	0	0
7646	12	1	2	2	0	3	0	2	1	1	1	1	2	1	1	1	1 MP	1	3	3	0
7647	6	0	3	1	1	3	1	1	1	1	1	1	1	1	1	1	1 MP	1	2	0	0
7648	6	0	3	2	1	4	0	1	1	1	1	1	1	1	1	1	1 MP	1	3	0	0
7649	6	0	3	1	0	3	1	1	1	1	1	1	1	2	1	1	1 MP	1	4	0	0
7650	6	0	3	1	0	2	1	1	1	1	2	1	1	2	1	1	1 MP	1	3	9	1
7651	6	0	3	1	1	2	1	1	1	1	1	2	2	1	1	1	1 MP	1	3	16	1
7652	6	0	3	2	1	1	0	1	1	1	1	1	1	1	1	1	1 MP	1	3	0	0
7653	6	0	3	1	0	2	0	1	1	1	1	1	1	1	1	1	1 MP	1	4	1	0
7654	6	0	3	2	1	4	0	1	1	1	1	1	1	1	1	1	1 MP	1	3	0	0
7655	6	0	3	1	1	3	1										1 MP	1	3	0	0
7656	6	0	3	1	1	4	0	1	1	1	1	1	2	1	1	1	1 MP	1	3	0	0
7658	8	1	3	2	1	3	0	1	1	1	1	1	1	1	1	1	1 MP	1	4	0	0
7659	8	1	3	1	1	3	0	1	1	1	1	1	1	1	1	1	1 MP	1	4	0	0
7660	8	1	3	1	1	4	0	1	1	1	1	1	1	1	1	1	1 MP	1	4	0	0
7661	8	1	3	1	1	4	0	1	1	1	1	1	1	1	2	1	1 MP	1	2	0	0
7662	8	1	3	1	1	4	0	1	1	1	1	1	1	2	2	1	1 MP	1	2	3	0
7663	8	1	3	1	1	4	1	1	1	1	1	1	2	1	2	1	1 MP	1	2	0	0
7664	8	1	3	1	0	5	0	1	1	1	1	1	1	1	1	1	1 MP	1	3	0	0
7665	8	1	3	3	1	3	0	1	1	1	1	1	1	1	1	1	1 MP	1	5	0	0
7666	12	1	2	2	1	4	0	1	1	1	1	1	1	1	1	1	1 MP	1	3	0	0
7667	12	1	2	1	1	4	1	1	1	1	2	1	1	2	2	1	1 MP	1	3	0	0
7668	22	1	1	2	1	3	1	1	1	1	1	1	1	1	1	1	1 MP	1	3	0	0
7669	22	1	1	2	0	1	1	1	1	1	1	1	1	1	1	1	1 MP	1	4	0	0
7670	8	1	3	2	1	3	0	1	1	1	2	1	1	1	1	1	1 MP	1	3	0	0
7671	8	1	3	1	0	4	0	1	1	1	1	1	1	1	1	1	1 MP	1	3	0	0
7672	5	0	4	1	1	4	0	1	1	1	1	1	1	1	1	1	1 MP	1	2	0	0
7673	5	0	4	1	1	2	0	1	1	1	1	1	1	1	1	1	1 MP	1	3	11	1
7674	5	0	4	1	0	4	0	1	1	1	1	1	1	1	1	1	1 MP	1	3	7	0
7675	5	0	4	2	1	3	1	1	1	1	1	1	1	1	1	1	1 MP	1	1	0	0
7676	5	0	4	1	1	4	0	1	1	1	1	1	1	1	2	1	1 MP	1	3	1	0
7677	5	0	4	1	1	4	0	1	1	1	1	1	1	1	1	1	1 MP	1	3	0	0
7678	5	0	4	2	1	4	1	1	2	1	1	1	1	1	1	1	1 MP	1	2	0	0
7679	5	0	4	1	1	3	1	1	1	1	1	1	1	1	1	1	1 MP	1	3	0	0
7680	5	0	4	2	1	3	1	2	1	1	1	1	1	1	2	1	1 MP	1	4	0	0
7688	6	1	4	2	1	4	0	2	1	1	1	2	2	1	1	1	1 MP	2		0	0
7689	6	1	4	2	1	3	1	1	1	1	1	2	2	1	2	1	1 MP	1	4	0	0
7690	6	1	4	1	1	3	1	1	1	1	2	1	1	1	1	1	1 MP	1	2	0	0
7691	6	1	4	1	1	4	1	1	1	1	1	1	1	1	1	1	1 MP	1	3	1	0
7692	6	1	4	1	1	3	1	1	1	2	1	1	1	1	1	1	1 MP	1	4	0	0
7693	6	1	4	1	0	3	1	1	1	1	1	1	1	1	1	1	1 MP	1	3	0	0
7694	6	1	4	1	1	3	1	2	1	1	1	1	1	1	1	1	1 MP	1	3	0	0
7695	6	1	4	2	1	4	1	1	1	1	1	2	1	2	1	1	1 MP	1	3	0	0
7696	6	1	4	1	0	3	1	1	1	1	1	1	1	1	1	1	1 MP	2		0	0
7697	6	0	3	1	1	4	0	1	1	2	1	1	1	1	1	1	1 MP	1	3	1	0
7698	6	0	3	1	1	3	1	1	1	1	1	1	1	1	1	1	1 MP	1	3	0	0
7699	12	1	2	1	1	3	1	1	1	1	1	1	1	1	1	1	1 MP	1	3	0	0
7700	8	1	3	2	1	3	1	1	2	1	1	1	1	1	1	1	1 MP	2		0	0
7701	11	0	1	2	0	3	1	1	2	1	1	1	1	1	1	1	1 MP	1	4	0	0
7702	8	1	3	1	1	3	1	1	1	1	1	1	1	1	1	1	1 MP	1	3	0	0
7703	12	1	2	2	1	3	0	1	1	1	2	1	2	1	1	1	1 MP	1	3	0	0
7704	6	0	3	2	0	3	1	1	1	1	1	1	1	1	1	1	1 MP	1	3	0	0
7705	6	0	3	1	1	3	1	1	1	1	1	1	1	1	1	1	1 MP	1	2	7	0
7706	8	0	2	3	1	3	1	1	2	1	1	1	1	1	1	1	1 MP	1	3	0	0
7707	5	0	4	1	0	2	1	2	1	1	1	1	1	1	2	1	1 MP	1	2	6	0
7708	8	0	2	3	1	3	0	1	1	1	1	1	1	1	1	1	1 MP	1	4	0	0
7709	22	1	1	2	1	3	0	1	1	1	1	1	1	1	2	1	1 MP	1	4	2	0
7711	8	1	3	2	1	3	1	1	1	1	1	1	2	1	1	1	1 MP	1	3	0	0
7712	8	0	2	2	1	2	1	1	1	1	1	2	2	1	2	1	1 MP	1	3	0	0
7713	8	0	2	2	1	3	1	1	2	1	1	1	1	1	2	1	1 MP	1	3	0	0
7715	11	0	1	2	1	3	1	1	1	1	1	1	2	1	1	1	1 MP	1	3	0	0
7716	8	0	2	2	0	3	1	1	1	1	1	1	2	2	2	1	1 MP	1	3	0	0
7717	8	0	2	1	1	3	1	1	1	1	1	1	2	1	2	1	1 MP	1	3	0	0
7718	11	0	1	1	0	3	0	1	1	1	1	1	1	1	1	1	1 MP	1	2	0	0
7719	11	0	1	3	1	4	1	1	1	1	1	1	1	1	1	1	1 MP	1	3	0	0
7720	22	1	1	2	1	3	1	1	1	1	1	1	1	1	2	1	1 MP	1	3	0	0
7721	11	0	1	2	1	2	1	2	1	1	1	1	2	1	1	1	1 MP	1	3	0	0
7722	8	1	3	1	1	3	1	1	1	1	1	1	1	1	1	1	1 MP	1	3	5	0
7723	11	0	1	2	1	4	0	1	1	1	1	1	1	1	1	1	1 MP	1	3	0	0
7725	22	1	1	2	1	4	0	1	1	1	1	1	1	2	1	1	1 MP	1	3	0	0
7726	6	0	3	1	1	3	1	1	1	1	1	2	2	1	1	1	1 MP	1	3	0	0
7727	6	0	3	2	1	3	1	1	1	1	1	1	1	1	1	1	1 MP	1	3	0	0
7728	8	0	2	1	1	3	1	1	1	1	1	1	1	2	1	1	1 MP	1	2	0	0
7729	12	1	2	1	1	3	1	1	2	1	1	1	1	2	1	1	1 MP	1	3	0	0
7730	8	0	2	2	0	4	1	1	1	1	1	1	1	1	1	1	1 MP	1	3	0	0
7731	8	0	2	2	1	3	0	1	1	1	1	1	1	1	2	1	1 MP	1	3	0	0
7732	11	0	1	2	1	3	0	1	2	1	1	1	2	1	1	1	1 MP	1	3	0	0
7733	8	0	2	1	0	4	1	1	1	1	1	1	1	1	1	1	1 MP	1	3	0	0
7734	6	0	3	1	0	3	1	1	2	1	1	1	1	1	1	1	1 MP	1	3	0	0
7735	8	0	2	1	0	2	0	2	1	1	1	2	1	2	2	2	1 MP	1	3	0	0
7736	6	0	3	1	1	4	0	1	1	1	1	1	1	1	1	1	1 MP	1	3	0	0
7737	12	1	2	1	1	4	0	1	2	1	1	1	1	1	1	1	1 MP	1	3	0	0
7738	11	0	1	3	1	3	1	1	1	1	1	1	1	1	1	1	1 MP	1	3	0	0
7739	8	0	2	2	1	2	1	1	1	1	1	1	2	1	1	1	1 MP	1	3	0	0
7740	8	0	2	2	0	4	0	1	2	1	1	1	1	1	2	1	1 MP	1	3	0	0
7741	8	0	2	2	0	3	1	1	1	1	1	1	1	1	1	1	1 MP	1	3	0	0
7743	8	1	3	2	1	4	0	1	2	1	1	1	1	1	1	1	1 MP	1	3	0	0
7744	6	0	3	1	1	4	1	1	1	1	1	1	1	1	1	1	1 MP	1	3	0	0
7745	8	0	2	1	0	4	0	1	2	1	1	1	1	1	1	1	1 MP	1	3	0	0
7746	11	0	1	1	0	4	0	1	1	1	1	1	1	2	1	1	1 MP	1	3	0	0
7747	11	0	1	1	1	4	0	1	2	1	1	1	2	2	2	1	1 MP	1	3	0	0
7749	11	0	1	1	1	3	1	1	1	2	1	1	1	1	1	1	1 MP	1	3	0	0
7750	12	1	2	1	1	3	1	1	1	1	1	1	1	1	1	1	1 MP	1	3	0	0
7751	8	0	2	1	1	3	1	1	1	1	1	1	1	1	1	1	1 MP	1	2	0	0
7752	11	0	1	2	1	3	1	1	1	1	1	1	1	1	1	1	1 MP	1	3	0	0
7753	22	1	1	2	1	3	0	1	1	1	1	1	1	1	1	1	1 MP	1	3	0	0
7754	5	0	4	1	0	3	1	1	1	2	1	1	1	1	1	1	1 MP	1	3	0	0
7755	5	0	4	1	1	3	1	1	1	1	1	1	1	2	2	1	1 MP	1	3	3	0
7756	8	0	2	1	1	4	0	1	1	1	1	1	1	1	1	1	1 MP	1	3	0	0
7757	12	1	2	1	1	2	1	1	1	1	1	1	1	1	2	1	1 MP	1	3	0	0
7758	8	0	2	1	1	3	0	1	1	1	1	1	1	1	1	1	1 MP	1	3	0	0
7759	8	1	3	1	1	4	0	1	1	1	1	1	1	1	1	1	1 MP	1	3	0	0
7760	11	0	1	3	1	3	1	1	1	1	1	1	1	1	2	1	1 MP	1	3	0	0
7761	6	0	3	2	1	4	1	1	1	1	1	1	1	1	1	1	1 MP	1	3	0	0
7762	11	0	1	2	1	4	0	1	1	1	1	1	1	2	1	1	1 MP	1	3	0	0
7763	6	0	3	2	1	3	1	1	1	1	1	1	1	1	2	1	1 MP	1	3	0	0
7764	11	0	1	2	0	3	1	1	1	1	1	1	1	2	1	1	1 MP	1	3	0	0
7765	11	0	1	2	1	3	1	1	1	1	1	1	2	1	1	1	1 MP	1	3	0	0
7767	8	0	2	1	1	3	1	1	1	1	1	1	1	1	2	1	1 MP	1	3	0	0
7768	22	1	1	2	1	4	1	1	2	1	1	2	1	2	1	2	1 MP	1	3	0	0
7769	11	0	1	2	1	4	1	1	2	1	1	1	1	1	1	1	1 MP	1	3	0	0
7771	8	0	2	2	1	4	0	1	1	1	1	1	1	2	1	1	1 MP	1	3	0	0
7772	12	1	2	1	1	4	0	1	1	1	1	1	1	2	1	1	1 MP	1	3	0	0
7773	8	0	2	2	1	4	0	2	2	1	1	1	1	1	2	1	1 MP	1	3	0	0
7774	6	0	3	1	1	3	0	1	2	1	1	1	1	1	1	1	1 MP	1	3	0	0
7775	6	0	3	1	0	4	1	1	1	1	1	1	2		2	1	1 MP	1	4	0	0
7776	11	0	1	2	1	4	0	1	1	1	1	1	1	1	1	1	1 MP	1	3	0	0
7777	8	0	2	1	1	4	1	1	2	1	1	1	1	1	1	1	1 MP	1	3	0	0
7778	11	0	1	2	1	1	0	1	2	1	1	1	1	1	1	1	1 MP	1	3	2	0
7779	12	1	2	1	1	2	0	1	1	1	1	1	1	1	2	1	1 MP	1	4	0	0
7780	12	1	2	2	1	4	0	1	1	1	1	1	1	2	1	1	1 MP	1	3	0	0
7781	6	0	3	1	1	3	1	1	1	1	1	1	1	1	1	1	1 MP	1	3	2	0
7782	11	0	1	2	1	4	0	1	1	1	1	1	1	1	1	1	1 MP	1	3	2	0
7783	8	0	2	3	1	3	0	1	1	1	1	1	1	1	1	1	1 MP	1	3	0	0
7784	8	0	2	1	0	3	0	1	2	1	1	1	1	1	1	1	1 MP	1	3	2	0
7785	6	0	3	1	1	4	0	1	1	1	1	1	1	1	1	1	1 MP	1	4	0	0
7786	6	0	3	1	1	5	0	1	1	1	1	1	2	2	2	1	1 MP	1	4	0	0
7787	12	1	2	1	1	5	1	1	1	1	1	1	1	1	2	1	1 MP	1	3	0	0
7788	8	1	3	3	1	3	1	1	1	1	1	1	1	1	2	1	1 MP	1	4	0	0
7789	11	0	1	2	0	4	1	1	1	1	1	1	1	1	2	1	1 MP	2		1	0
7790	6	1	4	1	0	3	0	1	1	1	1	1	1	1	1	1	1 MP	1	3	8	1
7791	5	0	4	1	0	3	0	1	1	1	1	1	1	1	1	1	1 MP	2		4	0
7792	11	0	1	2	1	3	1	1	1	1	1	1	1	1	1	1	1 MP	1	3	0	0
7793	8	1	3	1	1	4	1	1	1	1	1	1	1	2	2	1	1 MP	1	3	0	0
7794	12	1	2	2	1	3	1	1	1	1	1	1	1	1	1	1	1 MP	1	3	0	0
7795	11	0	1	2	1	3	1	1	1	1	1	1	1	1	2	1	1 MP	1	3	0	0
7796	6	0	3	1	1	3	0	1	2	1	1	1	1	1	1	1	1 MP	1	3	3	0
7797	8	0	2	2	1	4	0	1	1	1	1	1	1	1	1	1	1 MP	1	3	0	0
7798	6	0	3	1	0	3		1	1	1	1	1	1	1	2	1	1 MP	1	3	0	0
7799	8	1	3	1	1	3	1	1	1	1	1	1	1	1	1	1	1 MP	1	3	0	0
7800	8	0	2	1	1	4	1	1	1	1	1	1	1	1	1	1	1 MP	1	3	0	0
7801	6	0	3	2	0	3	0	1	1	2	1	1	1	2	1	1	1 MP	1	4	0	0
7802	8	0	2	1	1	3	1	1	1	1	1	1	2	1	1	1	1 MP	1	3	0	0
7803	8	1	3	2	1	1	1	1	1	1	1	1	1	1	1	1	1 MP	1	4	0	0
7804	6	0	3	1	1	3	1	2	1	1	1	1	2	1	1	1	1 MP	1	3	0	0
7805	11	0	1	1	1	5	1	1	2	1	1	2	2	1	2	1	1 MP	1	4	0	0
7806	8	0	2	1	1	3	0	1	1	1	1	1	1	1	1	1	1 MP	1	3	1	0
7807	8	1	3	1	0	3	0	1	1	1	1	1	2	1	1	1	1 MP	1	4	0	0
7808	8	0	2	2	0	3	1	1	1	1	1	1	1	1	1	1	1 MP	1	3	0	0
7809	8	1	3	3	1	3	1	1	1	1	1	1	1	1	1	1	1 MP	1	3	0	0
7810	8	0	2	3	0	3	1	1	1	1	1	1	1	1	1	1	1 MP	1	3	0	0
7811	12	1	2	1	1	3	1	1	1	1	1	1	1	2	2	1	1 MP	1	5	0	0
7813	8	0	2	2	0	4	0	1	1	1	1	1	1	1	2	1	1 MP	1	3	0	0
7814	11	0	1	2	1	3	1	1	1	1	1	1	1	1	1	1	1 MP	1	3	0	0
7815	11	0	1	2	1	1	1	1	1	1	1	1	1	1	2	1	1 MP	1	2	0	0
7816	12	1	2	1	1	4	0									2	1 MP	1	4	0	0
7817	22	1	1	2	1	3	0	1	1	1	1	1	1	1	1	1	1 MP	1	3	1	0
7818	11	0	1	2	0	2	1	2	1	1	1	1	2	1	1	1	1 MP	1	3	2	0
7819	12	1	2	1	1	2	1	1	1	1	1	1	1	1	1	1	1 MP	1	3	1	0
7820	22	1	1	3	1	3	0	1	1	1	1	1	1	1	1	1	1 MP	1	3	0	0
7821	11	0	1	1	0	2	1	1	1	1	1	1	1	1	2	1	1 MP	1	3	0	0
7822	6	1	4	1	1	4	1	1	1	1	1	1	1	2	1	1	1 MP	1	3	0	0
7824	8	0	2	2	0	3	1	1	1	1	1	1	1	1	1	1	1 MP	1	3	0	0
7825	8	1	3	2	1	3	1	1	1	1	1	1	1	1	1	1	1 MP	1	4	0	0
7826	8	0	2	1	1	1	1	1	1	1	1	1	1	1	1	1	1 MP	1	3	0	0
7827	11	0	1	2	0	4	0	1	1	1	2	1	1	2	1	1	1 MP	1	3	0	0
7828	22	1	1	2	1	3	1	1	1	1	1	1	1	1	2	1	1 MP	1	3	0	0
7829	11	0	1	2	1	2	0	1	1	1	2	1	1	1	1	1	1 MP	1	2	0	0
7830	12	1	2	2	1	4	0	1	1	1	1	1	1	1	1	1	1 MP	1	3	0	0
7831	8	0	2	2	1	3	1	1	1	1	1	1	1	1	1	1	1 MP	1	3	0	0
7832	8	0	2	1	1	4	0	1	1	1	2	1	1	1	1	1	1 MP	1	4	0	0
7835	11	0	1	2	1	1	1	1	1	2	1	1	1	1	1	1	1 MP	1	3	0	0
7836	11	0	1	2	1	3	1	1	1	1	2	1	1	1	1	1	1 MP	1	3	0	0
7837	11	0	1	1	1	3	0	1	1	1	1	1	1	2	1	1	1 MP	1	3	0	0
7838	12	1	2	2	1	2	0	1	1	1	1	2	1	1	1	1	1 MP	1	3	0	0
7839	8	0	2	1	1	2	1	1	1	1	1	1	1	1	1	1	1 MP	1	3	0	0
7840	12	1	2	1	1	2	1	1	1	1	1	1	1	1	1	1	1 MP	1	4	0	0
7841	6	0	3	1	0	3	1	1	1	1	1	1	1	1	2	1	1 MP	1	5	6	0
7842	12	1	2	2	1	3	0	1	1	1	1	1	1	1	2	1	1 MP	1	2	0	0
7843	8	0	2	2	1	2	1	1	1	1	1	1	2	1	1	1	1 MP	1	3	0	0
7844	6	0	3	1	1	3	1	1	1	1	1	1	1	1	2	1	1 MP	1	3	0	0
7845	8	0	2	1	0	3	0	2	2	1	1	1	2	1	2	1	1 MP	1	5	8	1
7846	8	1	3	1	1	4	1	1	1	1	2	1	2	1	1	1	1 MP	1	4	0	0
7847	6	0	3	1	0	2	0	1	1	1	1	1	1	1	1	1	1 MP	1	4	0	0
7848	6	0	3	1	1	2	1	1	1	1	1	1	1	1	1	1	1 MP	1	3	0	0
7849	8	0	2	1	1	3	1	1	1	1	1	1	1	1	1	1	1 MP	1	4	0	0
7850	22	1	1	1	1	2	1	1	1		1	1	1	1	1	1	1 MP	1	4	2	0
7851	11	0	1	2	1	2	1	1	1	1	1	1	1	1	1	1	1 MP	1	3	0	0
7852	11	0	1	2	1	3	1	1	1	1	2	1	2	2	2	1	1 MP	1	3	0	0
7853	6	0	3	3	1	2	0	1	1	1		1	1	1	1	1	1 MP	1	3	0	0
7854	11	0	1	2	1	4	1	1	1	2	1	1	1	1	1	1	1 MP	1	3	0	0
7855	8	0	2	1	1	5	0	1	1	1	1	1	2	1	1	1	1 MP	1	3	0	0
7856	6	0	3	3	1	2	1	1	1	1	1	1	1	1	1	1	1 MP	1	2	0	0
7857	11	0	1	2	0	3	0	1	1	1	1	1	1	1	1	1	1 MP	1	3	0	0
7858	8	0	2	1	0	2	1	1	1	1	1	1	1	1	2	1	1 MP	1	2	8	1
7859	8	0	2	2	1	4	0	1	2	1	2	1	1	1	1	1	1 MP	1	3	0	0
7860	11	0	1	3	0	4	1	2	2	1	1	1	1	1	1	1	1 MP	1	3	0	0
7861	11	0	1	1	0	2	1	1	1	1	1	2	1	1	1	1	1 MP	1	4	0	0
7862	8	0	1	1	1	4	0	1	1	1	1	1	1	1	1	1	1 MP	1	3	0	0
7863	22	1	1	2	1	3	1	1	1	1	1	1	2	1	1	1	1 MP	1	3	0	0
7864	6	0	3	1	1	3	1	1	1	1	1	1	1	1	2	1	1 MP	1	3	2	0
7865	8	1	3	2	1	3	0	1	1	1	1	1	1	1	1	1	1 MP	1	3	1	0
7866	6	0	3	1	1	3	1	1	1	1	1	1	1	1	1	1	1 MP	1	4	0	0
7867	11	0	1	3	0	3	1	2	1	1	1	1	1	1	1	1	1 MP	1	3	0	0
7868	8	0	2	2	1	2	1	1	1	1	1	1	1	1	1	1	1 MP	1	3	3	0
7869	8	0	2	1	1	2	1	1	1	1	1	1	1	1	1	1	1 MP	1	3	0	0
7871	8	1	3	1	1	3	1	1	1	1	1	1	1	2	1	1	1 MP	1	3	0	0
7872	11	0	1	1	1	4	0	2	2	1	1	2	2	1	2	1	1 MP	1	4	1	0
7873	6	0	3	1	1	3	1	1	1	1	1	2	1	1	1	1	1 MP	1	4	0	0
7874	8	0	2	2	1	3	1	1	1	2	1	1	1	1	1	1	1 MP	1	2	0	0
7875	8	0	2	2	0	3	1	1	2	1	1	1	1	2	1	1	1 MP	2		0	0
7876	6	0	3	1	1	2	1	1	1	1	1	1	1	1	2	1	1 MP	1	3	4	0
7877	8	0	2	1	1	3	1	1	1	1	1	1	1	2	2	1	1 MP	1	3	0	0
7878	12	1	2	1	1	2	1	1	1	1	1	1	1	1	1	1	1 MP	1	4	0	0
7879	12	1	2	2	1	1	1	1	1	1	1	1	1	1	1	1	1 MP	1	3	0	0
7880	8	1	3	1	1	3	0	1	1	1	1	1	1	1	1	1	1 MP	1	4	0	0
7882	12	1	2	1	1	3	1	1	1	1	1	1	1	1	1	1	1 MP	1	3	0	0
7883	12	1	2	1	1	1	0	1	2	1	1	1	1	1	1	1	1 MP	1	3	0	0
7884	6	0	3	1	1	2	1	1	2	1	1	2	2	1	2	1	1 MP	1	3	0	0
7885	11	0	1	1	1	3	1	1	1	1	1	1	1	2	1	1	1 MP	1	3	0	0
7886	11	0	1	2	0	4	0	1	1	1	1	1	1	1	2	1	1 MP	1	2	12	1
7887	6	0	3	2	1	4	1	1	1	2	1	1	1	1	1	1	1 MP	1	3	10	1
7888	6	0	3	1	0	3	1	1	1	1	1	1	2	1	2	1	1 MP	1	3	0	0
7889	6	1	4	1	1	3	1	1	1	1	1	1	1	2	1	1	1 MP	1	3	0	0
7890	8	0	2	1	1	3	1	1	1	1	1	1	1	1	1	1	1 MP	1	3	0	0
7891	8	1	3	1	1	3	1	1	1	1	1	1	1	1	1	1	1 MP	1	3	0	0
7892	11	0	1	2	0	3	0	1	1	1	1	1	1	1	2	1	1 MP	1	3	0	0
7893	12	1	2	1	1	3	1	1	1	1	1	1	1	1	1	1	1 MP	1	3	2	0
7894	8	1	3	1	0	3	0	1	1	1	1	1	1	1	2	1	1 MP	1	3	0	0
7896	22	1	1	3	1	3	1	1	1	2	1	2	2	1	2	1	1 MP	1	5	0	0
7897	6	0	3	1	1	3	1	1	1	1	1	1	1	2	1	1	1 MP	1	3	0	0
7898	8	1	3	1	0	4	1	1	1	1	1	1	1	2	1	1	1 MP	1	3	0	0
7899	6	0	3	1	1	4	1	1	1	1	1	1	1	1	1	1	1 MP	1	3	0	0
7900	6	1	4	1	1	3	1	1	1	1	1	1	1	1	1	1	1 MP	1	3	0	0
7901	6	0	3	1	1	2	1	2	1	1	1	1	2	1	1	1	1 MP	1	3	0	0
7902	11	0	1	1	0	4	0	1	1	1	1	1	1	1	2	1	1 MP	1	3	0	0
7903	11	0	1	2	1	3	0	1	2	1	2	2	1	2	1	1	1 MP	1	3	7	0
7904	22	1	1	1	1	3	1	1	1	1	1	1	1	1	1	1	1 MP	1	5	0	0
7905	8	0	1	1	1	3	0	1	1	1	1	1	1	1	1	1	1 MP	1	3	0	0
7906	11	0	1	1	1	3	1	1	1	1	1	1	1	1	1	1	1 MP	1	3	0	0
7907	8	0	2	1	1	4	1	1	1	1	1	1	2	1	1	1	1 MP	1	3	0	0
7908	8	0	2	1	1	4	0	1	1	2	1	1	1	1	2	1	1 MP	1	3	0	0
7909	8	0	2	2	1	4	0	2	2	2	1	1	1	2	1	1	1 MP	1	3	0	0
7910	22	1	1	2	1	3	0	1	1	1	1	1	1	1	1	1	1 MP	1	3	0	0
7911	6	0	3	1	0	3	1	1	1	1	1	1	1	1	1	1	1 MP	1	4	1	0
7912	11	0	1	3	0	4	1	1	1	1	1	1	1	2	2	1	1 MP	1	3	0	0
7913	8	0	2	2	1	4	0	1	1	1	1	1	1	1	1	1	1 MP	1	3	0	0
7914	12	1	2	1	1	3	0	1	1	1	1	1	1	1	1	1	1 MP	1	3	0	0
7915	11	0	1	2	0	3	0	1	1	1	1	1	1	1	1	1	1 MP	1	3	0	0
7916	6	0	3	1	0	3	1	2	1	1	1	1	2	1	2	1	1 MP	1	3	0	0
7917	11	0	1	1	1	4	1	1	1	1	1	1	1	2	2	1	1 MP	1	3	0	0
7918	5	0	4	1	0	3	0	1	1	1	1	1	1	1	1	1	1 MP	1	3	0	0
7919	11	0	1	2	1	2	1	1	2	1	1	1	1	1	2	1	1 MP	1	4	0	0
7921	22	1	1	2	0	3	1	1	1	1	1	1	1	1	2	1	1 MP	1	4	3	0
7922	8	1	3	1	0	1	0	1	1	1	1	1	1	1	1	1	1 MP	2		0	0
7923	12	1	2	3	1	4		1	1	1	1	1	1	2	1	1	1 MP	1	3	8	1
7924	6	0	3	1	1	3	0	1	1	1	1	1	2	1	1	1	1 MP	1	5	6	0
7925	6	0	3	1	0	3	1	1	1	1	1	1	1	1	1	1	1 MP	1	3	7	0
7926	8	0	2	2	1	3	0	1	1	1	1	1	2	1	2	1	1 MP	1	5	0	0
7927	8	1	3	1	1	3	1	1	1	1	1	1	1	1	2	1	1 MP	1	3	0	0
7928	8	1	3	1	1	3	1	1	1	1	1	1	2	1	1	1	1 MP	1	3	0	0
7929	12	1	2	2	1	1	0	1	1	1	1	1	2	1	1	1	1 MP	1	4	0	0
7930	12	1	2	3	1	4	0	1	1	1	1	1	1	1	1	1	1 MP	1	3	0	0
7931	8	1	3	1	1	4	1	2	1	1	1	1	1	2	1	1	1 MP	1	4	0	0
7932	6	1	4	1	1	2	0	1	1	1	1	1	1	1	2	1	1 MP	1	3	0	0
7933	22	1	1	1	1	2	1	1	1	1	1	1	1	1	1	1	1 MP	1	3	0	0
7934	12	1	2	2	1	2	1	1	1	1	1	1	1	1	1	1	1 MP	1	4	0	0
7935	22	1	1	2	1	4	1	1	1	1	1	1	1	1	1	1	1 MP	1	4	0	0
7936	22	1	1	1	1	4	0	1	1	1	1	2	1	1	1	1	1 MP	1	4	0	0
7937	12	1	2	1	1	3	1	1	1	1	1	1	1	1	1	1	1 MP	1	3	0	0
7938	8	1	3	2	0	2	1	1	1	1	1	1	1	1	1	1	1 MP	1	3	0	0
7939	5	0	4	2	0	4	0	1	1	1	1	1	1	1	1	1	1 MP	1	2	2	0
7940	8	1	3	1	0	3	1	1	1	1	2	1	1	2	1	1	1 MP	1	3	0	0
7941	8	1	3	2	0	3	1	1	1	1	1	1	1	1	2	1	1 MP	1	3	0	0
7942	12	1	2	1	1	3	1	1	1	1	1	1	1	1	1	1	1 MP	1	4	0	0
7943	8	1	3	1	1	3	1	1	1	1	1	1	1	1	1	1	1 MP	1	5	0	0
7944	22	1	1	1	1	4	0	1	1	1	1	1	1	2	2	1	1 MP	1	3	0	0
7945	8	0	2	1	1	4	1										1 MP	1	2	0	0
7946	8	1	3	1	1	4	0	1	1	1	1	1	1	1	1	1	1 MP	1	3	0	0
7947	8	0	2	2	1	3	0	1	1	1	1	1	1	1	1	1	1 MP	1	2	0	0
7948	8	0	2	2	1	3	1	1	1	1	1	1	1	1	1	1	1 MP	1	2	0	0
7949	12	1	2	2	1	3	0	1	1	1	1	1	1	2	2	1	1 MP	1	4	0	0
7950	6	0	3	1	1	3	1	1	1	1	1	1	1	1	1	1	1 MP	1	4	0	0
7952	6	0	3	2	1	2	0	1	1	1	1	1	1	1	1	1	1 MP	2		0	0
7953	6	0	3	1	0	3	0	1	1	1	1	1	1	1	2	2	1 MP	1	3	0	0
7954	11	0	1	1	0	3	0	1	1	1	1	1	1	1	1	1	1 MP	1	4	0	0
7955	8	0	2	2	1	3	0	1	1	1	1	1	1	1	1	1	1 MP	1	3	0	0
7956	12	1	2	2	0	3	1	1	1	1	1	1	2	1	1	1	1 MP	1	4	0	0
7957	6	0	3	1	0	4	0	1	1	1	1	1	1	1	1	1	1 MP	1	3	0	0
7958	8	0	2	1	1	3	1	1	1	1	1	1	1	1	1	1	1 MP	1	2	5	0
7959	8	0	2	2	0	3	0	1	1	1	1	1	1	1	1	1	1 MP	1	4	3	0
7960	11	0	1	1	0	3	1	1	1	1	1	1	1	2	2	1	1 MP	1	4	0	0
7961	11	0	1	2	1	3	1	1	1	1	1	1	1	1	1	1	1 MP	1	3	0	0
7962	8	0	2	1	0	3	1	1	1	1	1	1	1	1	1	1	1 MP	1	2	1	0
7963	5	0	4	1	0	3	0	1	2	1	1	1	1	1	1	1	1 MP	1	4	0	0
7964	6	0	3	1	0	4	0	1	2	1	1	1	1	2	2	1	1 MP	1	4	0	0
7965	8	0	2	1	1	3	1	1	1	1	1	1	1	2	1	1	1 MP	1	4	0	0
7966	11	0	1	2	1	2	0	1	1	1	2	1	1	1	1	1	1 MP	1	3	0	0
7967	22	1	1	1	1	4	0	1	1	1	1	1	1	1	1	2	1 MP	1	4	0	0
7968	6	0	3	1	0	3	0	1	1	1	1	1	2	1	1	1	1 MP	1	4	0	0
7969	5	0	3	1	1	1	1	1	2	1	1	1	1	1	1	1	1 MP	1	3	0	0
7970	8	0	2	1	1	5	0	1	2	1	1	1	2	1	1	1	1 MP	1	3	0	0
9899	8	0	2	2	1	2	0	1	1	1	1	1	1	2	2	1	1 MP	1	3	0	0
9900	8	1	3	1	1	3	1	1	1	1	1	2	1	1	2	1	1 MP	1	3	4	0
9901	6	0	3	1	0	3	0	1	1	2	1	1	1	1	1	1	1 MP	1	3	0	0
9903	11	0	1	1	1	3	1	1	1	1	1	1	1	2	1	1	1 MP	1	2	0	0
9904	8	1	3	3	1	3	0	1	1	1	1	1	1	1	1	1	1 MP	1	4	0	0
9906	11	0	1	3	1	3	1	1	1	1	1	1	2	1	1	1	1 MP	1	1	2	0
9907	11	0	1	2	1	1	1	1	1	1	1	1	1	1	1	1	1 MP	1	3	3	0
9908	8	0	2	3	1	3	0	1	1	1	2	1	2	1	2	1	1 MP	1	4	3	0
9909	8	1	3	1	0	4	0	1	1	1	1	1	1	1	1	1	1 MP	1	3	2	0
9910	8	1	3	2	1	3	0	1	1	1	2	1	2	1	1	1	1 MP	1	3	0	0
9911	8	0	2	1	1	3	1	2	2	1	2	1	1	1	2	1	1 MP	1	3	0	0
9912	11	0	1	1	0	3	0	1	1	1	1	2	1	1	1	1	1 MP	1	3	5	0
9915	11	0	1	1	1	3	1	1	1	1	1	1	1	1	1	1	1 MP	1	3	0	0
9916	8	0	2	1	1	3	1	1	1	1	2	1	2	2	1	1	1 MP	1	3	1	0
9917	11	0	1	2	0	3	0	1	1	1	2	1	1	1	1	1	1 MP	1	3	0	0
9918	11	0	1	2	0	3	0	1	1	1	1	1	1	1	1	1	1 MP	1	3	0	0
9920	11	0	1	1	1	3	1	1	1	1	1	1	1	1	1	1	1 MP	1	3	0	0
9921	6	0	3	1	1	4	0	1	1	1	1	1	1	1	2	1	1 MP	1	3	1	0
9922	11	0	1	3	1	2	0	1	1	1	1	1	1	1	1	1	1 MP	1	4	2	0
9923	8	0	2	1	0	3	1	1	1	1	1	1	1	2	1	1	1 MP	1	3	4	0
9924	6	0	3	1	0	3	1	1	1	2	1	1	1	1	1	1	1 MP	1	3	4	0
9925	11	0	1	1	1	1	1	1	1	2	1	1	1	1	1	1	1 MP	1	3	7	0
9927	8	0	2	2	1	3	0	1	1	1	1	1	1	1	1	1	1 MP	1	3	0	0
9928	8	0	2	3	0	2	0	1	1	1	1	1	2	1	2	1	1 MP	1	3	0	0
9929	8	0	2	1	1	3	0	1	2	1	1	1	1	1	2	1	1 MP	1	3	0	0
9930	8	0	2	3	1	3	1	1	1	1	1	1	1	1	1		1 MP	1	2	0	0
9932	11	0	1	1	0	3	0	1	1	1	1	1	1	1	1	1	1 MP	1	3	0	0
9933	8	0	2	1	0	3	0	1	1	1	1	1	1	1	1	1	1 MP	1	5	22	1
9934	8	0	2	1	1	3	1	1	1	1	1	1	1	1	1	1	1 MP	1	2	2	0
9935	8	0	2	2		3	0	1	1	1	1	1	2	1	1	1	1 MP
9937	11	0	1	2	1	2	0	1	1	1	1	1	1	1	1	1	1 MP	1	4	0	0
9938	8	0	2	1	1	2	1	1	1	1	1	1	1	1	1	1	1 MP	1	4	0	0
9939	11	0	1	2	0	2	1	1	1	1	1	1	1	1	1	1	1 MP	1	3	0	0
9940	8	0	2	1	1	2	0	1	1	1	1	1	1	1	2	1	1 MP	1	4	0	0
9941	11	0	1	1	1	3	1	1	1	1	1	1	1	1	1	1	1 MP	1	3	0	0
9942	8	0	2	2	1	4	1	1	1	1	1	1	1	1	2	1	1 MP	1	3	0	0
9943	8	0	2	1	1	3	0	1	1	1	1	1	1	1	1	1	1 MP	1	4	0	0
9944	8	0	2	2	0	1	1	1	1	2	1	1	1	1	1	1	1 MP	1	4	3	0
9945	6	0	3	1	1	3	0	1	1	1	1	1	1	1	1	1	1 MP	2		0	0
9946	8	1	3	1	1	5	1	1	1	1	1	1	1	2	1	1	1 MP	1	3	0	0
9947	11	0	1	1	1	5	0	1	1	1	1	1	1	2	1	1	1 MP	1	3	0	0
9951	8	1	3	1	0	3	1	2	1	1	1	2	2	1	1	1	1 MP	1	3	1	0
9952	6	1	4	1	0	5	0	1	2	1	1	1	1	2	1	1	1 MP	1	2	1	0
9953	12	1	2	1	1	4	0	2	2	1	1	2	2	2	1	1	1 MP	1	3	0	0
9954	6	0	3	1	1	3	1	1	1	1	1	1	1	1	2	1	1 MP	1	2	0	0
9955	8	1	3	2	1	4	1	1	1	1	1	1	1	1	1	1	1 MP	1	4	18	1
9956	5	0	4	1	0	4	1	1	2	1	1	1	1	2	1	1	1 MP	1	3	0	0
9958	6	0	3	1	1	3	0	1	2	1	1	1	1	1	1	1	1 MP	1	2	3	0
9959	6	1	4	2	1	4	1	1	1	1	1	1	1	1	1	1	1 MP	1	3	4	0
9962	5	0	4	1	1	2	1	1	2	1	1	1	1	2	2	1	1 MP	1	3	0	0
9963	5	0	4	1	1	1	0	1	1	1	1	1	1	1	1	1	1 MP	1	3	2	0
9964	5	0	4	1	1	4	0	1	1	1	1	1	1	2	2	1	1 MP	1	2	0	0
9965	8	1	3	1	1	5	0	1	1	1	1	1	1	1	1	1	1 MP	1	3	0	0
9966	6	0	3	1	1	4	1	1	2	1	1	1	1	1	1	1	1 MP	1	2	0	0
9967	6	0	3	1	1	3	1	2	1	1	1	1	1	2	1	1	1 MP	1	2	3	0
9968	6	0	3	3	1	4	1	1	2	1	1	1	1	1	1	1	1 MP	1	3	0	0
9969	5	0	4	3	0	1	0	2	1	1	1	1	1	1	1	1	1 MP	1	3	3	0
9970	22	1	1	2	0	3	1	1	1	1	1	1	1	1	2	1	1 MP	1	4	0	0
9971	12	1	2	1	0	3	0	1	1	1	1	1	1	1	1	1	1 MP	1	3	0	0
9972	8	1	3	1	1	4	1	1	1	1	1	1	1	2	1	1	1 MP	1	3	0	0
9973	6	1	4	1	1	3	1	1	1	1	1	1	2	1	1	1	1 MP	1	3	0	0
9974	5	0	4	1	1	3	0	1	1	1	1	1	1	1	2	1	1 MP	1	3	0	0
9975	5	0	4	1	0	3	1	1	1	1	1	1	1	1	1	1	1 MP	1	3	8	1
9976	5	0	4	1	0	4	1	1	1	1	1	1	1	2	1	1	1 MP	1	2	5	0
9977	12	1	2	2	0	4	1	2	1	1	1	1	2	1	1	1	1 MP	1	4	0	0
9978	6	0	3	3	0	1	1	1	1	1	1	1	1	1	1	1	1 MP	1	2	0	0
9980	11	0	1	2	1	3	0	1	1	1	1	1	1	1	1	1	1 MP	1	4	0	0
9982	22	1	1	2	1	3	0	1	1	1	1	1	1	1	1	1	1 MP	1	4	0	0
9983	12	1	2	1	1	4	0	1	1	1	1	2	1	2	2	1	1 MP	1	4	0	0
9984	12	1	2	1	1	3	0	1	1	1	1	1	1	1	1	1	1 MP	1	4	0	0
9985	8	1	3	2	1	2	1	1	1	1	1	1	1	1	1	1	1 MP	1	3	0	0
9986	8	1	3	2	1	3	0	1	1	1	1	1	1	1	1	1	1 MP	1	2	3	0
9987	6	0	3	1	1	3	1	1	1	1	1	1	2	1	1	1	1 MP	1	5	0	0
9988	5	0	4	2	0	2	0	1	1	1	1	1	1	1	1	1	1 MP	1	3	0	0
9989	8	1	3	1	1	3	1	1	1	1	1	1	1	1	1	1	1 MP	1	4	0	0
9990	8	1	3	1	1	4	1	1	2	1	1	1	1	1	2	1	1 MP	1	4	0	0
9991	8	1	3	1	0	4	0	1	1	1	1	1	1	2	2	1	1 MP	1	4	0	0
9992	12	1	2	1	1	3	0	1	1	1	1	1	1	1	1	1	1 MP	1	3	1	0
9993	12	1	2	1	1	3	1	1	1	1	1	1	1	1	1	1	1 MP	1	4	0	0
9994	22	1	1	1	1	3	0	1	2	1	1	1	1	1	2	1	1 MP	2		0	0
9995	8	1	3	2	0	4	1	1	2	1	1	1	1	2	2	1	1 MP	2		0	0
9996	5	0	4	1	0	3	1	1	1	1	1	1	1	1	1	1	1 MP	1	4	3	0
9997	12	1	2	1	1	3	0	1	1	1	1	2	1	1	1	1	1 MP	1	2	0	0
9998	12	1	2	1	1	3	1	1	1	1	1	1	1	1	2	1	1 MP	1	5	0	0
9999	6	0	3	1	0	3	0	1	1	1	1	1	1	1	1	1	1 MP	1	3	2	0
10000	5	0	4	1	1	3	1	1	1	1	1	1	1	1	1	1	1 MP	1	3	0	0
10001	12	1	2	2	1	4	1	1	1	1	1	1	2	2	1	1	1 MP	1	3	0	0
10002	6	0	3	1	0	3	0	1	1	1	1	1	1	1	2	1	1 MP	1	3	0	0
10003	6	0	3	1	1	3	0	1	1	1	1	1	1	2	2	1	1 MP	1	3	5	0
10004	6	1	4	1	1	3	0	1	1	1	1	1	1	1	1	1	1 MP	1	2	0	0
10005	8	1	3	2	0	3	0	1	1	1	1	1	2	1	1	1	1 MP	1	4	4	0
10006	5	0	4	1	1	2	1	2	1	1	1	1	1	1	2	1	1 MP	1	3	0	0
10007	6	0	3	2	1	4	1	1	1	2	1	1	1	1	1	1	1 MP	1	3	0	0
10008	8	1	3	1	1	3	0	1	1	1	1	1	1	1	1	1	1 MP	1	3	3	0
10009	22	1	1	3	1	3	0	1	1	1	1	1	1	1	1	1	1 MP	1	2	0	0
10010	12	1	2	3	1	4	0	1	1	1	1	2	2	1	1	1	1 MP	1	3	0	0
10011	6	1	4	2	0	3	0	1	1	1	1	1	1	1	2	1	1 MP	1	4	0	0
10012	6	0	3	1	1	4	0	1	1	1	1	1	1	2	1	1	1 MP	1	3	0	0
10013	6	0	3	2	1	3	1	1	1	1	1	1	1	1	1	1	1 MP	1	3	5	0
10014	5	0	4	2	0	4	0	1	1	1	1	1	2	1	1	1	1 MP	1	4	4	0
10015	8	1	3	1	1	3	0	1	1	1	1	2	2	2	1	1	1 MP	1	3	0	0
10017	5	0	4	1	0	4	1	1	1	1	1	1	2	2	2	1	1 MP	1	2	0	0
10018	8	1	3	1	1	3	0	1	1	1	1	1	1	1	2	1	1 MP	1	3	0	0
10019	5	0	4	1	1	4	1	1	1	1	1	1	1	1	2	1	1 MP	1	2	0	0
10020	6	0	3	3	1	4	1	2	2	1	1	2	2	1	2	1	1 MP	1	2	0	0
10021	6	1	4	2	0	3	1	1	1	1	1	1	1	2	1	1	1 MP	1	1	0	0
10022	5	0	4	2	0	3	1	1	1	1	1	1	1	2	1	1	1 MP	1	4	4	0
10023	12	1	2	1	1	3	1	1	1	1	1	1	2	1	2	1	1 MP	1	3	0	0
10024	22	1	1	1	1	4	1	1	1	1	1	2	1	2	2	1	1 MP	1	3	0	0
10025	8	1	3	1	1	3	0	1	2	1	1	1	1	2	1	1	1 MP	1	3	0	0
10026	22	1	1	1	1	4	0	1	1	1	1	1	1	1	1	1	1 MP	1	3	2	0
10027	8	1	3	1	1	3	1	1	1	1	1	1	1	1	1	1	1 MP	1	3	0	0
10028	6	0	3	2	1	4	1	1	1	1	1	1	1	1	1	1	1 MP	1	2	2	0
10029	6	0	3	2	1	3	1	1	1	1	1	1	2	1	1	1	1 MP	1	2	1	0
10030	6	0	3	3	0	3	1	1	1	2	1	1	1	2	2	2	1 MP	1	3	2	0
10031	6	1	4	1	0	3	1	1	1	2	1	1	1	1	1	1	1 MP	1	2	8	1
10032	5	0	4	1	1	3	0	1	1	1	1	1	1	1	2	1	1 MP	1	2	5	0
10033	6	1	4	3	0	3	1	1	1	1	1	1	2	1	1	1	1 MP	1	4	17	1
10034	6	1	4	1	1	3	1	1	1	1	1	1	1	2	1	1	1 MP	1	3	3	0
10036	12	1	2	1	1	3	1	1	1	1	1	1	1	1	1	1	1 MP	1	3	0	0
10037	6	0	3	1	0	4	1	2	1	1	1	2	2	1	1	1	1 MP	1	2	0	0
10038	6	0	3	1	0	3	1	1	1	1	1	1	1	1	1	1	1 MP	1	3	4	0
10039	5	0	4	3	0	3	1	1	2	1	1	1	1	1	1	1	1 MP	1	3	4	0
10040	8	1	3	1	1	3	1	1	1	1	1	1	2	1	1	1	1 MP	1	4	2	0
10041	6	1	4	2	1	3	1	2	2	1	1	1	1	1	2	1	1 MP	1	3	0	0
10042	8	0	2	1	1	3	1	1	2	1	1	1	1	1	1	1	1 MP	1	3	0	0
10043	8	1	3	1	1	2	1	1	1	1	1	1	1	1	2	1	1 MP	1	4	0	0
10044	6	0	3	2	1	4	1	1	1	1	1	1	1	1	1	1	1 MP	1	2	0	0
10045	5	0	4	1	1	4	1	1	1	1	1	1	1	1	1	1	1 MP	1	3	6	0
10046	5	0	4	1	0	4	0	1	1	1	1	2	1	1	1	1	1 MP	1	3	1	0
10047	6	1	4	1	1	3	1	1	1	1	1	1	2	2	2	1	1 MP	1	3	0	0
10048	8	1	3	1	1	4	1	1	2	1	1	1	1	2	2	1	1 MP	1	3	0	0
10049	8	0	2	1	1	1	0	1	1	1	1	1	2	1	2	1	1 MP	1	2	0	0
10050	12	1	2	2	1	3	1	1	1	1	1	1	1	1	2	1	1 MP	1	4	0	0
10051	6	0	3	1	0	4	0	1	1	1	1	1	2	1	1	1	1 MP	1	3	0	0
10052	8	1	3	1	1	3	1	1	1	1	1	1	1	1	1	1	1 MP	1	4	0	0
10053	6	0	3	2	1	4	1	1	1	1	1	1	1	2	2	1	1 MP	1	3	1	0
10054	5	0	4	1	0	3	0	1	1	1	1	1	1	1	2	1	1 MP	1	3	0	0
10055	6	1	4	1	1	1	0	1	1	1	1	1	1	1	2	1	1 MP	1	4	4	0
10056	11	0	1	1	1	4	1	1	1	1	1	1	1	1	1	1	1 MP	1	2	13	1
10057	8	1	3	2	1	4	1	1	1	1	1	1	1	1	1	1	1 MP	1	3	0	0
10058	6	0	3	1	0	3	0	1	1	1	1	1	1	1	2	1	1 MP	1	2	0	0
10059	11	0	1	2	0	3	0	1	1	1	1	1	1	1	2	1	1 MP	1	1	1	0
10060	12	1	2	1	1	3	1	1	1	1	1	1	1	1	1	1	1 MP	2		10	1
10061	6	0	3	1	1	5	0	1	1	2	1	1	1	1	1	1	1 MP	1	2	0	0
10063	6	0	3	1	0	4	0	1	1	1	1	1	1	1	2	1	1 MP	1	2	0	0
10064	6	1	4	1	0	3	0	1	1	1	1	1	1	1	1	1	1 MP	1	3	0	0
10065	8	0	2	1	1	4	1	1	1	1	1	1	1	1	2	1	1 MP	1	2	0	0
10066	8	0	2	1	1	3	1	1	1	1	1	1	1	1	1	1	1 MP	1	2	0	0
10067	8	1	3	1	1	3	0	1	2	1	1	2	1	2	1	1	1 MP	1	2	0	0
10068	8	1	3	1	1	3	0	1	1	1	1	1	2	1	1	1	1 MP	1	3	0	0
10069	5	0	4	1	1	2	1	1	1	1	1	1	1	1	1	1	1 MP	1	2	0	0
10070	8	1	3	1	1	3	1	1	2	1	1	1	1	1	2	1	1 MP	1	2	0	0
10071	6	0	3	1	0	4	0	2	1	1	1	1	2	2	1	1	1 MP	1	2	0	0
10072	6	0	3	2	1	4	1	1	1	1	1	2	1	2	1	1	1 MP	1	2	0	0
10073	8	1	3	1	1	4	1	1	1	1	1	1	1	1	1	1	1 MP	1	4	0	0
10074	6	1	4	1	1	1	0	1	1	1	1	1	1	2	1	1	1 MP	1	3	0	0
10075	11	0	1	2	0	5	1	1	1	1	1	1	2	1	1	1	1 MP	1	3	0	0
10076	12	1	2	2	1	4	0	1	1	1	1	2	2	2	1	1	1 MP	1	3	0	0
10077	8	1	3	1	1	3	1	1	1	1	1	1	1	2	1	1	1 MP	1	2	0	0
10081	8	1	3	3	1	4	1	1	2	1	1	1	1	2	2	1	1 MP	1	3	0	0
10082	6	0	3	1	1	4	1	1	2	1	1	1	1	2	1	1	1 MP	1	3	0	0
10083	6	0	3	3	0	3	1	1	1	1	1	1	1	1	1	1	1 MP	1	3	0	0
10084	8	1	3	1	1	3	0	1	1	1	1	2	1	1	2	1	1 MP	1	3	0	0
10085	8	1	3	1	1	4	1	1	1	1	2	2	2	1	1	1	1 MP	1	3	0	0
10086	22	1	1	3	1	3	0	1	1	1	1	1	1	1	1	1	1 MP	2		0	0
10088	11	0	1	1	1	4	1	1	1	1	1	1	1	1	1	1	1 MP	1	2	0	0
10089	6	0	3	2	1	2	0	1	1	1	1	1	1	1	1	1	1 MP	1	2	0	0
10090	6	0	3	2	1	3	0	1	1	1	1	1	1	1	1	1	1 MP	1	2	0	0
10091	8	0	2	1	1	4	0	1	1	1	1	1	1	1	1	1	1 MP	1	3	0	0
10092	8	0	2	1	1	4	0	1	1	1	1	1	1	1	1	1	1 MP	1	3	4	0
10093	8	1	3	1	1	4	1	1	2	1	1	2	1	2	1	1	1 MP	1	3	2	0
10094	8	1	3	2	1	4	0	2	1	1	1	2	2	1	1	1	1 MP	1	3	0	0
10095	8	0	2	2	1	4	0	1	2	1	1	1	1	1	1	1	1 MP	1	2	0	0
10096	12	1	2	2	1	4	0	2	2	1	1	1	2	2	1	1	1 MP	1	3	0	0
10097	12	1	2	1	1	3	1	1	1	1	1	1	1	2	1	1	1 MP	1	3	0	0
10099	8	0	2	2	1	1	1	2	1	1	2	1	2	1	1	1	1 MP	1	4	0	0
10100	6	0	3	2	1	4	0	1	2	1	1	1	1	2	1	1	1 MP	1	3	0	0
10101	8	1	3	1	1	4	0	1	2	1	1	1	1	1	1	1	1 MP	1	5	2	0
14900	21	1	3	1	1	3	1	1	1	1	2	1	1	1	2	1	2 BAR	1	4	5	0
14901	17	0	3	2	1	4		1	2	1	2	1	1	2	1	1	2 BAR	1	4	3	0
14902	21	0	2	1	1	4	0	1	1	1	1	1	2	2	1	1	2 BAR	1	2	4	0
14904	21	0	2	2	0	3	0	1	1	1	1	1	2	2	1	1	2 BAR	1	2	1	0
14905	21	0	2	1	0	3	0	1	2	1	1	1	1	1	1	1	2 BAR	1	2	4	0
14906	21	0	2	3	1	3	0	2	1	1	1	2	2	1	1	1	2 BAR	1	3	3	0
14908	19	1	4	1	1	4	0	1	1	1	1	1	1	1	2	1	2 BAR	1	3	0	0
14909	17	0	3	3	0	3	0	1	1	1	1	2	1	1	1	1	2 BAR	1	2	0	0
[truncated: 5,525 more rows]

## Sheet: codebook
variable	definition	categories
id	identifier
weight	weight by design
Male	gender	1 Male, 0 Female
AgeGroup	age in groups	1 35-44, 2 45-54, 3 55-64, 4 65-74
education	level education	1 Primary School, 2 Secondary School, 3 University
marital	marital status	1 married, 2 unmarried (single, divorced or widow)
cv1	health status	1 excellent, 2 very good, 3 good, 4 regular, f fair
alcohol	alcohol	1 Yes, 0 No
CurrentSmk	smoking	1 Yes, 0 No
Hypertension	Hypertension: systolic blood pressure ≥140 mm Hg and/or diastolic blood pressure ≥90 mm Hg and/or use of antihypertensive medication	1 Yes, 0 No
cv16a	divorce	1 No, 2 Yes
cv16b	dismissal from work	1 No, 2 Yes
cv16c	retirement	1 No, 2 Yes
cv16d	business failure	1 No, 2 Yes
cv16e	violence	1 No, 2 Yes
cv16f	Important family conflict	1 No, 2 Yes
cv16g	Personal injury or illness	1 No, 2 Yes
cv16h	Death of a close family member	1 No, 2 Yes
cv16i	Death of a spouse	1 No, 2 Yes
City	Location	"1 MP", "2 BAR", "3 TEM", "4 CAN"
SP1	Religion afiliation	1 Yes, 2 No
SP3	Frequency of attendance	1 Almost every day, 2 once a week, 3 few times a year, 4 less than once a year, 5 never
score_phq9	Score PHQ9	Continous. Range 0-27
mde	Major deppresive disorder	1 Yes, 2 No
